# Supplementary material for: Novel protective and risk loci in hip dysplasia in German Shepherds
Source: PLoS Genet. 2019 Jul 19;15(7):e1008197. doi: 10.1371/journal.pgen.1008197 (PMC6668854; doi:10.1371/journal.pgen.1008197)
Supplement: S2 Table — (XLSX) [file pgen.1008197.s014.xlsx]

## Sheet: S2_Table
POS	ALT	ens.GeneName	Func.ensGene	Gene.ensGeneID	ExonicFunc.ensGene	cases	controls	diff
30620530	A	TMEM100	intergenic	ENSCAFG00000017359.2,ENSCAFG00000017365.1	.	0	4	-4
30620531	A	TMEM100	intergenic	ENSCAFG00000017359.2,ENSCAFG00000017365.1	.	0	6	-6
30620532	A	TMEM100	intergenic	ENSCAFG00000017359.2,ENSCAFG00000017365.1	.	0	6	-6
30620641	CGG	TMEM100	intergenic	ENSCAFG00000017359.2,ENSCAFG00000017365.1	.	0	13	-13
30620647	C	TMEM100	intergenic	ENSCAFG00000017359.2,ENSCAFG00000017365.1	.	0	12	-12
30620686	C	TMEM100	intergenic	ENSCAFG00000017359.2,ENSCAFG00000017365.1	.	0	14	-14
30621000	A	TMEM100	intergenic	ENSCAFG00000017359.2,ENSCAFG00000017365.1	.	24	21	3
30621102	ACCT	TMEM100	intergenic	ENSCAFG00000017359.2,ENSCAFG00000017365.1	.	0	14	-14
30621180	G	TMEM100	intergenic	ENSCAFG00000017359.2,ENSCAFG00000017365.1	.	0	12	-12
30621205	G	TMEM100	intergenic	ENSCAFG00000017359.2,ENSCAFG00000017365.1	.	0	11	-11
30621323	AACACACACACACA	TMEM100	intergenic	ENSCAFG00000017359.2,ENSCAFG00000017365.1	.	1	2	-1
30621335	CA	TMEM100	intergenic	ENSCAFG00000017359.2,ENSCAFG00000017365.1	.	0	1	-1
30621337	CAGAGAGAGAGAG	TMEM100	intergenic	ENSCAFG00000017359.2,ENSCAFG00000017365.1	.	0	7	-7
30621337	G	TMEM100	intergenic	ENSCAFG00000017359.2,ENSCAFG00000017365.1	.	11	14	-3
30621567	A	TMEM100	intergenic	ENSCAFG00000017359.2,ENSCAFG00000017365.1	.	0	8	-8
30621728	C	TMEM100	intergenic	ENSCAFG00000017359.2,ENSCAFG00000017365.1	.	1	0	1
30621728	CAA	TMEM100	intergenic	ENSCAFG00000017359.2,ENSCAFG00000017365.1	.	0	1	-1
30621728	CAAAAAAAAAAAAAA,CAAAAAAAAAAAAAAAA,CAAAAAAAAAAAAAAA	TMEM100	intergenic	ENSCAFG00000017359.2,ENSCAFG00000017365.1	.	0	1	-1
30621745	T	TMEM100	intergenic	ENSCAFG00000017359.2,ENSCAFG00000017365.1	.	0	11	-11
30622060	TAA	TMEM100	intergenic	ENSCAFG00000017359.2,ENSCAFG00000017365.1	.	0	13	-13
30622208	T	TMEM100	intergenic	ENSCAFG00000017359.2,ENSCAFG00000017365.1	.	0	13	-13
30622422	A	TMEM100	intergenic	ENSCAFG00000017359.2,ENSCAFG00000017365.1	.	0	6	-6
30622542	T	TMEM100	intergenic	ENSCAFG00000017359.2,ENSCAFG00000017365.1	.	0	6	-6
30622543	T	TMEM100	intergenic	ENSCAFG00000017359.2,ENSCAFG00000017365.1	.	18	17	1
30623080	A	TMEM100	intergenic	ENSCAFG00000017359.2,ENSCAFG00000017365.1	.	0	13	-13
30623865	C	TMEM100	intergenic	ENSCAFG00000017359.2,ENSCAFG00000017365.1	.	2	0	2
30623866	AT	TMEM100	intergenic	ENSCAFG00000017359.2,ENSCAFG00000017365.1	.	6	1	5
30623866	ATT	TMEM100	intergenic	ENSCAFG00000017359.2,ENSCAFG00000017365.1	.	12	2	10
30623866	ATT,AT	TMEM100	intergenic	ENSCAFG00000017359.2,ENSCAFG00000017365.1	.	2	0	2
30623941	G	TMEM100	intergenic	ENSCAFG00000017359.2,ENSCAFG00000017365.1	.	22	3	19
30624180	T	TMEM100	intergenic	ENSCAFG00000017359.2,ENSCAFG00000017365.1	.	22	16	6
30624228	A	TMEM100	intergenic	ENSCAFG00000017359.2,ENSCAFG00000017365.1	.	22	16	6
30624248	TACAGA	TMEM100	intergenic	ENSCAFG00000017359.2,ENSCAFG00000017365.1	.	22	16	6
30624277	A	TMEM100	intergenic	ENSCAFG00000017359.2,ENSCAFG00000017365.1	.	22	3	19
30624298	C	TMEM100	intergenic	ENSCAFG00000017359.2,ENSCAFG00000017365.1	.	22	3	19
30624366	CTT	TMEM100	intergenic	ENSCAFG00000017359.2,ENSCAFG00000017365.1	.	22	16	6
30624445	G	TMEM100	intergenic	ENSCAFG00000017359.2,ENSCAFG00000017365.1	.	0	14	-14
30624480	C	TMEM100	intergenic	ENSCAFG00000017359.2,ENSCAFG00000017365.1	.	22	16	6
30624554	C	TMEM100	intergenic	ENSCAFG00000017359.2,ENSCAFG00000017365.1	.	22	16	6
30624604	T	TMEM100	intergenic	ENSCAFG00000017359.2,ENSCAFG00000017365.1	.	22	16	6
30624685	T	TMEM100	intergenic	ENSCAFG00000017359.2,ENSCAFG00000017365.1	.	22	3	19
30624697	T	TMEM100	intergenic	ENSCAFG00000017359.2,ENSCAFG00000017365.1	.	22	3	19
30624903	CT	TMEM100	intergenic	ENSCAFG00000017359.2,ENSCAFG00000017365.1	.	10	12	-2
30624903	CTTTTTTTTT	TMEM100	intergenic	ENSCAFG00000017359.2,ENSCAFG00000017365.1	.	3	2	1
30624903	CTTTTTTTTT,CCTTTTTTTTT		.	.	.	1	0	1
30624903	CTTTTTTTTT,CTTTTTTTTTT	TMEM100	intergenic	ENSCAFG00000017359.2,ENSCAFG00000017365.1	.	8	2	6
30625167	A	TMEM100	intergenic	ENSCAFG00000017359.2,ENSCAFG00000017365.1	.	22	16	6
30625233	A	TMEM100	intergenic	ENSCAFG00000017359.2,ENSCAFG00000017365.1	.	21	16	5
30625257	T	TMEM100	intergenic	ENSCAFG00000017359.2,ENSCAFG00000017365.1	.	21	16	5
30625293	T	TMEM100	intergenic	ENSCAFG00000017359.2,ENSCAFG00000017365.1	.	22	16	6
30625700	T	TMEM100	intergenic	ENSCAFG00000017359.2,ENSCAFG00000017365.1	.	22	3	19
30625768	TTG	TMEM100	intergenic	ENSCAFG00000017359.2,ENSCAFG00000017365.1	.	0	14	-14
30625860	C	TMEM100	intergenic	ENSCAFG00000017359.2,ENSCAFG00000017365.1	.	0	14	-14
30625971	A	TMEM100	intergenic	ENSCAFG00000017359.2,ENSCAFG00000017365.1	.	20	3	17
30626017	G	TMEM100	intergenic	ENSCAFG00000017359.2,ENSCAFG00000017365.1	.	18	3	15
30626250	G	TMEM100	intergenic	ENSCAFG00000017359.2,ENSCAFG00000017365.1	.	9	2	7
30626262	A	TMEM100	intergenic	ENSCAFG00000017359.2,ENSCAFG00000017365.1	.	8	2	6
30626458	G	TMEM100	intergenic	ENSCAFG00000017359.2,ENSCAFG00000017365.1	.	18	2	16
30626458	G,T	TMEM100	intergenic	ENSCAFG00000017359.2,ENSCAFG00000017365.1	.	1	0	1
30626491	A	TMEM100	intergenic	ENSCAFG00000017359.2,ENSCAFG00000017365.1	.	15	2	13
30626668	A,T	TMEM100	intergenic	ENSCAFG00000017359.2,ENSCAFG00000017365.1	.	1	0	1
30626716	T	TMEM100	intergenic	ENSCAFG00000017359.2,ENSCAFG00000017365.1	.	1	1	0
30626773	GAATA	TMEM100	intergenic	ENSCAFG00000017359.2,ENSCAFG00000017365.1	.	0	1	-1
30626773	GAATAAATAAATAAATAAATAAATAAATAAATAAATAAAT	TMEM100	intergenic	ENSCAFG00000017359.2,ENSCAFG00000017365.1	.	1	1	0
30626773	GAATAAATAAATAAATAAATAAATAAATAAATAAATAAAT,GAATAAATAAATAAATAAATAAATAAATAAATAAATAAATAAAT	TMEM100	intergenic	ENSCAFG00000017359.2,ENSCAFG00000017365.1	.	2	0	2
30626773	GAATAAATAAATAAATAAATAAATAAATAAATAAATAAATAAAT	TMEM100	intergenic	ENSCAFG00000017359.2,ENSCAFG00000017365.1	.	1	1	0
30626773	GAATAAATAAATAAATAAATAAATAAATAAATAAATAAATAAAT,GAATAAATAAATAAATAAATAAATAAATAAATAAATAAAT	TMEM100	intergenic	ENSCAFG00000017359.2,ENSCAFG00000017365.1	.	1	1	0
30626774	AATACATA	TMEM100	intergenic	ENSCAFG00000017359.2,ENSCAFG00000017365.1	.	0	1	-1
30626786	AATACATA	TMEM100	intergenic	ENSCAFG00000017359.2,ENSCAFG00000017365.1	.	0	1	-1
30626802	AATAAATACATAAAT	TMEM100	intergenic	ENSCAFG00000017359.2,ENSCAFG00000017365.1	.	1	0	1
30626802	AATAGATA	TMEM100	intergenic	ENSCAFG00000017359.2,ENSCAFG00000017365.1	.	1	0	1
30626805	AAATTAATT	TMEM100	intergenic	ENSCAFG00000017359.2,ENSCAFG00000017365.1	.	0	1	-1
30626816	C	TMEM100	intergenic	ENSCAFG00000017359.2,ENSCAFG00000017365.1	.	1	0	1
30627401	G	TMEM100	intergenic	ENSCAFG00000017359.2,ENSCAFG00000017365.1	.	22	16	6
30627403	T	TMEM100	intergenic	ENSCAFG00000017359.2,ENSCAFG00000017365.1	.	22	16	6
30627413	G	TMEM100	intergenic	ENSCAFG00000017359.2,ENSCAFG00000017365.1	.	22	16	6
30627993	T	TMEM100	intergenic	ENSCAFG00000017359.2,ENSCAFG00000017365.1	.	22	16	6
30628278	A	TMEM100	intergenic	ENSCAFG00000017359.2,ENSCAFG00000017365.1	.	22	16	6
30628628	C	TMEM100	intergenic	ENSCAFG00000017359.2,ENSCAFG00000017365.1	.	0	14	-14
30628629	T	TMEM100	intergenic	ENSCAFG00000017359.2,ENSCAFG00000017365.1	.	22	16	6
30628725	A	TMEM100	intergenic	ENSCAFG00000017359.2,ENSCAFG00000017365.1	.	22	15	7
30628880	G	TMEM100	intergenic	ENSCAFG00000017359.2,ENSCAFG00000017365.1	.	0	13	-13
30629093	G	TMEM100	intergenic	ENSCAFG00000017359.2,ENSCAFG00000017365.1	.	0	14	-14
30629594	A	TMEM100	intergenic	ENSCAFG00000017359.2,ENSCAFG00000017365.1	.	22	2	20
30629780	A	TMEM100	intergenic	ENSCAFG00000017359.2,ENSCAFG00000017365.1	.	0	14	-14
30629850	A	TMEM100	intergenic	ENSCAFG00000017359.2,ENSCAFG00000017365.1	.	22	16	6
30630077	T	TMEM100	intergenic	ENSCAFG00000017359.2,ENSCAFG00000017365.1	.	22	3	19
30631250	G	TMEM100	intergenic	ENSCAFG00000017359.2,ENSCAFG00000017365.1	.	21	16	5
30631268	G	TMEM100	intergenic	ENSCAFG00000017359.2,ENSCAFG00000017365.1	.	1	0	1
30631662	G	TMEM100	intergenic	ENSCAFG00000017359.2,ENSCAFG00000017365.1	.	0	13	-13
30631667	C	TMEM100	intergenic	ENSCAFG00000017359.2,ENSCAFG00000017365.1	.	22	3	19
30632467	C	TMEM100	intergenic	ENSCAFG00000017359.2,ENSCAFG00000017365.1	.	18	14	4
30632467	C,A	TMEM100	intergenic	ENSCAFG00000017359.2,ENSCAFG00000017365.1	.	0	1	-1
30632572	TTTTTGTTTTGTTTTGTTTTGTTTTGTTTTGTTTTGTTTTGTTTTGTTTT	TMEM100	intergenic	ENSCAFG00000017359.2,ENSCAFG00000017365.1	.	3	2	1
30632572	TTTTTGTTTTGTTTTGTTTTGTTTTGTTTTGTTTTGTTTTGTTTTGTTTT,TTTTGTTTTGTTTTGTTTTGTTTTGTTTTGTTTTGTTTTGTTTT		.	.	.	1	0	1
30632573	TTTT	TMEM100	intergenic	ENSCAFG00000017359.2,ENSCAFG00000017365.1	.	0	2	-2
30632626	TTTAGTT	TMEM100	intergenic	ENSCAFG00000017359.2,ENSCAFG00000017365.1	.	0	1	-1
30633616	C	TMEM100	intergenic	ENSCAFG00000017359.2,ENSCAFG00000017365.1	.	0	12	-12
30633616	C,A	TMEM100	intergenic	ENSCAFG00000017359.2,ENSCAFG00000017365.1	.	0	1	-1
30633695	A	TMEM100	intergenic	ENSCAFG00000017359.2,ENSCAFG00000017365.1	.	0	11	-11
30633698	A	TMEM100	intergenic	ENSCAFG00000017359.2,ENSCAFG00000017365.1	.	0	11	-11
30633801	G	TMEM100	intergenic	ENSCAFG00000017359.2,ENSCAFG00000017365.1	.	0	10	-10
30633922	G	TMEM100	intergenic	ENSCAFG00000017359.2,ENSCAFG00000017365.1	.	0	8	-8
30633934	G	TMEM100	intergenic	ENSCAFG00000017359.2,ENSCAFG00000017365.1	.	0	6	-6
30633942	A	TMEM100	intergenic	ENSCAFG00000017359.2,ENSCAFG00000017365.1	.	0	4	-4
30633943	A	TMEM100	intergenic	ENSCAFG00000017359.2,ENSCAFG00000017365.1	.	0	4	-4
30633944	A	TMEM100	intergenic	ENSCAFG00000017359.2,ENSCAFG00000017365.1	.	0	4	-4
30633959	A	TMEM100	intergenic	ENSCAFG00000017359.2,ENSCAFG00000017365.1	.	0	4	-4
30633964	G	TMEM100	intergenic	ENSCAFG00000017359.2,ENSCAFG00000017365.1	.	0	4	-4
30634012	C	TMEM100	intergenic	ENSCAFG00000017359.2,ENSCAFG00000017365.1	.	0	1	-1
30634068	G	TMEM100	intergenic	ENSCAFG00000017359.2,ENSCAFG00000017365.1	.	0	1	-1
30634176	G	TMEM100	intergenic	ENSCAFG00000017359.2,ENSCAFG00000017365.1	.	0	2	-2
30634178	GTGTGTGTGTGTGTGTTTGT	TMEM100	intergenic	ENSCAFG00000017359.2,ENSCAFG00000017365.1	.	0	1	-1
30634327	A	TMEM100	intergenic	ENSCAFG00000017359.2,ENSCAFG00000017365.1	.	0	5	-5
30634327	ATTTTTT	TMEM100	intergenic	ENSCAFG00000017359.2,ENSCAFG00000017365.1	.	0	2	-2
30634529	CTT	TMEM100	intergenic	ENSCAFG00000017359.2,ENSCAFG00000017365.1	.	0	13	-13
30634601	C	TMEM100	intergenic	ENSCAFG00000017359.2,ENSCAFG00000017365.1	.	0	13	-13
30634735	G	TMEM100	intergenic	ENSCAFG00000017359.2,ENSCAFG00000017365.1	.	21	15	6
30634735	G,T	TMEM100	intergenic	ENSCAFG00000017359.2,ENSCAFG00000017365.1	.	0	1	-1
30634825	A	TMEM100	intergenic	ENSCAFG00000017359.2,ENSCAFG00000017365.1	.	0	13	-13
30634948	CAA	TMEM100	intergenic	ENSCAFG00000017359.2,ENSCAFG00000017365.1	.	0	1	-1
30634948	CAAAAAAAAAA	TMEM100	intergenic	ENSCAFG00000017359.2,ENSCAFG00000017365.1	.	0	9	-9
30634948	CAAAAAAAAAA,CAAAAAAAAAAA	TMEM100	intergenic	ENSCAFG00000017359.2,ENSCAFG00000017365.1	.	0	1	-1
30634948	CAAAAAAAAAA,CAAAAAAAAAAA,CAAAAAAAAA	TMEM100	intergenic	ENSCAFG00000017359.2,ENSCAFG00000017365.1	.	0	1	-1
30634948	CAAAAAAAAAA,CAAAAAAAAAAAA,CAAAAAAAAA	TMEM100	intergenic	ENSCAFG00000017359.2,ENSCAFG00000017365.1	.	0	1	-1
30634948	CAAAAAAAAAA,CAAAAAAAAAAAA,CAAAAAAAAAAA	TMEM100	intergenic	ENSCAFG00000017359.2,ENSCAFG00000017365.1	.	0	1	-1
30634956	AAT	TMEM100	intergenic	ENSCAFG00000017359.2,ENSCAFG00000017365.1	.	0	1	-1
30635345	T	TMEM100	intergenic	ENSCAFG00000017359.2,ENSCAFG00000017365.1	.	0	14	-14
30635376	A	TMEM100	intergenic	ENSCAFG00000017359.2,ENSCAFG00000017365.1	.	0	14	-14
30635386	T	TMEM100	intergenic	ENSCAFG00000017359.2,ENSCAFG00000017365.1	.	22	16	6
30635441	A	TMEM100	intergenic	ENSCAFG00000017359.2,ENSCAFG00000017365.1	.	0	13	-13
30635472	C	TMEM100	intergenic	ENSCAFG00000017359.2,ENSCAFG00000017365.1	.	0	12	-12
30635509	TTTTCTTTC	TMEM100	intergenic	ENSCAFG00000017359.2,ENSCAFG00000017365.1	.	0	1	-1
30635510	TTTCC	TMEM100	intergenic	ENSCAFG00000017359.2,ENSCAFG00000017365.1	.	0	2	-2
30635510	TTTCCTTCCTTC	TMEM100	intergenic	ENSCAFG00000017359.2,ENSCAFG00000017365.1	.	0	10	-10
30635511	TTCCGTCC	TMEM100	intergenic	ENSCAFG00000017359.2,ENSCAFG00000017365.1	.	0	1	-1
30635550	C	TMEM100	intergenic	ENSCAFG00000017359.2,ENSCAFG00000017365.1	.	0	12	-12
30635718	C	TMEM100	intergenic	ENSCAFG00000017359.2,ENSCAFG00000017365.1	.	21	3	18
30636080	AAATAATAATAATAAT	TMEM100	intergenic	ENSCAFG00000017359.2,ENSCAFG00000017365.1	.	1	0	1
30636542	TAATAAA	TMEM100	intergenic	ENSCAFG00000017359.2,ENSCAFG00000017365.1	.	19	3	16
30638231	G	TMEM100	intergenic	ENSCAFG00000017359.2,ENSCAFG00000017365.1	.	0	1	-1
30638483	T	TMEM100	intergenic	ENSCAFG00000017359.2,ENSCAFG00000017365.1	.	0	1	-1
30638783	C	TMEM100	intergenic	ENSCAFG00000017359.2,ENSCAFG00000017365.1	.	0	1	-1
30639693	C	TMEM100	intergenic	ENSCAFG00000017359.2,ENSCAFG00000017365.1	.	0	1	-1
30640052	A	TMEM100	intergenic	ENSCAFG00000017359.2,ENSCAFG00000017365.1	.	4	3	1
30640052	ATTTTTTTTTTT	TMEM100	intergenic	ENSCAFG00000017359.2,ENSCAFG00000017365.1	.	0	1	-1
30640095	G	TMEM100	intergenic	ENSCAFG00000017359.2,ENSCAFG00000017365.1	.	0	1	-1
30640386	T	TMEM100	intergenic	ENSCAFG00000017359.2,ENSCAFG00000017365.1	.	0	1	-1
30640466	AACTCTG	TMEM100	intergenic	ENSCAFG00000017359.2,ENSCAFG00000017365.1	.	0	1	-1
30640542	C	TMEM100	intergenic	ENSCAFG00000017359.2,ENSCAFG00000017365.1	.	0	1	-1
30640559	A	TMEM100	intergenic	ENSCAFG00000017359.2,ENSCAFG00000017365.1	.	0	1	-1
30640573	A	TMEM100	intergenic	ENSCAFG00000017359.2,ENSCAFG00000017365.1	.	0	1	-1
30640675	A	TMEM100	intergenic	ENSCAFG00000017359.2,ENSCAFG00000017365.1	.	2	0	2
30640675	AACACACACACACACACACA	TMEM100	intergenic	ENSCAFG00000017359.2,ENSCAFG00000017365.1	.	0	1	-1
30640675	AACACACACACACACACACACA	TMEM100	intergenic	ENSCAFG00000017359.2,ENSCAFG00000017365.1	.	1	1	0
30640675	AACACACACACACACACACACACA	TMEM100	intergenic	ENSCAFG00000017359.2,ENSCAFG00000017365.1	.	6	5	1
30640715	C	TMEM100	intergenic	ENSCAFG00000017359.2,ENSCAFG00000017365.1	.	0	1	-1
30640719	A	TMEM100	intergenic	ENSCAFG00000017359.2,ENSCAFG00000017365.1	.	0	1	-1
30640763	T	TMEM100	intergenic	ENSCAFG00000017359.2,ENSCAFG00000017365.1	.	22	2	20
30641217	C	TMEM100	intergenic	ENSCAFG00000017359.2,ENSCAFG00000017365.1	.	0	1	-1
30641299	A	TMEM100	intergenic	ENSCAFG00000017359.2,ENSCAFG00000017365.1	.	0	1	-1
30641418	C	TMEM100	intergenic	ENSCAFG00000017359.2,ENSCAFG00000017365.1	.	0	1	-1
30641476	G	TMEM100	intergenic	ENSCAFG00000017359.2,ENSCAFG00000017365.1	.	0	1	-1
30641488	A	TMEM100	intergenic	ENSCAFG00000017359.2,ENSCAFG00000017365.1	.	0	1	-1
30641581	C	TMEM100	intergenic	ENSCAFG00000017359.2,ENSCAFG00000017365.1	.	0	1	-1
30641989	C	TMEM100	intergenic	ENSCAFG00000017359.2,ENSCAFG00000017365.1	.	0	1	-1
30642486	T	TMEM100	intergenic	ENSCAFG00000017359.2,ENSCAFG00000017365.1	.	0	1	-1
30642486	TTCTCTCTCTCTC	TMEM100	intergenic	ENSCAFG00000017359.2,ENSCAFG00000017365.1	.	1	0	1
30642515	T	TMEM100	intergenic	ENSCAFG00000017359.2,ENSCAFG00000017365.1	.	2	2	0
30642515	TAA	TMEM100	intergenic	ENSCAFG00000017359.2,ENSCAFG00000017365.1	.	0	1	-1
30642559	G	TMEM100	intergenic	ENSCAFG00000017359.2,ENSCAFG00000017365.1	.	0	1	-1
30642725	GTGTTCT	TMEM100	intergenic	ENSCAFG00000017359.2,ENSCAFG00000017365.1	.	0	1	-1
30642926	A	TMEM100	intergenic	ENSCAFG00000017359.2,ENSCAFG00000017365.1	.	0	1	-1
30643561	T	TMEM100	intergenic	ENSCAFG00000017359.2,ENSCAFG00000017365.1	.	0	1	-1
30644446	G	TMEM100	intergenic	ENSCAFG00000017359.2,ENSCAFG00000017365.1	.	1	0	1
30644448	G	TMEM100	intergenic	ENSCAFG00000017359.2,ENSCAFG00000017365.1	.	1	0	1
30644458	G	TMEM100	intergenic	ENSCAFG00000017359.2,ENSCAFG00000017365.1	.	1	0	1
30644686	C	TMEM100	intergenic	ENSCAFG00000017359.2,ENSCAFG00000017365.1	.	0	1	-1
30644857	G	TMEM100	intergenic	ENSCAFG00000017359.2,ENSCAFG00000017365.1	.	0	1	-1
30644876	T	TMEM100	intergenic	ENSCAFG00000017359.2,ENSCAFG00000017365.1	.	0	1	-1
30645130	T	TMEM100	intergenic	ENSCAFG00000017359.2,ENSCAFG00000017365.1	.	1	0	1
30645130	T,TTATATCTATATC	TMEM100	intergenic	ENSCAFG00000017359.2,ENSCAFG00000017365.1	.	0	2	-2
30645130	TTATATC	TMEM100	intergenic	ENSCAFG00000017359.2,ENSCAFG00000017365.1	.	0	1	-1
30645130	TTATATCTATATCTATATCTATATCTATATCTATATCTATATCTATA	TMEM100	intergenic	ENSCAFG00000017359.2,ENSCAFG00000017365.1	.	17	6	11
30645130	TTATATCTATATCTATATCTATATCTATATCTATATCTATATCTATA,TTATATCTATATCTATATCTATATCTATATCTATATCTATATCTATATCTATATCTATA	TMEM100	intergenic	ENSCAFG00000017359.2,ENSCAFG00000017365.1	.	0	3	-3
30645130	TTATATCTATATCTATATCTATATCTATATCTATATCTATATCTATA,TTATATCTATATCTATATCTATATCTATATCTATATCTATATCTATATCTATATCTATA,TTATATCTATATCTATATCTATATCTATATCTATATCTATA	TMEM100	intergenic	ENSCAFG00000017359.2,ENSCAFG00000017365.1	.	0	1	-1
30645130	TTATATCTATATCTATATCTATATCTATATCTATATCTATATCTATATCTATATCTATA	TMEM100	intergenic	ENSCAFG00000017359.2,ENSCAFG00000017365.1	.	0	1	-1
30645130	TTATATCTATATCTATATCTATATCTATATCTATATCTATATCTATATCTATATCTATA,TTATATCTATATCTATATCTATATCTATATCTATATCTATATCTATA	TMEM100	intergenic	ENSCAFG00000017359.2,ENSCAFG00000017365.1	.	0	1	-1
30645137	TATATCAATATC	TMEM100	intergenic	ENSCAFG00000017359.2,ENSCAFG00000017365.1	.	0	1	-1
30645151	TATCTAGATCTA	TMEM100	intergenic	ENSCAFG00000017359.2,ENSCAFG00000017365.1	.	0	1	-1
30645155	TTTATCG	TMEM100	intergenic	ENSCAFG00000017359.2,ENSCAFG00000017365.1	.	0	1	-1
30645169	T	TMEM100	intergenic	ENSCAFG00000017359.2,ENSCAFG00000017365.1	.	1	0	1
30645305	A	TMEM100	intergenic	ENSCAFG00000017359.2,ENSCAFG00000017365.1	.	0	1	-1
30648291	A	TMEM100	intergenic	ENSCAFG00000017359.2,ENSCAFG00000017365.1	.	24	24	0
30648936	C	TMEM100	intergenic	ENSCAFG00000017359.2,ENSCAFG00000017365.1	.	0	1	-1
30649213	C	TMEM100	intergenic	ENSCAFG00000017359.2,ENSCAFG00000017365.1	.	0	1	-1
30649449	G	TMEM100	intergenic	ENSCAFG00000017359.2,ENSCAFG00000017365.1	.	17	13	4
30649622	C	TMEM100	intergenic	ENSCAFG00000017359.2,ENSCAFG00000017365.1	.	1	2	-1
30649699	G	TMEM100	intergenic	ENSCAFG00000017359.2,ENSCAFG00000017365.1	.	2	2	0
30649729	A	TMEM100	intergenic	ENSCAFG00000017359.2,ENSCAFG00000017365.1	.	2	3	-1
30649730	A	TMEM100	intergenic	ENSCAFG00000017359.2,ENSCAFG00000017365.1	.	2	3	-1
30649860	C	TMEM100	intergenic	ENSCAFG00000017359.2,ENSCAFG00000017365.1	.	13	8	5
30650217	A	TMEM100	intergenic	ENSCAFG00000017359.2,ENSCAFG00000017365.1	.	0	1	-1
30650504	C	TMEM100	intergenic	ENSCAFG00000017359.2,ENSCAFG00000017365.1	.	24	24	0
30650790	A	TMEM100	intergenic	ENSCAFG00000017359.2,ENSCAFG00000017365.1	.	22	15	7
30650822	G	TMEM100	intergenic	ENSCAFG00000017359.2,ENSCAFG00000017365.1	.	22	15	7
30650960	C	TMEM100	intergenic	ENSCAFG00000017359.2,ENSCAFG00000017365.1	.	0	1	-1
30650979	C	TMEM100	intergenic	ENSCAFG00000017359.2,ENSCAFG00000017365.1	.	19	13	6
30651077	G	TMEM100	intergenic	ENSCAFG00000017359.2,ENSCAFG00000017365.1	.	12	10	2
30651106	T	TMEM100	intergenic	ENSCAFG00000017359.2,ENSCAFG00000017365.1	.	12	9	3
30651141	GGTGTGTGTGTGTGTGTGTGTGTGT	TMEM100	intergenic	ENSCAFG00000017359.2,ENSCAFG00000017365.1	.	2	0	2
30651141	GGTGTGTGTGTGTGTGTGTGTGTGTGTGTGT,GGTGTGTGTGTGTGTGTGTGTGTGT	TMEM100	intergenic	ENSCAFG00000017359.2,ENSCAFG00000017365.1	.	0	1	-1
30651143	G	TMEM100	intergenic	ENSCAFG00000017359.2,ENSCAFG00000017365.1	.	5	6	-1
30651164	GTTT	TMEM100	intergenic	ENSCAFG00000017359.2,ENSCAFG00000017365.1	.	0	1	-1
30651164	T	TMEM100	intergenic	ENSCAFG00000017359.2,ENSCAFG00000017365.1	.	6	7	-1
30651178	A	TMEM100	intergenic	ENSCAFG00000017359.2,ENSCAFG00000017365.1	.	0	1	-1
30651178	GTTTATTTATTTATTTATTTATTTATTTATTTATTTATTTATTT	TMEM100	intergenic	ENSCAFG00000017359.2,ENSCAFG00000017365.1	.	1	3	-2
30651202	ATTTGTTT	TMEM100	intergenic	ENSCAFG00000017359.2,ENSCAFG00000017365.1	.	0	1	-1
30651264	A	TMEM100	intergenic	ENSCAFG00000017359.2,ENSCAFG00000017365.1	.	1	3	-2
30651296	A	TMEM100	intergenic	ENSCAFG00000017359.2,ENSCAFG00000017365.1	.	2	2	0
30651527	C	TMEM100	intergenic	ENSCAFG00000017359.2,ENSCAFG00000017365.1	.	5	6	-1
30651570	G	TMEM100	intergenic	ENSCAFG00000017359.2,ENSCAFG00000017365.1	.	8	6	2
30651577	T	TMEM100	intergenic	ENSCAFG00000017359.2,ENSCAFG00000017365.1	.	8	7	1
30651616	C	TMEM100	intergenic	ENSCAFG00000017359.2,ENSCAFG00000017365.1	.	12	9	3
30652547	T	TMEM100	intergenic	ENSCAFG00000017359.2,ENSCAFG00000017365.1	.	22	16	6
30652604	T	TMEM100	intergenic	ENSCAFG00000017359.2,ENSCAFG00000017365.1	.	22	16	6
30652625	C	TMEM100	intergenic	ENSCAFG00000017359.2,ENSCAFG00000017365.1	.	22	16	6
30652754	AGGG	TMEM100	intergenic	ENSCAFG00000017359.2,ENSCAFG00000017365.1	.	11	20	-9
30653156	A	TMEM100	intergenic	ENSCAFG00000017359.2,ENSCAFG00000017365.1	.	11	20	-9
30653440	A	TMEM100	intergenic	ENSCAFG00000017359.2,ENSCAFG00000017365.1	.	22	15	7
30653464	G	TMEM100	intergenic	ENSCAFG00000017359.2,ENSCAFG00000017365.1	.	22	16	6
30653575	C	TMEM100	intergenic	ENSCAFG00000017359.2,ENSCAFG00000017365.1	.	24	24	0
30653612	T	TMEM100	intergenic	ENSCAFG00000017359.2,ENSCAFG00000017365.1	.	24	24	0
30654386	C	TMEM100	intergenic	ENSCAFG00000017359.2,ENSCAFG00000017365.1	.	22	15	7
30654987	T	TMEM100	intergenic	ENSCAFG00000017359.2,ENSCAFG00000017365.1	.	22	15	7
30655314	C	TMEM100	intergenic	ENSCAFG00000017359.2,ENSCAFG00000017365.1	.	22	15	7
30655329	G	TMEM100	intergenic	ENSCAFG00000017359.2,ENSCAFG00000017365.1	.	22	15	7
30655483	CAAA	TMEM100	intergenic	ENSCAFG00000017359.2,ENSCAFG00000017365.1	.	13	12	1
30655483	CAAA,CAAAA	TMEM100	intergenic	ENSCAFG00000017359.2,ENSCAFG00000017365.1	.	2	1	1
30655483	CAAA,CAAAA,CAA	TMEM100	intergenic	ENSCAFG00000017359.2,ENSCAFG00000017365.1	.	1	0	1
30655483	CAAA,CAAAA,CAAAAAA	TMEM100	intergenic	ENSCAFG00000017359.2,ENSCAFG00000017365.1	.	1	0	1
30655483	CAAAA,CAAA	TMEM100	intergenic	ENSCAFG00000017359.2,ENSCAFG00000017365.1	.	1	0	1
30655485	A	TMEM100	intergenic	ENSCAFG00000017359.2,ENSCAFG00000017365.1	.	20	14	6
30655516	A	TMEM100	intergenic	ENSCAFG00000017359.2,ENSCAFG00000017365.1	.	17	12	5
30656006	C	TMEM100	intergenic	ENSCAFG00000017359.2,ENSCAFG00000017365.1	.	15	10	5
30656006	C,A	TMEM100	intergenic	ENSCAFG00000017359.2,ENSCAFG00000017365.1	.	0	1	-1
30656035	G	TMEM100	intergenic	ENSCAFG00000017359.2,ENSCAFG00000017365.1	.	16	10	6
30656059	C	TMEM100	intergenic	ENSCAFG00000017359.2,ENSCAFG00000017365.1	.	17	12	5
30656557	G	TMEM100	intergenic	ENSCAFG00000017359.2,ENSCAFG00000017365.1	.	21	14	7
30657050	A	TMEM100	intergenic	ENSCAFG00000017359.2,ENSCAFG00000017365.1	.	0	1	-1
30657086	G	TMEM100	intergenic	ENSCAFG00000017359.2,ENSCAFG00000017365.1	.	16	12	4
30657196	G	TMEM100	intergenic	ENSCAFG00000017359.2,ENSCAFG00000017365.1	.	19	13	6
30658275	TTCTCTCTCTCTCT	TMEM100	intergenic	ENSCAFG00000017359.2,ENSCAFG00000017365.1	.	4	0	4
30658319	C	TMEM100	intergenic	ENSCAFG00000017359.2,ENSCAFG00000017365.1	.	1	1	0
30659668	G	TMEM100	intergenic	ENSCAFG00000017359.2,ENSCAFG00000017365.1	.	22	15	7
30659712	A	TMEM100	intergenic	ENSCAFG00000017359.2,ENSCAFG00000017365.1	.	22	15	7
30659847	TCC	TMEM100	intergenic	ENSCAFG00000017359.2,ENSCAFG00000017365.1	.	0	1	-1
30659847	TCC,TCCC	TMEM100	intergenic	ENSCAFG00000017359.2,ENSCAFG00000017365.1	.	0	1	-1
30659847	TCCC	TMEM100	intergenic	ENSCAFG00000017359.2,ENSCAFG00000017365.1	.	0	2	-2
30659847	TCCCCCCCCCC	TMEM100	intergenic	ENSCAFG00000017359.2,ENSCAFG00000017365.1	.	8	1	7
30659847	TCCCCCCCCCC,TCCCCCCCCC	TMEM100	intergenic	ENSCAFG00000017359.2,ENSCAFG00000017365.1	.	7	0	7
30659847	TCCCCCCCCCC,TCCCCCCCCC,TCCCCCCCCCCC	TMEM100	intergenic	ENSCAFG00000017359.2,ENSCAFG00000017365.1	.	2	0	2
30659847	TCCCCCCCCCC,TCCCCCCCCCCC	TMEM100	intergenic	ENSCAFG00000017359.2,ENSCAFG00000017365.1	.	2	1	1
30659847	TCCCCCCCCCC,TCCCCCCCCCCC,TCCCCCCCCC	TMEM100	intergenic	ENSCAFG00000017359.2,ENSCAFG00000017365.1	.	1	0	1
30659847	TCCCCCCCCCC,TCCCCCCCCCCC,TCCCCCCCCCCCC	TMEM100	intergenic	ENSCAFG00000017359.2,ENSCAFG00000017365.1	.	0	1	-1
30659847	TCCCCCCCCCCC	TMEM100	intergenic	ENSCAFG00000017359.2,ENSCAFG00000017365.1	.	0	5	-5
30659847	TCCCCCCCCCCC,TCCCCCCCCCC	TMEM100	intergenic	ENSCAFG00000017359.2,ENSCAFG00000017365.1	.	0	1	-1
30659847	TCCCCCCCCCCC,TCCCCCCCCCCCC	TMEM100	intergenic	ENSCAFG00000017359.2,ENSCAFG00000017365.1	.	0	1	-1
30659849	CCCACC	TMEM100	intergenic	ENSCAFG00000017359.2,ENSCAFG00000017365.1	.	0	1	-1
30659850	CCCGCC	TMEM100	intergenic	ENSCAFG00000017359.2,ENSCAFG00000017365.1	.	0	1	-1
30661783	G	TMEM100	intergenic	ENSCAFG00000017359.2,ENSCAFG00000017365.1	.	22	15	7
30662309	CCTT	TMEM100	intergenic	ENSCAFG00000017359.2,ENSCAFG00000017365.1	.	1	0	1
30662309	CCTTCTT	TMEM100	intergenic	ENSCAFG00000017359.2,ENSCAFG00000017365.1	.	21	2	19
30662312	TCTC	TMEM100	intergenic	ENSCAFG00000017359.2,ENSCAFG00000017365.1	.	1	0	1
30662638	A	TMEM100	intergenic	ENSCAFG00000017359.2,ENSCAFG00000017365.1	.	22	2	20
30663364	T	TMEM100	intergenic	ENSCAFG00000017359.2,ENSCAFG00000017365.1	.	2	0	2
30664581	A	TMEM100	intergenic	ENSCAFG00000017359.2,ENSCAFG00000017365.1	.	22	2	20
30665324	G	TMEM100	intergenic	ENSCAFG00000017359.2,ENSCAFG00000017365.1	.	22	2	20
30665878	C	TMEM100	intergenic	ENSCAFG00000017359.2,ENSCAFG00000017365.1	.	22	2	20
30666187	C	TMEM100	intergenic	ENSCAFG00000017359.2,ENSCAFG00000017365.1	.	22	2	20
30666361	G	TMEM100	intergenic	ENSCAFG00000017359.2,ENSCAFG00000017365.1	.	22	2	20
30667044	AAAGAAGAAGAAGAAGAAGAAGAAGAAGAAGAAGAAGAAGAAGAAGAAGAAGAA	TMEM100	intergenic	ENSCAFG00000017359.2,ENSCAFG00000017365.1	.	1	1	0
30667044	AAAGAAGAAGAAGAAGAAGAAGAAGAAGAAGAAGAAGAAGAAGAAGAAGAAGAA,AAAGAAGAAGAAGAAGAAGAAGAAGAAGAAGAAGAAGAAGAAGAAGAA	TMEM100	intergenic	ENSCAFG00000017359.2,ENSCAFG00000017365.1	.	0	1	-1
30667044	AAAGAAGAAGAAGAAGAAGAAGAAGAAGAAGAAGAAGAAGAAGAAGAAGAAGAA,AAAGAAGAAGAAGAAGAAGAAGAAGAAGAAGAAGAAGAAGAAGAAGAAGAAGAAGAA	TMEM100	intergenic	ENSCAFG00000017359.2,ENSCAFG00000017365.1	.	0	1	-1
30667044	AAAGAAGAAGAAGAAGAAGAAGAAGAAGAAGAAGAAGAAGAAGAAGAAGAAGAAGAA,AAAGAAGAAGAAGAAGAAGAAGAAGAAGAAGAAGAAGAAGAAGAAGAAGAAGAA,AAAGAAGAAGAAGAAGAAGAAGAAGAAGAAGAAGAAGAAGAAGAAGAA	TMEM100	intergenic	ENSCAFG00000017359.2,ENSCAFG00000017365.1	.	0	1	-1
30667075	AAGAAGCAGAAG	TMEM100	intergenic	ENSCAFG00000017359.2,ENSCAFG00000017365.1	.	1	0	1
30667075	AAGCAG	TMEM100	intergenic	ENSCAFG00000017359.2,ENSCAFG00000017365.1	.	0	1	-1
30667086	GAAGAAGAAAAAGAAGAA	TMEM100	intergenic	ENSCAFG00000017359.2,ENSCAFG00000017365.1	.	1	0	1
30667103	G	TMEM100	intergenic	ENSCAFG00000017359.2,ENSCAFG00000017365.1	.	1	0	1
30667132	GAA	TMEM100	intergenic	ENSCAFG00000017359.2,ENSCAFG00000017365.1	.	1	0	1
30667135	GAA	TMEM100	intergenic	ENSCAFG00000017359.2,ENSCAFG00000017365.1	.	9	0	9
30667135	GAA,GAACAA	TMEM100	intergenic	ENSCAFG00000017359.2,ENSCAFG00000017365.1	.	1	0	1
30667135	GAACAA	TMEM100	intergenic	ENSCAFG00000017359.2,ENSCAFG00000017365.1	.	2	0	2
30667135	GAACAA,GAA	TMEM100	intergenic	ENSCAFG00000017359.2,ENSCAFG00000017365.1	.	2	0	2
30667138	GAA	TMEM100	intergenic	ENSCAFG00000017359.2,ENSCAFG00000017365.1	.	1	0	1
30667141	C	TMEM100	intergenic	ENSCAFG00000017359.2,ENSCAFG00000017365.1	.	0	1	-1
30667141	GAACAACAACAACAACAACAACAACAACAACAACAACAACAACAAC	TMEM100	intergenic	ENSCAFG00000017359.2,ENSCAFG00000017365.1	.	0	2	-2
30667141	GAACAACAACAACAACAACAACAACAACAACAACAACAACAACAAC,GAACAACAACAACAACAACAACAACAACAACAACAACAAC	TMEM100	intergenic	ENSCAFG00000017359.2,ENSCAFG00000017365.1	.	0	1	-1
30667144	G	TMEM100	intergenic	ENSCAFG00000017359.2,ENSCAFG00000017365.1	.	1	0	1
30667738	G	TMEM100	intergenic	ENSCAFG00000017359.2,ENSCAFG00000017365.1	.	22	2	20
30667833	A	TMEM100	intergenic	ENSCAFG00000017359.2,ENSCAFG00000017365.1	.	22	2	20
30667887	G	TMEM100	intergenic	ENSCAFG00000017359.2,ENSCAFG00000017365.1	.	21	2	19
30668027	GGA	TMEM100	intergenic	ENSCAFG00000017359.2,ENSCAFG00000017365.1	.	22	2	20
30668428	A	TMEM100	intergenic	ENSCAFG00000017359.2,ENSCAFG00000017365.1	.	1	0	1
30668428	CAAA	TMEM100	intergenic	ENSCAFG00000017359.2,ENSCAFG00000017365.1	.	1	1	0
30668428	CAAAAAAAAAAAA	TMEM100	intergenic	ENSCAFG00000017359.2,ENSCAFG00000017365.1	.	5	0	5
30668428	CAAAAAAAAAAAA,CAAAAAAAAAA,CAAAAAAAAAAA	TMEM100	intergenic	ENSCAFG00000017359.2,ENSCAFG00000017365.1	.	1	0	1
30668428	CAAAAAAAAAAAA,CAAAAAAAAAAA,CAAAAAAAAAA	TMEM100	intergenic	ENSCAFG00000017359.2,ENSCAFG00000017365.1	.	1	0	1
30668428	CAAAAAAAAAAAA,CAAAAAAAAAAA,CAAAAAAAAAAAAA	TMEM100	intergenic	ENSCAFG00000017359.2,ENSCAFG00000017365.1	.	1	0	1
30668428	CAAAAAAAAAAAA,CAAAAAAAAAAAAA	TMEM100	intergenic	ENSCAFG00000017359.2,ENSCAFG00000017365.1	.	4	0	4
30668428	CAAAAAAAAAAAA,CAAAAAAAAAAAAA,CAAAAAAAAAAA	TMEM100	intergenic	ENSCAFG00000017359.2,ENSCAFG00000017365.1	.	1	0	1
30668428	CAAAAAAAAAAAA,CAAAAAAAAAAAAAA,CAAAAAAAAAAAAA	TMEM100	intergenic	ENSCAFG00000017359.2,ENSCAFG00000017365.1	.	1	0	1
30668428	CAAAAAAAAAAAA,CAAAAAAAAAAAAAA,CAAAAAAAAAAAAAAA	TMEM100	intergenic	ENSCAFG00000017359.2,ENSCAFG00000017365.1	.	1	0	1
30668429	AAAGAA	TMEM100	intergenic	ENSCAFG00000017359.2,ENSCAFG00000017365.1	.	1	0	1
30668430	AAACAA	TMEM100	intergenic	ENSCAFG00000017359.2,ENSCAFG00000017365.1	.	1	0	1
30668514	AGT	TMEM100	intergenic	ENSCAFG00000017359.2,ENSCAFG00000017365.1	.	18	1	17
30668554	T	TMEM100	intergenic	ENSCAFG00000017359.2,ENSCAFG00000017365.1	.	16	2	14
30668833	T	TMEM100	intergenic	ENSCAFG00000017359.2,ENSCAFG00000017365.1	.	16	1	15
30668935	T	TMEM100	intergenic	ENSCAFG00000017359.2,ENSCAFG00000017365.1	.	21	2	19
30669132	G	TMEM100	intergenic	ENSCAFG00000017359.2,ENSCAFG00000017365.1	.	22	2	20
30669354	G	TMEM100	intergenic	ENSCAFG00000017359.2,ENSCAFG00000017365.1	.	2	0	2
30669357	G	TMEM100	intergenic	ENSCAFG00000017359.2,ENSCAFG00000017365.1	.	12	1	11
30669425	C	TMEM100	intergenic	ENSCAFG00000017359.2,ENSCAFG00000017365.1	.	10	1	9
30669478	C	TMEM100	intergenic	ENSCAFG00000017359.2,ENSCAFG00000017365.1	.	11	1	10
30670142	G	TMEM100	intergenic	ENSCAFG00000017359.2,ENSCAFG00000017365.1	.	4	1	3
30670335	C	TMEM100	intergenic	ENSCAFG00000017359.2,ENSCAFG00000017365.1	.	22	2	20
30670505	A	TMEM100	intergenic	ENSCAFG00000017359.2,ENSCAFG00000017365.1	.	22	2	20
30670598	G	TMEM100	intergenic	ENSCAFG00000017359.2,ENSCAFG00000017365.1	.	22	2	20
30670605	G	TMEM100	intergenic	ENSCAFG00000017359.2,ENSCAFG00000017365.1	.	22	2	20
30673024	T	TMEM100	intergenic	ENSCAFG00000017359.2,ENSCAFG00000017365.1	.	1	0	1
30673024	TTGTGTGTGTGTGTGTGT	TMEM100	intergenic	ENSCAFG00000017359.2,ENSCAFG00000017365.1	.	0	4	-4
30673807	G	TMEM100	intergenic	ENSCAFG00000017359.2,ENSCAFG00000017365.1	.	6	2	4
30673841	A	TMEM100	intergenic	ENSCAFG00000017359.2,ENSCAFG00000017365.1	.	6	1	5
30674271	C	TMEM100	intergenic	ENSCAFG00000017359.2,ENSCAFG00000017365.1	.	1	0	1
30674296	A	TMEM100	intergenic	ENSCAFG00000017359.2,ENSCAFG00000017365.1	.	2	2	0
30674338	A	TMEM100	intergenic	ENSCAFG00000017359.2,ENSCAFG00000017365.1	.	5	1	4
30674730	G	TMEM100	intergenic	ENSCAFG00000017359.2,ENSCAFG00000017365.1	.	21	2	19
30675372	T	TMEM100	intergenic	ENSCAFG00000017359.2,ENSCAFG00000017365.1	.	22	2	20
30675490	A	TMEM100	intergenic	ENSCAFG00000017359.2,ENSCAFG00000017365.1	.	22	2	20
30675730	T	TMEM100	intergenic	ENSCAFG00000017359.2,ENSCAFG00000017365.1	.	14	2	12
30675843	A	TMEM100	intergenic	ENSCAFG00000017359.2,ENSCAFG00000017365.1	.	8	1	7
30675873	C	TMEM100	intergenic	ENSCAFG00000017359.2,ENSCAFG00000017365.1	.	10	1	9
30675902	TC	TMEM100	intergenic	ENSCAFG00000017359.2,ENSCAFG00000017365.1	.	1	0	1
30675902	TCTCC,T	TMEM100	intergenic	ENSCAFG00000017359.2,ENSCAFG00000017365.1	.	1	0	1
30675907	T	TMEM100	intergenic	ENSCAFG00000017359.2,ENSCAFG00000017365.1	.	2	0	2
30675907	TC	TMEM100	intergenic	ENSCAFG00000017359.2,ENSCAFG00000017365.1	.	2	0	2
30675909	C	TMEM100	intergenic	ENSCAFG00000017359.2,ENSCAFG00000017365.1	.	1	0	1
30675909	GCTCTCTCTCTCTCTCT	TMEM100	intergenic	ENSCAFG00000017359.2,ENSCAFG00000017365.1	.	0	3	-3
30675928	C	TMEM100	intergenic	ENSCAFG00000017359.2,ENSCAFG00000017365.1	.	8	1	7
30675958	TAAAAAAAA	TMEM100	intergenic	ENSCAFG00000017359.2,ENSCAFG00000017365.1	.	11	0	11
30675958	TAAAAAAAA,TAAAAAAA	TMEM100	intergenic	ENSCAFG00000017359.2,ENSCAFG00000017365.1	.	1	0	1
30675972	G	TMEM100	intergenic	ENSCAFG00000017359.2,ENSCAFG00000017365.1	.	14	2	12
30676081	C	TMEM100	intergenic	ENSCAFG00000017359.2,ENSCAFG00000017365.1	.	19	2	17
30676118	C	TMEM100	intergenic	ENSCAFG00000017359.2,ENSCAFG00000017365.1	.	20	2	18
30676118	C,A	TMEM100	intergenic	ENSCAFG00000017359.2,ENSCAFG00000017365.1	.	1	0	1
30676165	T	TMEM100	intergenic	ENSCAFG00000017359.2,ENSCAFG00000017365.1	.	22	2	20
30676252	T	TMEM100	intergenic	ENSCAFG00000017359.2,ENSCAFG00000017365.1	.	22	2	20
30676261	C	TMEM100	intergenic	ENSCAFG00000017359.2,ENSCAFG00000017365.1	.	22	2	20
30676333	ATTTT	TMEM100	intergenic	ENSCAFG00000017359.2,ENSCAFG00000017365.1	.	22	2	20
30676355	T	TMEM100	intergenic	ENSCAFG00000017359.2,ENSCAFG00000017365.1	.	22	2	20
30676413	TTCCCCCC	TMEM100	intergenic	ENSCAFG00000017359.2,ENSCAFG00000017365.1	.	1	0	1
30676413	TTCCCCCCC	TMEM100	intergenic	ENSCAFG00000017359.2,ENSCAFG00000017365.1	.	5	1	4
30676416	C	TMEM100	intergenic	ENSCAFG00000017359.2,ENSCAFG00000017365.1	.	5	0	5
30676471	T	TMEM100	intergenic	ENSCAFG00000017359.2,ENSCAFG00000017365.1	.	17	2	15
30676471	T,A	TMEM100	intergenic	ENSCAFG00000017359.2,ENSCAFG00000017365.1	.	1	0	1
30676471	T,C	TMEM100	intergenic	ENSCAFG00000017359.2,ENSCAFG00000017365.1	.	1	0	1
30676553	C	TMEM100	intergenic	ENSCAFG00000017359.2,ENSCAFG00000017365.1	.	18	2	16
30676574	C	TMEM100	intergenic	ENSCAFG00000017359.2,ENSCAFG00000017365.1	.	19	2	17
30676575	T	TMEM100	intergenic	ENSCAFG00000017359.2,ENSCAFG00000017365.1	.	19	2	17
30676622	A	TMEM100	intergenic	ENSCAFG00000017359.2,ENSCAFG00000017365.1	.	17	2	15
30676622	A,C	TMEM100	intergenic	ENSCAFG00000017359.2,ENSCAFG00000017365.1	.	1	0	1
30676628	CCTT	TMEM100	intergenic	ENSCAFG00000017359.2,ENSCAFG00000017365.1	.	2	0	2
30676628	CCTTCTTC	TMEM100	intergenic	ENSCAFG00000017359.2,ENSCAFG00000017365.1	.	17	2	15
30676630	TTCATCAT	TMEM100	intergenic	ENSCAFG00000017359.2,ENSCAFG00000017365.1	.	1	0	1
30676631	TCTGC	TMEM100	intergenic	ENSCAFG00000017359.2,ENSCAFG00000017365.1	.	1	0	1
30676632	CTTA	TMEM100	intergenic	ENSCAFG00000017359.2,ENSCAFG00000017365.1	.	1	0	1
30676680	A	TMEM100	intergenic	ENSCAFG00000017359.2,ENSCAFG00000017365.1	.	20	2	18
30676728	T	TMEM100	intergenic	ENSCAFG00000017359.2,ENSCAFG00000017365.1	.	20	2	18
30676953	T	TMEM100	intergenic	ENSCAFG00000017359.2,ENSCAFG00000017365.1	.	21	2	19
30677353	A	TMEM100	intergenic	ENSCAFG00000017359.2,ENSCAFG00000017365.1	.	22	2	20
30677739	TGG	TMEM100	intergenic	ENSCAFG00000017359.2,ENSCAFG00000017365.1	.	22	2	20
30677764	T	TMEM100	intergenic	ENSCAFG00000017359.2,ENSCAFG00000017365.1	.	21	2	19
30677764	T,A	TMEM100	intergenic	ENSCAFG00000017359.2,ENSCAFG00000017365.1	.	1	0	1
30677836	C	TMEM100	intergenic	ENSCAFG00000017359.2,ENSCAFG00000017365.1	.	22	2	20
30678000	C	TMEM100	intergenic	ENSCAFG00000017359.2,ENSCAFG00000017365.1	.	22	2	20
30678206	C	TMEM100	intergenic	ENSCAFG00000017359.2,ENSCAFG00000017365.1	.	1	0	1
30678206	CTTTTTTTT	TMEM100	intergenic	ENSCAFG00000017359.2,ENSCAFG00000017365.1	.	14	1	13
30678206	CTTTTTTTT,CTTTTTTTTT	TMEM100	intergenic	ENSCAFG00000017359.2,ENSCAFG00000017365.1	.	4	0	4
30678206	CTTTTTTTT,CTTTTTTTTTTT,CTTTTTTTTTTTT	TMEM100	intergenic	ENSCAFG00000017359.2,ENSCAFG00000017365.1	.	1	0	1
30678206	CTTTTTTTT,CTTTTTTTTTTTT	TMEM100	intergenic	ENSCAFG00000017359.2,ENSCAFG00000017365.1	.	0	1	-1
30678224	CT	TMEM100	intergenic	ENSCAFG00000017359.2,ENSCAFG00000017365.1	.	18	1	17
30678224	CTT	TMEM100	intergenic	ENSCAFG00000017359.2,ENSCAFG00000017365.1	.	1	0	1
30678267	A	TMEM100	intergenic	ENSCAFG00000017359.2,ENSCAFG00000017365.1	.	22	2	20
30678366	G	TMEM100	intergenic	ENSCAFG00000017359.2,ENSCAFG00000017365.1	.	22	2	20
30678530	GATACCTTCTCAAAAGTCCCCTGCTTTTTCTTGAGCCATAGACTTGCACTTTCAAATTTCCTACAGAATATCCACATATCTTTCTAGTGGAAGTCACCCTTTTCCATCA	TMEM100	intergenic	ENSCAFG00000017359.2,ENSCAFG00000017365.1	.	1	0	1
30678530	GATACCTTCTCAAAAGTCCCCTGCTTTTTCTTGAGCCATAGACTTGCACTTTCAAATTTCCTACAGAATATCCACATATCTTTCTAGTGGAAGTCACCCTTTTCCATCAGACTT	TMEM100	intergenic	ENSCAFG00000017359.2,ENSCAFG00000017365.1	.	1	0	1
30678632	G	TMEM100	intergenic	ENSCAFG00000017359.2,ENSCAFG00000017365.1	.	3	16	-13
30678664	CCTCTCTCTCTCT	TMEM100	intergenic	ENSCAFG00000017359.2,ENSCAFG00000017365.1	.	0	1	-1
30678677	G	TMEM100	intergenic	ENSCAFG00000017359.2,ENSCAFG00000017365.1	.	0	12	-12
30678807	A	TMEM100	intergenic	ENSCAFG00000017359.2,ENSCAFG00000017365.1	.	22	2	20
30678847	T	TMEM100	intergenic	ENSCAFG00000017359.2,ENSCAFG00000017365.1	.	22	2	20
30678899	A	TMEM100	intergenic	ENSCAFG00000017359.2,ENSCAFG00000017365.1	.	5	2	3
30678899	ATTTTT	TMEM100	intergenic	ENSCAFG00000017359.2,ENSCAFG00000017365.1	.	13	0	13
30678899	ATTTTT,ATTTT	TMEM100	intergenic	ENSCAFG00000017359.2,ENSCAFG00000017365.1	.	4	0	4
30679322	T	TMEM100	intergenic	ENSCAFG00000017359.2,ENSCAFG00000017365.1	.	22	2	20
30679468	C	TMEM100	intergenic	ENSCAFG00000017359.2,ENSCAFG00000017365.1	.	22	2	20
30679529	T	TMEM100	intergenic	ENSCAFG00000017359.2,ENSCAFG00000017365.1	.	22	2	20
30679747	C	TMEM100	intergenic	ENSCAFG00000017359.2,ENSCAFG00000017365.1	.	22	2	20
30679837	T	TMEM100	intergenic	ENSCAFG00000017359.2,ENSCAFG00000017365.1	.	11	20	-9
30679989	T	TMEM100	intergenic	ENSCAFG00000017359.2,ENSCAFG00000017365.1	.	22	2	20
30680257	A	TMEM100	intergenic	ENSCAFG00000017359.2,ENSCAFG00000017365.1	.	22	2	20
30680324	G	TMEM100	intergenic	ENSCAFG00000017359.2,ENSCAFG00000017365.1	.	22	2	20
30680353	G	TMEM100	intergenic	ENSCAFG00000017359.2,ENSCAFG00000017365.1	.	22	2	20
30680478	GCCCAGTGTGAC	TMEM100	intergenic	ENSCAFG00000017359.2,ENSCAFG00000017365.1	.	1	0	1
30680478	GGTCAGTGTGAA	TMEM100	intergenic	ENSCAFG00000017359.2,ENSCAFG00000017365.1	.	1	0	1
30680479	TTCAGTGTGACC	TMEM100	intergenic	ENSCAFG00000017359.2,ENSCAFG00000017365.1	.	6	0	6
30680479	TTCAGTGTGACCTCAG	TMEM100	intergenic	ENSCAFG00000017359.2,ENSCAFG00000017365.1	.	16	2	14
30680480	TCAGTGTGACCCCAG	TMEM100	intergenic	ENSCAFG00000017359.2,ENSCAFG00000017365.1	.	1	0	1
30680481	CAGTGTGACCTAAG	TMEM100	intergenic	ENSCAFG00000017359.2,ENSCAFG00000017365.1	.	2	0	2
30680483	GTGTGACCTCAA	TMEM100	intergenic	ENSCAFG00000017359.2,ENSCAFG00000017365.1	.	1	0	1
30680577	G	TMEM100	intergenic	ENSCAFG00000017359.2,ENSCAFG00000017365.1	.	22	2	20
30680706	T	TMEM100	intergenic	ENSCAFG00000017359.2,ENSCAFG00000017365.1	.	22	2	20
30681020	A	TMEM100	intergenic	ENSCAFG00000017359.2,ENSCAFG00000017365.1	.	14	1	13
30681098	A	TMEM100	intergenic	ENSCAFG00000017359.2,ENSCAFG00000017365.1	.	7	1	6
30681415	G	TMEM100	intergenic	ENSCAFG00000017359.2,ENSCAFG00000017365.1	.	1	0	1
30682777	A	TMEM100	intergenic	ENSCAFG00000017359.2,ENSCAFG00000017365.1	.	21	2	19
30682777	A,C	TMEM100	intergenic	ENSCAFG00000017359.2,ENSCAFG00000017365.1	.	1	0	1
30682987	C	TMEM100	intergenic	ENSCAFG00000017359.2,ENSCAFG00000017365.1	.	22	2	20
30683075	ACAGGAGC	TMEM100	intergenic	ENSCAFG00000017359.2,ENSCAFG00000017365.1	.	1	0	1
30683075	ACAGGAGCCAG	TMEM100	intergenic	ENSCAFG00000017359.2,ENSCAFG00000017365.1	.	20	2	18
30683077	AGGAGCCCG	TMEM100	intergenic	ENSCAFG00000017359.2,ENSCAFG00000017365.1	.	1	0	1
30683227	GTTTTTTTGTTTTTTTTGTTTTTTT	TMEM100	intergenic	ENSCAFG00000017359.2,ENSCAFG00000017365.1	.	1	0	1
30683233	TTTTTT	TMEM100	intergenic	ENSCAFG00000017359.2,ENSCAFG00000017365.1	.	3	0	3
30683234	TTTTT	TMEM100	intergenic	ENSCAFG00000017359.2,ENSCAFG00000017365.1	.	2	0	2
30683236	TTT	TMEM100	intergenic	ENSCAFG00000017359.2,ENSCAFG00000017365.1	.	1	0	1
30683239	T	TMEM100	intergenic	ENSCAFG00000017359.2,ENSCAFG00000017365.1	.	11	2	9
30683248	T	TMEM100	intergenic	ENSCAFG00000017359.2,ENSCAFG00000017365.1	.	15	0	15
30683268	ATCACCTTGCCTTTTAATTTTTTTTTTTTTTTT	TMEM100	intergenic	ENSCAFG00000017359.2,ENSCAFG00000017365.1	.	1	0	1
30683905	T	TMEM100	intergenic	ENSCAFG00000017359.2,ENSCAFG00000017365.1	.	17	1	16
30684006	G	TMEM100	intergenic	ENSCAFG00000017359.2,ENSCAFG00000017365.1	.	19	2	17
30684253	G	TMEM100	intergenic	ENSCAFG00000017359.2,ENSCAFG00000017365.1	.	22	2	20
30684470	G	TMEM100	intergenic	ENSCAFG00000017359.2,ENSCAFG00000017365.1	.	21	2	19
30684854	C	TMEM100	intergenic	ENSCAFG00000017359.2,ENSCAFG00000017365.1	.	22	2	20
30685091	G	TMEM100	intergenic	ENSCAFG00000017359.2,ENSCAFG00000017365.1	.	22	2	20
30685388	C	TMEM100	intergenic	ENSCAFG00000017359.2,ENSCAFG00000017365.1	.	0	1	-1
30685388	CCTCT,CCTCTCT	TMEM100	intergenic	ENSCAFG00000017359.2,ENSCAFG00000017365.1	.	3	0	3
30685388	CCTCTCT	TMEM100	intergenic	ENSCAFG00000017359.2,ENSCAFG00000017365.1	.	10	0	10
30685388	CCTCTCTCTCTCTCT	TMEM100	intergenic	ENSCAFG00000017359.2,ENSCAFG00000017365.1	.	0	1	-1
30685388	CCTCTCTCTCTCTCTCT	TMEM100	intergenic	ENSCAFG00000017359.2,ENSCAFG00000017365.1	.	1	11	-10
30685388	CCTCTCTCTCTCTCTCTCTCTCTCT	TMEM100	intergenic	ENSCAFG00000017359.2,ENSCAFG00000017365.1	.	9	2	7
30685389	CTCTCGTTCTC	TMEM100	intergenic	ENSCAFG00000017359.2,ENSCAFG00000017365.1	.	1	0	1
30685390	TCTCTCCCTCTC	TMEM100	intergenic	ENSCAFG00000017359.2,ENSCAFG00000017365.1	.	2	0	2
30685391	CACTCTA	TMEM100	intergenic	ENSCAFG00000017359.2,ENSCAFG00000017365.1	.	1	0	1
30685392	TCTCTCCCTCTC	TMEM100	intergenic	ENSCAFG00000017359.2,ENSCAFG00000017365.1	.	1	0	1
30685395	CTCTCTATCTCT	TMEM100	intergenic	ENSCAFG00000017359.2,ENSCAFG00000017365.1	.	1	0	1
30685396	TCCCTCGC	TMEM100	intergenic	ENSCAFG00000017359.2,ENSCAFG00000017365.1	.	1	0	1
30685396	TCTCTCCCTCTC	TMEM100	intergenic	ENSCAFG00000017359.2,ENSCAFG00000017365.1	.	1	0	1
30685398	TCTCTCGCTCTC	TMEM100	intergenic	ENSCAFG00000017359.2,ENSCAFG00000017365.1	.	1	0	1
30685399	CTCTCTATCTCT	TMEM100	intergenic	ENSCAFG00000017359.2,ENSCAFG00000017365.1	.	1	0	1
30685405	CTCTCTTT	TMEM100	intergenic	ENSCAFG00000017359.2,ENSCAFG00000017365.1	.	1	0	1
30685409	A	TMEM100	intergenic	ENSCAFG00000017359.2,ENSCAFG00000017365.1	.	22	2	20
30685409	CTCTTAATC	TMEM100	intergenic	ENSCAFG00000017359.2,ENSCAFG00000017365.1	.	1	0	1
30685409	CTCTTCATC	TMEM100	intergenic	ENSCAFG00000017359.2,ENSCAFG00000017365.1	.	1	0	1
30685411	CTTTATT	TMEM100	intergenic	ENSCAFG00000017359.2,ENSCAFG00000017365.1	.	1	0	1
30685580	G	TMEM100	intergenic	ENSCAFG00000017359.2,ENSCAFG00000017365.1	.	22	2	20
30687379	C	TMEM100	intergenic	ENSCAFG00000017359.2,ENSCAFG00000017365.1	.	14	0	14
30687869	C	TMEM100	intergenic	ENSCAFG00000017359.2,ENSCAFG00000017365.1	.	22	2	20
30688413	G	TMEM100	intergenic	ENSCAFG00000017359.2,ENSCAFG00000017365.1	.	11	2	9
30688640	AT	TMEM100	intergenic	ENSCAFG00000017359.2,ENSCAFG00000017365.1	.	1	0	1
30688640	ATTTT	TMEM100	intergenic	ENSCAFG00000017359.2,ENSCAFG00000017365.1	.	16	2	14
30688706	A	TMEM100	intergenic	ENSCAFG00000017359.2,ENSCAFG00000017365.1	.	21	2	19
30689244	C	TMEM100	intergenic	ENSCAFG00000017359.2,ENSCAFG00000017365.1	.	22	2	20
30690421	C	TMEM100	intergenic	ENSCAFG00000017359.2,ENSCAFG00000017365.1	.	22	2	20
30691146	C	TMEM100	intergenic	ENSCAFG00000017359.2,ENSCAFG00000017365.1	.	21	2	19
30691276	G	TMEM100	intergenic	ENSCAFG00000017359.2,ENSCAFG00000017365.1	.	20	2	18
30691516	A	TMEM100	intergenic	ENSCAFG00000017359.2,ENSCAFG00000017365.1	.	22	2	20
30691740	A	TMEM100	intergenic	ENSCAFG00000017359.2,ENSCAFG00000017365.1	.	22	2	20
30691811	C	TMEM100	intergenic	ENSCAFG00000017359.2,ENSCAFG00000017365.1	.	2	0	2
30691812	C	TMEM100	intergenic	ENSCAFG00000017359.2,ENSCAFG00000017365.1	.	3	0	3
30691812	CTCTGTCT	TMEM100	intergenic	ENSCAFG00000017359.2,ENSCAFG00000017365.1	.	19	2	17
30691820	GT	TMEM100	intergenic	ENSCAFG00000017359.2,ENSCAFG00000017365.1	.	1	0	1
30691838	T	TMEM100	intergenic	ENSCAFG00000017359.2,ENSCAFG00000017365.1	.	22	2	20
30691859	C	TMEM100	intergenic	ENSCAFG00000017359.2,ENSCAFG00000017365.1	.	22	2	20
30691940	G	TMEM100	intergenic	ENSCAFG00000017359.2,ENSCAFG00000017365.1	.	22	2	20
30691998	C	TMEM100	intergenic	ENSCAFG00000017359.2,ENSCAFG00000017365.1	.	0	1	-1
30692136	G	TMEM100	intergenic	ENSCAFG00000017359.2,ENSCAFG00000017365.1	.	1	2	-1
30692136	GGAGAGAGAGAGAGAGAGAGAGAGAGAGAGAGATAGAGAGAGAGAGAGAG	TMEM100	intergenic	ENSCAFG00000017359.2,ENSCAFG00000017365.1	.	1	7	-6
30692136	GGAGAGAGAGAGAGAGAGAGAGAGAGAGAGAGATAGAGAGAGAGAGAGAG,GGAGAGAGAGAGAGAGAGAGAGAGAGAGAGATAGAGAGAGAGAGAGAG	TMEM100	intergenic	ENSCAFG00000017359.2,ENSCAFG00000017365.1	.	0	1	-1
30692136	GGAGAGAGAGAGAGAGAGAGAGAGAGAGAGAGATAGAGAGAGAGAGAGAG,GGAGAGAGAGAGAGAGAGAGAGAGAGAGATAGAGAGAGAGAGAGAG	TMEM100	intergenic	ENSCAFG00000017359.2,ENSCAFG00000017365.1	.	0	1	-1
30692136	GGAGAGAGAGAGAGAGAGAGAGAGAGAGAGATAGAGAGAGAGAGAGAG	TMEM100	intergenic	ENSCAFG00000017359.2,ENSCAFG00000017365.1	.	0	4	-4
30692149	G	TMEM100	intergenic	ENSCAFG00000017359.2,ENSCAFG00000017365.1	.	1	0	1
30692151	G	TMEM100	intergenic	ENSCAFG00000017359.2,ENSCAFG00000017365.1	.	1	0	1
30692151	GAGAGAGAGAGAGAGAG	TMEM100	intergenic	ENSCAFG00000017359.2,ENSCAFG00000017365.1	.	9	0	9
30692153	G	TMEM100	intergenic	ENSCAFG00000017359.2,ENSCAFG00000017365.1	.	6	0	6
30692153	GAGAGAGAGAGAGAGAG	TMEM100	intergenic	ENSCAFG00000017359.2,ENSCAFG00000017365.1	.	11	1	10
30692165	GAGAGA	TMEM100	intergenic	ENSCAFG00000017359.2,ENSCAFG00000017365.1	.	0	1	-1
30693092	T	TMEM100	intergenic	ENSCAFG00000017359.2,ENSCAFG00000017365.1	.	21	2	19
30693746	T	TMEM100	intergenic	ENSCAFG00000017359.2,ENSCAFG00000017365.1	.	22	2	20
30694259	C	TMEM100	intergenic	ENSCAFG00000017359.2,ENSCAFG00000017365.1	.	0	14	-14
30694676	C	TMEM100	intergenic	ENSCAFG00000017359.2,ENSCAFG00000017365.1	.	0	14	-14
30694725	T	TMEM100	intergenic	ENSCAFG00000017359.2,ENSCAFG00000017365.1	.	0	2	-2
30694725	TA	TMEM100	intergenic	ENSCAFG00000017359.2,ENSCAFG00000017365.1	.	18	1	17
30694956	A	TMEM100	intergenic	ENSCAFG00000017359.2,ENSCAFG00000017365.1	.	22	2	20
30695174	A	TMEM100	intergenic	ENSCAFG00000017359.2,ENSCAFG00000017365.1	.	22	2	20
30696104	A	TMEM100	downstream	ENSCAFG00000017365.1	.	2	3	-1
30696104	ACC	TMEM100	downstream	ENSCAFG00000017365.1	.	1	0	1
30696210	A	TMEM100	downstream	ENSCAFG00000017365.1	.	21	2	19
30696342	A	TMEM100	downstream	ENSCAFG00000017365.1	.	13	2	11
30696342	ATTTTTTTT	TMEM100	downstream	ENSCAFG00000017365.1	.	8	0	8
30696342	ATTTTTTTT,ATTTTTTT	TMEM100	downstream	ENSCAFG00000017365.1	.	1	0	1
30696542	G	TMEM100	downstream	ENSCAFG00000017365.1	.	22	2	20
30696598	G	TMEM100	downstream	ENSCAFG00000017365.1	.	22	2	20
30696617	T	TMEM100	downstream	ENSCAFG00000017365.1	.	20	2	18
30696653	C	TMEM100	downstream	ENSCAFG00000017365.1	.	18	2	16
30697772	CT	TMEM100	upstream	ENSCAFG00000017365.1	.	1	1	0
30697772	CTTTTTT	TMEM100	upstream	ENSCAFG00000017365.1	.	21	1	20
30697851	CAAT	TMEM100	upstream	ENSCAFG00000017365.1	.	1	0	1
30697851	CAATAATAA	TMEM100	upstream	ENSCAFG00000017365.1	.	21	2	19
30697853	ATACTA	TMEM100	upstream	ENSCAFG00000017365.1	.	1	0	1
30697947	GAA	TMEM100	upstream	ENSCAFG00000017365.1	.	22	2	20
30698939	C	TMEM100,PCTP	intergenic	ENSCAFG00000017365.1,ENSCAFG00000017369.4	.	22	2	20
30699246	A	TMEM100,PCTP	intergenic	ENSCAFG00000017365.1,ENSCAFG00000017369.4	.	22	2	20
30699301	A	TMEM100,PCTP	intergenic	ENSCAFG00000017365.1,ENSCAFG00000017369.4	.	22	2	20
30699951	C	TMEM100,PCTP	intergenic	ENSCAFG00000017365.1,ENSCAFG00000017369.4	.	13	5	8
30699951	CTTTTTTTTTTTTT,CTTTTTTTTTTT,CTTTTTTTTTTTT	TMEM100,PCTP	intergenic	ENSCAFG00000017365.1,ENSCAFG00000017369.4	.	1	0	1
30700163	T	TMEM100,PCTP	intergenic	ENSCAFG00000017365.1,ENSCAFG00000017369.4	.	22	2	20
30700235	G	TMEM100,PCTP	intergenic	ENSCAFG00000017365.1,ENSCAFG00000017369.4	.	21	2	19
30700235	G,T	TMEM100,PCTP	intergenic	ENSCAFG00000017365.1,ENSCAFG00000017369.4	.	1	0	1
30700324	T	TMEM100,PCTP	intergenic	ENSCAFG00000017365.1,ENSCAFG00000017369.4	.	22	2	20
30700362	T	TMEM100,PCTP	intergenic	ENSCAFG00000017365.1,ENSCAFG00000017369.4	.	2	2	0
30700362	TA	TMEM100,PCTP	intergenic	ENSCAFG00000017365.1,ENSCAFG00000017369.4	.	4	1	3
30700712	A	TMEM100,PCTP	intergenic	ENSCAFG00000017365.1,ENSCAFG00000017369.4	.	22	2	20
30700775	G	TMEM100,PCTP	intergenic	ENSCAFG00000017365.1,ENSCAFG00000017369.4	.	22	2	20
30701037	T	TMEM100,PCTP	intergenic	ENSCAFG00000017365.1,ENSCAFG00000017369.4	.	22	2	20
30701129	C	TMEM100,PCTP	intergenic	ENSCAFG00000017365.1,ENSCAFG00000017369.4	.	22	2	20
30701325	A	TMEM100,PCTP	intergenic	ENSCAFG00000017365.1,ENSCAFG00000017369.4	.	22	2	20
30703688	A	TMEM100,PCTP	intergenic	ENSCAFG00000017365.1,ENSCAFG00000017369.4	.	22	2	20
30703749	T	TMEM100,PCTP	intergenic	ENSCAFG00000017365.1,ENSCAFG00000017369.4	.	22	2	20
30704272	T	TMEM100,PCTP	intergenic	ENSCAFG00000017365.1,ENSCAFG00000017369.4	.	22	2	20
30704612	G	TMEM100,PCTP	intergenic	ENSCAFG00000017365.1,ENSCAFG00000017369.4	.	1	0	1
30704781	G	TMEM100,PCTP	intergenic	ENSCAFG00000017365.1,ENSCAFG00000017369.4	.	19	2	17
30704794	T	TMEM100,PCTP	intergenic	ENSCAFG00000017365.1,ENSCAFG00000017369.4	.	0	1	-1
30704944	T	TMEM100,PCTP	intergenic	ENSCAFG00000017365.1,ENSCAFG00000017369.4	.	22	2	20
30705574	G	TMEM100,PCTP	intergenic	ENSCAFG00000017365.1,ENSCAFG00000017369.4	.	22	2	20
30705968	A	TMEM100,PCTP	intergenic	ENSCAFG00000017365.1,ENSCAFG00000017369.4	.	19	1	18
30705996	T	TMEM100,PCTP	intergenic	ENSCAFG00000017365.1,ENSCAFG00000017369.4	.	7	1	6
30706032	T	TMEM100,PCTP	intergenic	ENSCAFG00000017365.1,ENSCAFG00000017369.4	.	20	1	19
30706688	T	TMEM100,PCTP	intergenic	ENSCAFG00000017365.1,ENSCAFG00000017369.4	.	1	0	1
30707091	G	TMEM100,PCTP	intergenic	ENSCAFG00000017365.1,ENSCAFG00000017369.4	.	22	2	20
30707690	T	TMEM100,PCTP	intergenic	ENSCAFG00000017365.1,ENSCAFG00000017369.4	.	22	2	20
30708532	T	TMEM100,PCTP	intergenic	ENSCAFG00000017365.1,ENSCAFG00000017369.4	.	2	2	0
30708532	TAAAAAAAAAAAA	TMEM100,PCTP	intergenic	ENSCAFG00000017365.1,ENSCAFG00000017369.4	.	1	0	1
30708532	TAAAAAAAAAAAA,TAAAAAAAAAAA	TMEM100,PCTP	intergenic	ENSCAFG00000017365.1,ENSCAFG00000017369.4	.	3	0	3
30708532	TAAAAAAAAAAAA,TAAAAAAAAAAA,TAAAAAAAAAA	TMEM100,PCTP	intergenic	ENSCAFG00000017365.1,ENSCAFG00000017369.4	.	1	0	1
30708532	TAAAAAAAAAAAA,TAAAAAAAAAAA,TAAAAAAAAAAAAA	TMEM100,PCTP	intergenic	ENSCAFG00000017365.1,ENSCAFG00000017369.4	.	3	0	3
30708545	AAATAATA	TMEM100,PCTP	intergenic	ENSCAFG00000017365.1,ENSCAFG00000017369.4	.	1	0	1
30708634	TCA	TMEM100,PCTP	intergenic	ENSCAFG00000017365.1,ENSCAFG00000017369.4	.	19	2	17
30708707	GTTT	TMEM100,PCTP	intergenic	ENSCAFG00000017365.1,ENSCAFG00000017369.4	.	20	2	18
30708830	A	TMEM100,PCTP	intergenic	ENSCAFG00000017365.1,ENSCAFG00000017369.4	.	22	2	20
30708948	A	TMEM100,PCTP	intergenic	ENSCAFG00000017365.1,ENSCAFG00000017369.4	.	22	2	20
30708992	A	TMEM100,PCTP	intergenic	ENSCAFG00000017365.1,ENSCAFG00000017369.4	.	22	2	20
30709054	G	TMEM100,PCTP	intergenic	ENSCAFG00000017365.1,ENSCAFG00000017369.4	.	22	2	20
30709121	C	TMEM100,PCTP	intergenic	ENSCAFG00000017365.1,ENSCAFG00000017369.4	.	22	2	20
30709760	A	TMEM100,PCTP	intergenic	ENSCAFG00000017365.1,ENSCAFG00000017369.4	.	19	2	17
30709760	ATTTTTTTTT	TMEM100,PCTP	intergenic	ENSCAFG00000017365.1,ENSCAFG00000017369.4	.	1	0	1
30709979	A	TMEM100,PCTP	intergenic	ENSCAFG00000017365.1,ENSCAFG00000017369.4	.	16	2	14
30709979	ATTTTTTTTT	TMEM100,PCTP	intergenic	ENSCAFG00000017365.1,ENSCAFG00000017369.4	.	3	0	3
30710527	T	TMEM100,PCTP	intergenic	ENSCAFG00000017365.1,ENSCAFG00000017369.4	.	22	2	20
30712031	A	TMEM100,PCTP	intergenic	ENSCAFG00000017365.1,ENSCAFG00000017369.4	.	0	2	-2
30712032	A	TMEM100,PCTP	intergenic	ENSCAFG00000017365.1,ENSCAFG00000017369.4	.	21	2	19
30712033	A	TMEM100,PCTP	intergenic	ENSCAFG00000017365.1,ENSCAFG00000017369.4	.	1	0	1
30712246	G	TMEM100,PCTP	intergenic	ENSCAFG00000017365.1,ENSCAFG00000017369.4	.	22	2	20
30713249	A	TMEM100,PCTP	intergenic	ENSCAFG00000017365.1,ENSCAFG00000017369.4	.	0	1	-1
30713251	A	TMEM100,PCTP	intergenic	ENSCAFG00000017365.1,ENSCAFG00000017369.4	.	21	2	19
30713490	CATTAT	TMEM100,PCTP	intergenic	ENSCAFG00000017365.1,ENSCAFG00000017369.4	.	16	2	14
30714142	TTTTATTTATTTATTTATTTATTTATTTATTTATTTATTTAT	TMEM100,PCTP	intergenic	ENSCAFG00000017365.1,ENSCAFG00000017369.4	.	0	1	-1
30714178	ATT,ATTT	TMEM100,PCTP	intergenic	ENSCAFG00000017365.1,ENSCAFG00000017369.4	.	1	0	1
30714180	T	TMEM100,PCTP	intergenic	ENSCAFG00000017365.1,ENSCAFG00000017369.4	.	1	0	1
30714181	AT	TMEM100,PCTP	intergenic	ENSCAFG00000017365.1,ENSCAFG00000017369.4	.	1	0	1
30714341	G	TMEM100,PCTP	intergenic	ENSCAFG00000017365.1,ENSCAFG00000017369.4	.	6	2	4
30714341	G,T	TMEM100,PCTP	intergenic	ENSCAFG00000017365.1,ENSCAFG00000017369.4	.	1	0	1
30714537	G	TMEM100,PCTP	intergenic	ENSCAFG00000017365.1,ENSCAFG00000017369.4	.	20	2	18
30715144	GAAAA	TMEM100,PCTP	intergenic	ENSCAFG00000017365.1,ENSCAFG00000017369.4	.	3	0	3
30715144	GAAAA,GAA	TMEM100,PCTP	intergenic	ENSCAFG00000017365.1,ENSCAFG00000017369.4	.	1	0	1
30715147	A,AATT		.	.	.	1	0	1
30715147	AATT,AATTT		.	.	.	1	0	1
30715148	A	TMEM100,PCTP	intergenic	ENSCAFG00000017365.1,ENSCAFG00000017369.4	.	1	0	1
30715149	T	TMEM100,PCTP	intergenic	ENSCAFG00000017365.1,ENSCAFG00000017369.4	.	10	1	9
30715447	G	TMEM100,PCTP	intergenic	ENSCAFG00000017365.1,ENSCAFG00000017369.4	.	21	1	20
30715638	T	TMEM100,PCTP	intergenic	ENSCAFG00000017365.1,ENSCAFG00000017369.4	.	22	1	21
30715869	ATTT	TMEM100,PCTP	intergenic	ENSCAFG00000017365.1,ENSCAFG00000017369.4	.	24	24	0
30715937	C	TMEM100,PCTP	intergenic	ENSCAFG00000017365.1,ENSCAFG00000017369.4	.	22	2	20
30716068	C	TMEM100,PCTP	intergenic	ENSCAFG00000017365.1,ENSCAFG00000017369.4	.	22	2	20
30716390	A	TMEM100,PCTP	intergenic	ENSCAFG00000017365.1,ENSCAFG00000017369.4	.	16	2	14
30716454	A	TMEM100,PCTP	intergenic	ENSCAFG00000017365.1,ENSCAFG00000017369.4	.	14	2	12
30717344	A	TMEM100,PCTP	intergenic	ENSCAFG00000017365.1,ENSCAFG00000017369.4	.	22	2	20
30717774	G	TMEM100,PCTP	intergenic	ENSCAFG00000017365.1,ENSCAFG00000017369.4	.	0	14	-14
30717928	C	TMEM100,PCTP	intergenic	ENSCAFG00000017365.1,ENSCAFG00000017369.4	.	22	15	7
30718253	AACACACACACACACACACACACACACACACACACACACACAC	TMEM100,PCTP	intergenic	ENSCAFG00000017365.1,ENSCAFG00000017369.4	.	0	1	-1
30718253	AACACACACACACACACACACACACACACACACACACACACAC,AACACACACACACACACACACACACACACACACACAC	TMEM100,PCTP	intergenic	ENSCAFG00000017365.1,ENSCAFG00000017369.4	.	0	1	-1
30718253	AACACACACACACACACACACACACACACACACACACACACAC,AACACACACACACACACACACACACACACACACACACACACACAC	TMEM100,PCTP	intergenic	ENSCAFG00000017365.1,ENSCAFG00000017369.4	.	0	1	-1
30718253	AACACACACACACACACACACACACACACACACACACACACAC,AACACACACACACACACACACACACACACACACACACACACACAC,AACACACACACACACACACACACACACACACACACACAC	TMEM100,PCTP	intergenic	ENSCAFG00000017365.1,ENSCAFG00000017369.4	.	0	1	-1
30718253	AACACACACACACACACACACACACACACACACACACACACACAC	TMEM100,PCTP	intergenic	ENSCAFG00000017365.1,ENSCAFG00000017369.4	.	3	1	2
30718253	AACACACACACACACACACACACACACACACACACACACACACAC,AACACACACACACACACACACACACACACACACAC,AACACACACACACACACACACACACACACACACACACACACAC	TMEM100,PCTP	intergenic	ENSCAFG00000017365.1,ENSCAFG00000017369.4	.	1	0	1
30718253	AACACACACACACACACACACACACACACACACACACACACACAC,AACACACACACACACACACACACACACACACACACACACACAC	TMEM100,PCTP	intergenic	ENSCAFG00000017365.1,ENSCAFG00000017369.4	.	2	0	2
30718253	AACACACACACACACACACACACACACACACACACACACACACAC,AACACACACACACACACACACACACACACACACACACACACAC,AACACACACACACACACACACACACACACACACACACACACACACAC	TMEM100,PCTP	intergenic	ENSCAFG00000017365.1,ENSCAFG00000017369.4	.	0	1	-1
30718258	ACACCCAC	TMEM100,PCTP	intergenic	ENSCAFG00000017365.1,ENSCAFG00000017369.4	.	0	1	-1
30718278	ACACGCAC	TMEM100,PCTP	intergenic	ENSCAFG00000017365.1,ENSCAFG00000017369.4	.	0	1	-1
30718624	A	TMEM100,PCTP	intergenic	ENSCAFG00000017365.1,ENSCAFG00000017369.4	.	1	0	1
30718789	G	TMEM100,PCTP	intergenic	ENSCAFG00000017365.1,ENSCAFG00000017369.4	.	1	0	1
30718790	A	TMEM100,PCTP	intergenic	ENSCAFG00000017365.1,ENSCAFG00000017369.4	.	17	2	15
30718944	G	TMEM100,PCTP	intergenic	ENSCAFG00000017365.1,ENSCAFG00000017369.4	.	22	2	20
30718969	C	TMEM100,PCTP	intergenic	ENSCAFG00000017365.1,ENSCAFG00000017369.4	.	0	14	-14
30718986	AATTTATT	TMEM100,PCTP	intergenic	ENSCAFG00000017365.1,ENSCAFG00000017369.4	.	22	2	20
30719042	T	TMEM100,PCTP	intergenic	ENSCAFG00000017365.1,ENSCAFG00000017369.4	.	22	15	7
30719053	A	TMEM100,PCTP	intergenic	ENSCAFG00000017365.1,ENSCAFG00000017369.4	.	22	2	20
30719730	T	TMEM100,PCTP	intergenic	ENSCAFG00000017365.1,ENSCAFG00000017369.4	.	5	0	5
30719943	C	TMEM100,PCTP	intergenic	ENSCAFG00000017365.1,ENSCAFG00000017369.4	.	4	5	-1
30719951	A	TMEM100,PCTP	intergenic	ENSCAFG00000017365.1,ENSCAFG00000017369.4	.	12	6	6
30719956	C	TMEM100,PCTP	intergenic	ENSCAFG00000017365.1,ENSCAFG00000017369.4	.	18	6	12
30719956	C,T	TMEM100,PCTP	intergenic	ENSCAFG00000017365.1,ENSCAFG00000017369.4	.	0	1	-1
30719956	T	TMEM100,PCTP	intergenic	ENSCAFG00000017365.1,ENSCAFG00000017369.4	.	0	12	-12
30719956	T,C	TMEM100,PCTP	intergenic	ENSCAFG00000017365.1,ENSCAFG00000017369.4	.	0	1	-1
30719963	T	TMEM100,PCTP	intergenic	ENSCAFG00000017365.1,ENSCAFG00000017369.4	.	19	16	3
30719988	A	TMEM100,PCTP	intergenic	ENSCAFG00000017365.1,ENSCAFG00000017369.4	.	23	22	1
30719997	T	TMEM100,PCTP	intergenic	ENSCAFG00000017365.1,ENSCAFG00000017369.4	.	23	23	0
30719999	A	TMEM100,PCTP	intergenic	ENSCAFG00000017365.1,ENSCAFG00000017369.4	.	23	22	1
30720025	A	TMEM100,PCTP	intergenic	ENSCAFG00000017365.1,ENSCAFG00000017369.4	.	24	22	2
30720049	T	TMEM100,PCTP	intergenic	ENSCAFG00000017365.1,ENSCAFG00000017369.4	.	24	23	1
30720056	T	TMEM100,PCTP	intergenic	ENSCAFG00000017365.1,ENSCAFG00000017369.4	.	24	24	0
30720079	T	TMEM100,PCTP	intergenic	ENSCAFG00000017365.1,ENSCAFG00000017369.4	.	24	23	1
30720124	G	TMEM100,PCTP	intergenic	ENSCAFG00000017365.1,ENSCAFG00000017369.4	.	24	23	1
30720142	T	TMEM100,PCTP	intergenic	ENSCAFG00000017365.1,ENSCAFG00000017369.4	.	0	14	-14
30720147	G	TMEM100,PCTP	intergenic	ENSCAFG00000017365.1,ENSCAFG00000017369.4	.	0	14	-14
30720251	C	TMEM100,PCTP	intergenic	ENSCAFG00000017365.1,ENSCAFG00000017369.4	.	20	23	-3
30720260	T	TMEM100,PCTP	intergenic	ENSCAFG00000017365.1,ENSCAFG00000017369.4	.	19	19	0
30720266	G	TMEM100,PCTP	intergenic	ENSCAFG00000017365.1,ENSCAFG00000017369.4	.	20	20	0
30720277	C	TMEM100,PCTP	intergenic	ENSCAFG00000017365.1,ENSCAFG00000017369.4	.	15	19	-4
30720278	A	TMEM100,PCTP	intergenic	ENSCAFG00000017365.1,ENSCAFG00000017369.4	.	15	18	-3
30720387	G	TMEM100,PCTP	intergenic	ENSCAFG00000017365.1,ENSCAFG00000017369.4	.	0	14	-14
30720441	T	TMEM100,PCTP	intergenic	ENSCAFG00000017365.1,ENSCAFG00000017369.4	.	22	15	7
30720451	G	TMEM100,PCTP	intergenic	ENSCAFG00000017365.1,ENSCAFG00000017369.4	.	0	14	-14
30720503	C	TMEM100,PCTP	intergenic	ENSCAFG00000017365.1,ENSCAFG00000017369.4	.	22	2	20
30720542	A	TMEM100,PCTP	intergenic	ENSCAFG00000017365.1,ENSCAFG00000017369.4	.	0	14	-14
30720544	T	TMEM100,PCTP	intergenic	ENSCAFG00000017365.1,ENSCAFG00000017369.4	.	0	14	-14
30720832	A	TMEM100,PCTP	intergenic	ENSCAFG00000017365.1,ENSCAFG00000017369.4	.	0	2	-2
30720832	AGGG	TMEM100,PCTP	intergenic	ENSCAFG00000017365.1,ENSCAFG00000017369.4	.	0	12	-12
30720856	T	TMEM100,PCTP	intergenic	ENSCAFG00000017365.1,ENSCAFG00000017369.4	.	0	14	-14
30720871	T	TMEM100,PCTP	intergenic	ENSCAFG00000017365.1,ENSCAFG00000017369.4	.	22	2	20
30720885	T	TMEM100,PCTP	intergenic	ENSCAFG00000017365.1,ENSCAFG00000017369.4	.	0	14	-14
30720887	C	TMEM100,PCTP	intergenic	ENSCAFG00000017365.1,ENSCAFG00000017369.4	.	0	14	-14
30720978	TA	TMEM100,PCTP	intergenic	ENSCAFG00000017365.1,ENSCAFG00000017369.4	.	0	3	-3
30720980	A	TMEM100,PCTP	intergenic	ENSCAFG00000017365.1,ENSCAFG00000017369.4	.	1	3	-2
30720984	G	TMEM100,PCTP	intergenic	ENSCAFG00000017365.1,ENSCAFG00000017369.4	.	0	3	-3
30721002	G	TMEM100,PCTP	intergenic	ENSCAFG00000017365.1,ENSCAFG00000017369.4	.	0	3	-3
30721090	A	TMEM100,PCTP	intergenic	ENSCAFG00000017365.1,ENSCAFG00000017369.4	.	17	16	1
30721180	A	TMEM100,PCTP	intergenic	ENSCAFG00000017365.1,ENSCAFG00000017369.4	.	19	22	-3
30721389	T	TMEM100,PCTP	intergenic	ENSCAFG00000017365.1,ENSCAFG00000017369.4	.	23	22	1
30721419	TG	TMEM100,PCTP	intergenic	ENSCAFG00000017365.1,ENSCAFG00000017369.4	.	3	16	-13
30721419	TGGGGGGG	TMEM100,PCTP	intergenic	ENSCAFG00000017365.1,ENSCAFG00000017369.4	.	21	5	16
30721500	G	TMEM100,PCTP	intergenic	ENSCAFG00000017365.1,ENSCAFG00000017369.4	.	24	24	0
30721543	A	TMEM100,PCTP	intergenic	ENSCAFG00000017365.1,ENSCAFG00000017369.4	.	23	20	3
30721627	G	TMEM100,PCTP	intergenic	ENSCAFG00000017365.1,ENSCAFG00000017369.4	.	21	20	1
30721742	A	TMEM100,PCTP	intergenic	ENSCAFG00000017365.1,ENSCAFG00000017369.4	.	3	14	-11
30721745	G	TMEM100,PCTP	intergenic	ENSCAFG00000017365.1,ENSCAFG00000017369.4	.	3	15	-12
30721840	G	TMEM100,PCTP	intergenic	ENSCAFG00000017365.1,ENSCAFG00000017369.4	.	1	13	-12
30722032	A	TMEM100,PCTP	intergenic	ENSCAFG00000017365.1,ENSCAFG00000017369.4	.	0	8	-8
30723941	G	TMEM100,PCTP	intergenic	ENSCAFG00000017365.1,ENSCAFG00000017369.4	.	0	13	-13
30724415	C	PCTP	upstream	ENSCAFG00000017369.4	.	0	10	-10
30724576	T	PCTP	upstream	ENSCAFG00000017369.4	.	0	3	-3
30724585	A	PCTP	upstream	ENSCAFG00000017369.4	.	8	1	7
30724592	T	PCTP	upstream	ENSCAFG00000017369.4	.	9	1	8
30724595	T	PCTP	upstream	ENSCAFG00000017369.4	.	8	2	6
30724595	T,G	PCTP	upstream	ENSCAFG00000017369.4	.	1	0	1
30724982	C	PCTP	upstream	ENSCAFG00000017369.4	.	19	2	17
30725102	C	PCTP	upstream	ENSCAFG00000017369.4	.	3	0	3
30725107	CCG	PCTP	upstream	ENSCAFG00000017369.4	.	1	0	1
30725114	C	PCTP	upstream	ENSCAFG00000017369.4	.	1	0	1
30725119	GCCCCC	PCTP	upstream	ENSCAFG00000017369.4	.	0	1	-1
30725125	C	PCTP	upstream	ENSCAFG00000017369.4	.	2	0	2
30725496	C	PCTP	intronic	ENSCAFG00000017369.4	.	20	15	5
30725624	A	PCTP	intronic	ENSCAFG00000017369.4	.	22	15	7
30725666	C	PCTP	intronic	ENSCAFG00000017369.4	.	22	15	7
30725674	T	PCTP	intronic	ENSCAFG00000017369.4	.	1	0	1
30725674	TG	PCTP	intronic	ENSCAFG00000017369.4	.	2	2	0
30725676	T	PCTP	intronic	ENSCAFG00000017369.4	.	22	15	7
30725917	C	PCTP	intronic	ENSCAFG00000017369.4	.	18	11	7
30725917	C,G	PCTP	intronic	ENSCAFG00000017369.4	.	1	0	1
30725920	CCCCCCAACCGCCCCCCCCCGCCCCC	PCTP	intronic	ENSCAFG00000017369.4	.	0	1	-1
30725921	CCCCAACCGCCCCCCCCCGTCCCC,CCCCCAACCGCCCCCCCCCGTCCCC	PCTP	intronic	ENSCAFG00000017369.4	.	0	1	-1
30725921	CCCCAACCGCCCCCCCCCGTCCCC,CCCCCAACCGCCCCCCCCCGTCCCC,CCCCAACCGCCCCCCCCGTCCCC		.	.	.	0	1	-1
30725921	CCCCAACCGCCCCCCCCCGTCCCCC,CCCCCAACCGCCCCCCCCCGTCCCCC,CCCCCCAACCGCCCCCCCCCCGTCCCCC	PCTP	intronic	ENSCAFG00000017369.4	.	1	0	1
30725921	CCCCCAACCGCCCCCCCCCGTCCCC	PCTP	intronic	ENSCAFG00000017369.4	.	10	6	4
30725921	CCCCCAACCGCCCCCCCCCGTCCCC,CCCCAAACCCCCCCCCCGTCCCC,CCCCAACCGCCCCCCCCCGTCCCC		.	.	.	1	0	1
30725921	CCCCCAACCGCCCCCCCCCGTCCCC,CCCCAACCGCCCCCCCCCGTCCCC		.	.	.	2	0	2
30725921	CCCCCAACCGCCCCCCCCCGTCCCC,CCCCCAACCGCCCCCCCCCCGTCCCC	PCTP	intronic	ENSCAFG00000017369.4	.	0	1	-1
30725921	CCCCCAACCGCCCCCCCCCGTCCCCC		.	.	.	1	0	1
30725921	CCCCCAACCGCCCCCCCCCGTCCCCC,CCCCCAACCGCCCCCCCCGTCCCCC		.	.	.	0	1	-1
30725921	CCCCCAACCGCCCCCCCCCGTCCCCC,CCCCCAACCGCCCCCCCCGTCCCCC,CCCCCCAACCGCCCCCCCCCGTCCCCC	PCTP	intronic	ENSCAFG00000017369.4	.	1	0	1
30725921	CCCCCAACCGCCCCCCCCCGTCCCCC,CCCCCCAACCGCCCCCCCCCGTCCCCC	PCTP	intronic	ENSCAFG00000017369.4	.	2	0	2
30726046	A	PCTP	intronic	ENSCAFG00000017369.4	.	22	15	7
30726111	A	PCTP	intronic	ENSCAFG00000017369.4	.	21	14	7
30726111	AT	PCTP	intronic	ENSCAFG00000017369.4	.	1	0	1
30726440	G	PCTP	intronic	ENSCAFG00000017369.4	.	22	15	7
30726588	A	PCTP	intronic	ENSCAFG00000017369.4	.	21	14	7
30726664	G	PCTP	intronic	ENSCAFG00000017369.4	.	20	15	5
30726671	T	PCTP	intronic	ENSCAFG00000017369.4	.	20	14	6
30726682	CTAAATAAATAAAT	PCTP	intronic	ENSCAFG00000017369.4	.	20	15	5
30726713	T	PCTP	intronic	ENSCAFG00000017369.4	.	18	14	4
30726865	A	PCTP	intronic	ENSCAFG00000017369.4	.	5	6	-1
30726865	A,C	PCTP	intronic	ENSCAFG00000017369.4	.	1	0	1
30726922	A	PCTP	intronic	ENSCAFG00000017369.4	.	3	4	-1
30727071	G	PCTP	intronic	ENSCAFG00000017369.4	.	12	7	5
30727128	A	PCTP	intronic	ENSCAFG00000017369.4	.	16	9	7
30727211	C	PCTP	intronic	ENSCAFG00000017369.4	.	21	15	6
30727488	C	PCTP	intronic	ENSCAFG00000017369.4	.	0	2	-2
30727575	T	PCTP	intronic	ENSCAFG00000017369.4	.	0	15	-15
30727653	G	PCTP	intronic	ENSCAFG00000017369.4	.	2	22	-20
30727675	G	PCTP	intronic	ENSCAFG00000017369.4	.	20	24	-4
30727680	G	PCTP	intronic	ENSCAFG00000017369.4	.	17	5	12
30727763	T	PCTP	intronic	ENSCAFG00000017369.4	.	2	24	-22
30727797	C	PCTP	intronic	ENSCAFG00000017369.4	.	0	1	-1
30727803	AG	PCTP	intronic	ENSCAFG00000017369.4	.	0	1	-1
30727803	AGGG	PCTP	intronic	ENSCAFG00000017369.4	.	2	23	-21
30727867	G	PCTP	intronic	ENSCAFG00000017369.4	.	2	24	-22
30727907	T	PCTP	intronic	ENSCAFG00000017369.4	.	2	24	-22
30728164	T	PCTP	intronic	ENSCAFG00000017369.4	.	2	24	-22
30728224	G	PCTP	intronic	ENSCAFG00000017369.4	.	3	1	2
30728229	A	PCTP	intronic	ENSCAFG00000017369.4	.	5	24	-19
30728330	A	PCTP	intronic	ENSCAFG00000017369.4	.	17	4	13
30728476	C	PCTP	intronic	ENSCAFG00000017369.4	.	18	11	7
30728476	C,A	PCTP	intronic	ENSCAFG00000017369.4	.	1	0	1
30728562	C	PCTP	intronic	ENSCAFG00000017369.4	.	22	24	-2
30728564	G	PCTP	intronic	ENSCAFG00000017369.4	.	22	24	-2
30728566	A	PCTP	intronic	ENSCAFG00000017369.4	.	22	24	-2
30728594	T	PCTP	intronic	ENSCAFG00000017369.4	.	2	24	-22
30728620	G	PCTP	intronic	ENSCAFG00000017369.4	.	22	24	-2
30728685	A	PCTP	intronic	ENSCAFG00000017369.4	.	22	15	7
30728712	C	PCTP	intronic	ENSCAFG00000017369.4	.	2	24	-22
30728804	A	PCTP	intronic	ENSCAFG00000017369.4	.	2	24	-22
30728820	C	PCTP	intronic	ENSCAFG00000017369.4	.	2	24	-22
30728839	T	PCTP	intronic	ENSCAFG00000017369.4	.	2	24	-22
30728907	G	PCTP	intronic	ENSCAFG00000017369.4	.	21	24	-3
30728907	G,T	PCTP	intronic	ENSCAFG00000017369.4	.	1	0	1
30728963	T	PCTP	intronic	ENSCAFG00000017369.4	.	0	4	-4
30728972	C	PCTP	intronic	ENSCAFG00000017369.4	.	7	5	2
30728975	C	PCTP	intronic	ENSCAFG00000017369.4	.	1	0	1
30728976	C	PCTP	intronic	ENSCAFG00000017369.4	.	5	5	0
30729138	C	PCTP	intronic	ENSCAFG00000017369.4	.	12	10	2
30729503	T	PCTP	intronic	ENSCAFG00000017369.4	.	12	10	2
30729511	C	PCTP	intronic	ENSCAFG00000017369.4	.	9	10	-1
30729511	C,T	PCTP	intronic	ENSCAFG00000017369.4	.	1	0	1
30729747	G	PCTP	intronic	ENSCAFG00000017369.4	.	1	1	0
30729747	GTTT	PCTP	intronic	ENSCAFG00000017369.4	.	21	14	7
30729847	G	PCTP	intronic	ENSCAFG00000017369.4	.	22	15	7
30729980	C	PCTP	intronic	ENSCAFG00000017369.4	.	22	15	7
30730038	CTTTTT	PCTP	intronic	ENSCAFG00000017369.4	.	22	15	7
30730131	T	PCTP	intronic	ENSCAFG00000017369.4	.	22	15	7
30730136	C	PCTP	intronic	ENSCAFG00000017369.4	.	22	15	7
30730231	C	PCTP	intronic	ENSCAFG00000017369.4	.	22	15	7
30730380	A	PCTP	intronic	ENSCAFG00000017369.4	.	22	15	7
30730729	T	PCTP	intronic	ENSCAFG00000017369.4	.	22	15	7
30730801	A	PCTP	intronic	ENSCAFG00000017369.4	.	22	15	7
30731211	CT	PCTP	intronic	ENSCAFG00000017369.4	.	3	2	1
30731255	AT	PCTP	intronic	ENSCAFG00000017369.4	.	2	1	1
30731362	C	PCTP	intronic	ENSCAFG00000017369.4	.	2	0	2
30731365	T	PCTP	intronic	ENSCAFG00000017369.4	.	2	0	2
30731388	C	PCTP	intronic	ENSCAFG00000017369.4	.	3	3	0
30731403	C	PCTP	intronic	ENSCAFG00000017369.4	.	2	2	0
30732019	C	PCTP	intronic	ENSCAFG00000017369.4	.	22	15	7
30732668	T	PCTP	intronic	ENSCAFG00000017369.4	.	22	15	7
30732714	T	PCTP	intronic	ENSCAFG00000017369.4	.	22	15	7
30732950	TA	PCTP	intronic	ENSCAFG00000017369.4	.	22	15	7
30732987	A	PCTP	intronic	ENSCAFG00000017369.4	.	22	15	7
30733122	G	PCTP	intronic	ENSCAFG00000017369.4	.	22	15	7
30733157	GA	PCTP	intronic	ENSCAFG00000017369.4	.	22	15	7
30733297	A	PCTP	intronic	ENSCAFG00000017369.4	.	22	15	7
30733306	ATTTT	PCTP	intronic	ENSCAFG00000017369.4	.	22	15	7
30733362	G	PCTP	intronic	ENSCAFG00000017369.4	.	0	1	-1
30733374	C	PCTP	intronic	ENSCAFG00000017369.4	.	0	2	-2
30733394	C	PCTP	intronic	ENSCAFG00000017369.4	.	0	8	-8
30733397	T	PCTP	intronic	ENSCAFG00000017369.4	.	0	8	-8
30733398	G	PCTP	intronic	ENSCAFG00000017369.4	.	0	9	-9
30733437	G	PCTP	intronic	ENSCAFG00000017369.4	.	2	19	-17
30733478	T	PCTP	intronic	ENSCAFG00000017369.4	.	2	22	-20
30733548	T	PCTP	intronic	ENSCAFG00000017369.4	.	2	24	-22
30733811	C	PCTP	intronic	ENSCAFG00000017369.4	.	22	15	7
30733816	C	PCTP	intronic	ENSCAFG00000017369.4	.	22	15	7
30733819	T	PCTP	intronic	ENSCAFG00000017369.4	.	1	22	-21
30733851	TC	PCTP	intronic	ENSCAFG00000017369.4	.	1	21	-20
30733854	T	PCTP	intronic	ENSCAFG00000017369.4	.	22	24	-2
30733862	C	PCTP	intronic	ENSCAFG00000017369.4	.	1	19	-18
30733889	G	PCTP	intronic	ENSCAFG00000017369.4	.	0	6	-6
30734091	C	PCTP	intronic	ENSCAFG00000017369.4	.	22	14	8
30734275	A	PCTP	intronic	ENSCAFG00000017369.4	.	22	15	7
30734346	G	PCTP	intronic	ENSCAFG00000017369.4	.	22	15	7
30734428	T	PCTP	intronic	ENSCAFG00000017369.4	.	22	15	7
30734913	G	PCTP	intronic	ENSCAFG00000017369.4	.	22	15	7
30736809	A	PCTP	intronic	ENSCAFG00000017369.4	.	22	15	7
30736914	A	PCTP	intronic	ENSCAFG00000017369.4	.	22	15	7
30737328	A	PCTP	intronic	ENSCAFG00000017369.4	.	22	15	7
30737580	T	PCTP	intronic	ENSCAFG00000017369.4	.	0	13	-13
30737809	A	PCTP	intronic	ENSCAFG00000017369.4	.	21	14	7
30738011	CAGAGAGAGAGAGAGAGAGAG,CAGAGAGAGAGAGAGAGAG,CAGAGAGAGAGAGAGAGAGAGAG	PCTP	intronic	ENSCAFG00000017369.4	.	0	1	-1
30738011	CAGAGAGAGAGAGAGAGAGAGAGAGAG	PCTP	intronic	ENSCAFG00000017369.4	.	1	0	1
30738011	CAGAGAGAGAGAGAGAGAGAGAGAGAGAG	PCTP	intronic	ENSCAFG00000017369.4	.	1	0	1
30738011	CAGAGAGAGAGAGAGAGAGAGAGAGAGAG,CAGAGAGAGAGAGAGAGAGAGAGAGAG	PCTP	intronic	ENSCAFG00000017369.4	.	1	0	1
30738014	AGAGGGAG	PCTP	intronic	ENSCAFG00000017369.4	.	1	0	1
30738071	G	PCTP	intronic	ENSCAFG00000017369.4	.	5	4	1
30738088	C	PCTP	intronic	ENSCAFG00000017369.4	.	5	3	2
30738153	G	PCTP	intronic	ENSCAFG00000017369.4	.	7	4	3
30738416	G	PCTP	intronic	ENSCAFG00000017369.4	.	21	15	6
30738513	C	PCTP	intronic	ENSCAFG00000017369.4	.	1	1	0
30738513	CT	PCTP	intronic	ENSCAFG00000017369.4	.	0	1	-1
30738648	G	PCTP	intronic	ENSCAFG00000017369.4	.	0	1	-1
30738693	C	PCTP	intronic	ENSCAFG00000017369.4	.	0	5	-5
30741006	A	PCTP	exonic	ENSCAFG00000017369.4	synonymous_SNV	24	15	9
30741441	A	PCTP	intronic	ENSCAFG00000017369.4	.	24	15	9
30741885	C	PCTP	intronic	ENSCAFG00000017369.4	.	23	13	10
30741886	A	PCTP	intronic	ENSCAFG00000017369.4	.	23	13	10
30741930	T	PCTP	intronic	ENSCAFG00000017369.4	.	23	12	11
30741973	C	PCTP	intronic	ENSCAFG00000017369.4	.	18	12	6
30741993	A	PCTP	intronic	ENSCAFG00000017369.4	.	0	1	-1
30741994	T	PCTP	intronic	ENSCAFG00000017369.4	.	9	11	-2
30741994	TGGGGGGG	PCTP	intronic	ENSCAFG00000017369.4	.	4	3	1
30741994	TGGGGGGG,TGGGGGGGGGG	PCTP	intronic	ENSCAFG00000017369.4	.	0	1	-1
30741994	TGGGGGGG,TGGGGGGGGGG,TGGGGGG	PCTP	intronic	ENSCAFG00000017369.4	.	0	1	-1
30741994	TGGGGGGG,TGGGGGGGGGG,TGGGGGGGGG	PCTP	intronic	ENSCAFG00000017369.4	.	0	1	-1
30742267	G	PCTP	intronic	ENSCAFG00000017369.4	.	24	15	9
30742544	CT	PCTP	intronic	ENSCAFG00000017369.4	.	0	1	-1
30743286	A	PCTP	intronic	ENSCAFG00000017369.4	.	24	15	9
30743294	G	PCTP	intronic	ENSCAFG00000017369.4	.	3	2	1
30743294	GGTCA,G	PCTP	intronic	ENSCAFG00000017369.4	.	17	13	4
30743294	GGTCAC,GC	PCTP	intronic	ENSCAFG00000017369.4	.	4	0	4
30743295	G	PCTP	intronic	ENSCAFG00000017369.4	.	4	1	3
30743295	T	PCTP	intronic	ENSCAFG00000017369.4	.	3	1	2
30743296	G	PCTP	intronic	ENSCAFG00000017369.4	.	24	14	10
30743300	G	PCTP	intronic	ENSCAFG00000017369.4	.	20	14	6
30743302	G	PCTP	intronic	ENSCAFG00000017369.4	.	24	15	9
30743576	C	PCTP	intronic	ENSCAFG00000017369.4	.	24	15	9
30744833	ATGT	PCTP	intronic	ENSCAFG00000017369.4	.	24	15	9
30745009	T	PCTP	intronic	ENSCAFG00000017369.4	.	0	10	-10
30745057	T	PCTP	intronic	ENSCAFG00000017369.4	.	2	22	-20
30745070	C	PCTP	intronic	ENSCAFG00000017369.4	.	2	22	-20
30745136	T	PCTP	intronic	ENSCAFG00000017369.4	.	2	24	-22
30745264	G	PCTP	intronic	ENSCAFG00000017369.4	.	2	24	-22
30745275	T	PCTP	intronic	ENSCAFG00000017369.4	.	2	24	-22
30745276	G	PCTP	intronic	ENSCAFG00000017369.4	.	2	24	-22
30745310	T	PCTP	intronic	ENSCAFG00000017369.4	.	1	7	-6
30745310	TGG	PCTP	intronic	ENSCAFG00000017369.4	.	1	17	-16
30745434	T	PCTP	intronic	ENSCAFG00000017369.4	.	1	19	-18
30745587	C	PCTP	intronic	ENSCAFG00000017369.4	.	14	12	2
30745601	A	PCTP	intronic	ENSCAFG00000017369.4	.	14	8	6
30745633	A	PCTP	intronic	ENSCAFG00000017369.4	.	18	10	8
30745676	A	PCTP	intronic	ENSCAFG00000017369.4	.	0	13	-13
30746894	G	PCTP	intronic	ENSCAFG00000017369.4	.	24	15	9
30747397	A	PCTP	intronic	ENSCAFG00000017369.4	.	24	15	9
30747855	C	PCTP	intronic	ENSCAFG00000017369.4	.	24	15	9
30747962	T	PCTP	intronic	ENSCAFG00000017369.4	.	24	15	9
30748156	G	PCTP	intronic	ENSCAFG00000017369.4	.	24	15	9
30748296	C	PCTP	intronic	ENSCAFG00000017369.4	.	24	15	9
30749102	G	PCTP	intronic	ENSCAFG00000017369.4	.	24	15	9
30749828	G	PCTP	intronic	ENSCAFG00000017369.4	.	24	15	9
30750633	T	PCTP	intronic	ENSCAFG00000017369.4	.	24	15	9
30750881	A	PCTP	intronic	ENSCAFG00000017369.4	.	24	15	9
30751096	T	PCTP	intronic	ENSCAFG00000017369.4	.	24	15	9
30751724	T	PCTP	intronic	ENSCAFG00000017369.4	.	24	15	9
30751837	A	PCTP	intronic	ENSCAFG00000017369.4	.	24	15	9
30751840	A	PCTP	intronic	ENSCAFG00000017369.4	.	24	15	9
30751845	A	PCTP	intronic	ENSCAFG00000017369.4	.	24	15	9
30752391	G	PCTP	intronic	ENSCAFG00000017369.4	.	11	6	5
30752595	G	PCTP	intronic	ENSCAFG00000017369.4	.	23	12	11
30752596	T	PCTP	intronic	ENSCAFG00000017369.4	.	22	13	9
30752596	T,G	PCTP	intronic	ENSCAFG00000017369.4	.	1	0	1
30753714	A	PCTP	intronic	ENSCAFG00000017369.4	.	0	14	-14
30753827	A	PCTP	intronic	ENSCAFG00000017369.4	.	24	2	22
30754136	T	PCTP	intronic	ENSCAFG00000017369.4	.	0	1	-1
30754587	C	PCTP	intronic	ENSCAFG00000017369.4	.	20	13	7
30754587	C,G	PCTP	intronic	ENSCAFG00000017369.4	.	1	0	1
30754629	T	PCTP	intronic	ENSCAFG00000017369.4	.	0	4	-4
30754775	T	PCTP	intronic	ENSCAFG00000017369.4	.	24	2	22
30754817	T	PCTP	intronic	ENSCAFG00000017369.4	.	0	9	-9
30754917	A	PCTP	intronic	ENSCAFG00000017369.4	.	0	1	-1
30755000	T	PCTP	intronic	ENSCAFG00000017369.4	.	24	2	22
30755193	G	PCTP	intronic	ENSCAFG00000017369.4	.	0	14	-14
30755345	A	PCTP	intronic	ENSCAFG00000017369.4	.	15	1	14
30755345	A,C	PCTP	intronic	ENSCAFG00000017369.4	.	1	0	1
30755393	CCTCTCTCTCTCTCT	PCTP	intronic	ENSCAFG00000017369.4	.	0	1	-1
30755393	CCTCTCTCTCTCTCTCT	PCTP	intronic	ENSCAFG00000017369.4	.	0	1	-1
30755393	CCTCTCTCTCTCTCTCTCTCTCTCTCT,CCTCTCTCTCTCTCTCTCTCTCTCT,CCTCTCTCCCTCTCTCTCTCTCTCTCTCT		.	.	.	1	0	1
30755393	CCTCTCTCTCTCTCTCTCTCTCTCTCTCT	PCTP	intronic	ENSCAFG00000017369.4	.	0	1	-1
30755393	CCTCTCTCTCTCTCTCTCTCTCTCTCTCT,CCTCTCTCTCTCTCTCTCTCTCTCT,CCTCTTTCTCTCTCTCTCTCTCTCTCT		.	.	.	1	0	1
30755393	CCTCTCTCTCTCTCTCTCTCTCTCTCTCT,CCTCTCTCTCTCTCTCTCTCTCTCTCT	PCTP	intronic	ENSCAFG00000017369.4	.	1	0	1
30755395	TCTCTCTCCCTCTCTC	PCTP	intronic	ENSCAFG00000017369.4	.	1	0	1
30755396	CTCCCTCTCTTTC	PCTP	intronic	ENSCAFG00000017369.4	.	1	0	1
30755397	TCTCTCTCTCCCTCTCTCTC	PCTP	intronic	ENSCAFG00000017369.4	.	1	0	1
30755401	TCTCCCTCTCCCTC	PCTP	intronic	ENSCAFG00000017369.4	.	1	0	1
30755401	TCTCTCTCTCCCTCTCTCTC	PCTP	intronic	ENSCAFG00000017369.4	.	1	0	1
30755401	TCTCTCTCTCCCTCTCTCTC,TCCCTCCCTCTCTCTC		.	.	.	1	0	1
30755403	TCTCTCTCCCTCTCTC	PCTP	intronic	ENSCAFG00000017369.4	.	2	0	2
30755405	TCTCTCTCTCCCTCTCT	PCTP	intronic	ENSCAFG00000017369.4	.	1	0	1
30755407	TCTCTCTCTCCCTCT	PCTP	intronic	ENSCAFG00000017369.4	.	2	0	2
30755411	TCTCTCTCC	PCTP	intronic	ENSCAFG00000017369.4	.	1	0	1
30755890	A	PCTP	intronic	ENSCAFG00000017369.4	.	0	12	-12
30755965	T	PCTP	intronic	ENSCAFG00000017369.4	.	17	14	3
30755994	A	PCTP	intronic	ENSCAFG00000017369.4	.	15	1	14
30755994	A,G	PCTP	intronic	ENSCAFG00000017369.4	.	1	0	1
30756020	CAGAGAGAGAGAGAGAGAGAGAG	PCTP	intronic	ENSCAFG00000017369.4	.	0	1	-1
30756020	CAGAGAGAGAGAGAGAGAGAGAGAGAGAGAG,CAGAGAGAGAGAGAGAGAGAGAGAGAGAGAGAGAG	PCTP	intronic	ENSCAFG00000017369.4	.	0	1	-1
30756020	CAGAGAGAGAGAGAGAGAGAGAGAGAGAGAGAG,CAGAGAGAGAGAGAGAGAGAGAGAGAGAGAG,CAGAGAGAGAGAGAGAGAGAGAGAGAGAGAGAGAGAG	PCTP	intronic	ENSCAFG00000017369.4	.	1	0	1
30756020	CAGAGAGAGAGAGAGAGAGAGAGAGAGAGAGAG,CAGCGAGAGAGAGAGAGAGAGAGAGAGAGAGAGAG,CAGAGAGAGAGAGAGAGAGAGAGAGAGAG	PCTP	intronic	ENSCAFG00000017369.4	.	1	0	1
30756020	CAGAGAGAGAGAGAGAGAGAGAGAGAGAGAGAGAG	PCTP	intronic	ENSCAFG00000017369.4	.	1	0	1
30756020	CAGAGAGAGAGAGAGAGAGAGAGAGAGAGAGAGAG,CAGAGAGAGAGAGAGAGAGAGAGAGAGAGAG,CAGAAAGAGAGAGAGAGAGAGAGAGAGAGAGAG		.	.	.	1	0	1
30756020	CAGAGAGAGAGAGAGAGAGAGAGAGAGAGAGAGAG,CAGAGAGAGAGAGAGAGAGAGAGAGAGAGAG,CAGAGAGAGAGAGAGAGAGAGAGAGAGAGAGAG	PCTP	intronic	ENSCAFG00000017369.4	.	1	0	1
30756031	AGAGAGAGAGGGAGAGAGAG	PCTP	intronic	ENSCAFG00000017369.4	.	1	0	1
30756031	AGAGAGAGAGTGAGAGAGAG	PCTP	intronic	ENSCAFG00000017369.4	.	1	0	1
30756033	AGAGAGAGAGGGAGAGAGAG	PCTP	intronic	ENSCAFG00000017369.4	.	1	0	1
30756041	AGAGAGAGAGGGAG	PCTP	intronic	ENSCAFG00000017369.4	.	1	0	1
30756043	AGAGAGAGAGCG	PCTP	intronic	ENSCAFG00000017369.4	.	1	0	1
30756044	GAGAGAGAGAT	PCTP	intronic	ENSCAFG00000017369.4	.	1	0	1
30756089	G	PCTP	intronic	ENSCAFG00000017369.4	.	0	10	-10
30756100	G	PCTP	intronic	ENSCAFG00000017369.4	.	0	11	-11
30756308	A	PCTP	intronic	ENSCAFG00000017369.4	.	24	2	22
30756413	T	PCTP	intronic	ENSCAFG00000017369.4	.	23	2	21
30756413	T,G	PCTP	intronic	ENSCAFG00000017369.4	.	1	0	1
30756530	C	PCTP	intronic	ENSCAFG00000017369.4	.	24	2	22
30756548	GCAAAACAA	PCTP	intronic	ENSCAFG00000017369.4	.	24	2	22
30756946	T	PCTP	intronic	ENSCAFG00000017369.4	.	0	14	-14
30757110	C	PCTP	intronic	ENSCAFG00000017369.4	.	23	2	21
30757110	C,A	PCTP	intronic	ENSCAFG00000017369.4	.	1	0	1
30757256	G	PCTP	intronic	ENSCAFG00000017369.4	.	21	15	6
30757256	G,T	PCTP	intronic	ENSCAFG00000017369.4	.	1	0	1
30757261	A	PCTP	intronic	ENSCAFG00000017369.4	.	0	14	-14
30757287	C	PCTP	intronic	ENSCAFG00000017369.4	.	19	15	4
30757287	C,A	PCTP	intronic	ENSCAFG00000017369.4	.	2	0	2
30757583	CCTG	PCTP	intronic	ENSCAFG00000017369.4	.	1	0	1
30757583	CCTGC	PCTP	intronic	ENSCAFG00000017369.4	.	23	15	8
30757584	CTGA	PCTP	intronic	ENSCAFG00000017369.4	.	1	0	1
30757632	T	PCTP	intronic	ENSCAFG00000017369.4	.	24	2	22
30757753	A	PCTP	intronic	ENSCAFG00000017369.4	.	24	2	22
30757965	G	PCTP	intronic	ENSCAFG00000017369.4	.	16	2	14
30758039	C	PCTP	intronic	ENSCAFG00000017369.4	.	15	10	5
30758097	C	PCTP	intronic	ENSCAFG00000017369.4	.	0	1	-1
30758097	CCTCTCTCTCTCTCTCT	PCTP	intronic	ENSCAFG00000017369.4	.	0	1	-1
30758097	CCTCTCTCTCTCTCTCTCT	PCTP	intronic	ENSCAFG00000017369.4	.	1	3	-2
30758114	CT	PCTP	intronic	ENSCAFG00000017369.4	.	2	0	2
30758116	CTGTGTGT	PCTP	intronic	ENSCAFG00000017369.4	.	1	0	1
30758118	C	PCTP	intronic	ENSCAFG00000017369.4	.	6	7	-1
30758258	ACTCCCT	PCTP	intronic	ENSCAFG00000017369.4	.	2	1	1
30758279	A	PCTP	intronic	ENSCAFG00000017369.4	.	0	1	-1
30758282	G	PCTP	intronic	ENSCAFG00000017369.4	.	0	1	-1
30758293	T	PCTP	intronic	ENSCAFG00000017369.4	.	0	1	-1
30758334	GTT	PCTP	intronic	ENSCAFG00000017369.4	.	0	1	-1
30758447	C	PCTP	intronic	ENSCAFG00000017369.4	.	1	1	0
30758520	T	PCTP	intronic	ENSCAFG00000017369.4	.	11	14	-3
30758521	A	PCTP	intronic	ENSCAFG00000017369.4	.	13	14	-1
30758621	A	PCTP	intronic	ENSCAFG00000017369.4	.	24	2	22
30758686	G	PCTP	intronic	ENSCAFG00000017369.4	.	0	14	-14
30758689	C	PCTP	intronic	ENSCAFG00000017369.4	.	24	2	22
30758701	A	PCTP	intronic	ENSCAFG00000017369.4	.	0	14	-14
30758702	A	PCTP	intronic	ENSCAFG00000017369.4	.	24	2	22
30759055	C	PCTP	intronic	ENSCAFG00000017369.4	.	24	15	9
30759066	T	PCTP	intronic	ENSCAFG00000017369.4	.	23	14	9
30759066	TC	PCTP	intronic	ENSCAFG00000017369.4	.	1	0	1
30759162	C	PCTP	intronic	ENSCAFG00000017369.4	.	0	13	-13
30759178	TAAAAA	PCTP	intronic	ENSCAFG00000017369.4	.	0	1	-1
30759184	AAAA	PCTP	intronic	ENSCAFG00000017369.4	.	24	12	12
30759187	A	PCTP	intronic	ENSCAFG00000017369.4	.	23	12	11
30759189	A	PCTP	intronic	ENSCAFG00000017369.4	.	23	11	12
30759192	A	PCTP	intronic	ENSCAFG00000017369.4	.	24	14	10
30759271	A	PCTP	intronic	ENSCAFG00000017369.4	.	0	14	-14
30759295	C	PCTP	intronic	ENSCAFG00000017369.4	.	24	15	9
30759348	A	PCTP	intronic	ENSCAFG00000017369.4	.	24	2	22
30759419	A	PCTP	intronic	ENSCAFG00000017369.4	.	24	15	9
30759451	A	PCTP	intronic	ENSCAFG00000017369.4	.	24	15	9
30759519	AT	PCTP	intronic	ENSCAFG00000017369.4	.	0	14	-14
30759656	C	PCTP	intronic	ENSCAFG00000017369.4	.	24	15	9
30759811	A	PCTP	intronic	ENSCAFG00000017369.4	.	24	2	22
30759943	G	PCTP	intronic	ENSCAFG00000017369.4	.	0	14	-14
30760160	G	PCTP	intronic	ENSCAFG00000017369.4	.	1	0	1
30760160	GTGCC	PCTP	intronic	ENSCAFG00000017369.4	.	23	2	21
30760162	G	PCTP	intronic	ENSCAFG00000017369.4	.	0	1	-1
30760162	GC	PCTP	intronic	ENSCAFG00000017369.4	.	0	13	-13
30760165	T	PCTP	intronic	ENSCAFG00000017369.4	.	1	0	1
30760343	T	PCTP	intronic	ENSCAFG00000017369.4	.	0	14	-14
30760876	T	PCTP	intronic	ENSCAFG00000017369.4	.	0	14	-14
30761076	T	PCTP	intronic	ENSCAFG00000017369.4	.	0	14	-14
30761098	T	PCTP	intronic	ENSCAFG00000017369.4	.	24	2	22
30761142	C	PCTP	intronic	ENSCAFG00000017369.4	.	23	2	21
30761142	C,T	PCTP	intronic	ENSCAFG00000017369.4	.	1	0	1
30761218	G	PCTP	intronic	ENSCAFG00000017369.4	.	0	14	-14
30761595	A	PCTP	intronic	ENSCAFG00000017369.4	.	0	14	-14
30765142	A	PCTP	intronic	ENSCAFG00000017369.4	.	0	1	-1
30765563	G,C	PCTP	intronic	ENSCAFG00000017369.4	.	0	1	-1
30767242	A	PCTP	intronic	ENSCAFG00000017369.4	.	2	15	-13
30767242	A,T	PCTP	intronic	ENSCAFG00000017369.4	.	0	2	-2
30767243	AC	PCTP	intronic	ENSCAFG00000017369.4	.	0	8	-8
30767243	ACCCCCCCCC	PCTP	intronic	ENSCAFG00000017369.4	.	0	2	-2
30767771	A	PCTP	intronic	ENSCAFG00000017369.4	.	1	1	0
30767772	GGAGAGAGAGAGAGAGAGAGAGAGAGAGAGAGA,GGAGAGAGAGAGAGAGAGAGAGAGAGAGAGAGAGA,GGAGAGAGAGAGAGAGAGAGAGAGAGAGAGA	PCTP	intronic	ENSCAFG00000017369.4	.	0	1	-1
30767772	GGAGAGAGAGAGAGAGAGAGAGAGAGAGAGAGAGA	PCTP	intronic	ENSCAFG00000017369.4	.	0	2	-2
30767772	GGAGAGAGAGAGAGAGAGAGAGAGAGAGAGAGAGA,GGAGAGAGAGAGAGAGAGAGAGAGAGAGA	PCTP	intronic	ENSCAFG00000017369.4	.	0	1	-1
30767772	GGAGAGAGAGAGAGAGAGAGAGAGAGAGAGAGAGA,GGAGAGAGAGAGAGAGAGAGAGAGAGAGA,GGAGAGAGAGAGAGAGAGAGAGAGAGAGAGAGA	PCTP	intronic	ENSCAFG00000017369.4	.	0	1	-1
30767772	GGAGAGAGAGAGAGAGAGAGAGAGAGAGAGAGAGA,GGAGAGAGAGAGAGAGAGAGAGAGAGAGAGA,GGAGAGAGAGAGAGAGAGAGAGAGAGAGAGAGA	PCTP	intronic	ENSCAFG00000017369.4	.	0	1	-1
30767772	GGAGAGAGAGAGAGAGAGAGAGAGAGAGAGAGAGA,GGAGAGAGAGAGAGAGAGAGAGAGAGAGAGAGA	PCTP	intronic	ENSCAFG00000017369.4	.	1	3	-2
30767772	GGAGAGAGAGAGAGAGAGAGAGAGAGAGAGAGAGA,GGAGAGAGAGAGAGAGAGAGAGAGAGAGAGAGA,GGAGAGAGAGAGAGAGAGAGAGAGAGA	PCTP	intronic	ENSCAFG00000017369.4	.	0	1	-1
30767772	GGAGAGAGAGAGAGAGAGAGAGAGAGAGAGAGAGA,GGAGAGAGAGAGAGAGAGAGAGAGAGAGAGAGA,GGAGAGAGAGAGAGAGAGAGAGAGAGAGA	PCTP	intronic	ENSCAFG00000017369.4	.	0	1	-1
30767772	GGAGAGAGAGAGAGAGAGAGAGAGAGAGAGAGAGA,GGAGAGAGAGAGAGAGAGAGAGAGAGAGAGAGA,GGAGAGAGAGAGAGAGAGAGAGAGAGAGAGA	PCTP	intronic	ENSCAFG00000017369.4	.	0	1	-1
30767772	GGAGAGAGAGAGAGAGAGAGAGAGAGAGAGAGAGA,GGAGAGAGAGAGAGAGAGAGAGAGAGAGAGAGA,GGAGAGAGAGAGAGAGAGAGAGAGAGAGAGAGAGAGA	PCTP	intronic	ENSCAFG00000017369.4	.	0	1	-1
30767772	GGAGAGAGAGAGAGAGAGAGAGAGAGAGAGAGAGA,GGAGAGAGAGAGAGAGAGAGAGAGAGAGAGAGAGAGA	PCTP	intronic	ENSCAFG00000017369.4	.	0	1	-1
30767772	GGAGAGAGAGAGAGAGAGAGAGAGAGAGAGAGAGAGA,GGAGAGAGAGAGAGAGAGAGAGAGAGAGAGAGAGA,GGAGAGAGAGAGAGAGAGAGAGAGAGAGAGAGA	PCTP	intronic	ENSCAFG00000017369.4	.	1	0	1
30767772	GGAGAGAGAGAGAGAGAGAGAGAGAGAGAGAGAGAGA,GGAGAGAGAGAGAGAGAGAGAGAGAGAGAGAGAGAGAGAGA,GGAGAGAGAGAGAGAGAGAGAGAGAGAGAGAGAGAGAGA	PCTP	intronic	ENSCAFG00000017369.4	.	1	0	1
30767772	GGAGAGAGAGAGAGAGAGAGAGAGAGAGAGAGAGAGA,GGAGAGAGAGAGAGAGAGAGAGAGAGAGAGAGAGAGAGAGA,GGAGAGAGAGAGAGAGAGAGAGAGAGAGAGAGAGAGAGAGAGA	PCTP	intronic	ENSCAFG00000017369.4	.	1	0	1
30767772	GGAGAGAGAGAGAGAGAGAGAGAGAGAGAGAGAGAGAGA,GGAGAGAGAGAGAGAGAGAGAGAGAGAGAGAGA,GGAGAGAGAGAGAGAGAGAGAGAGAGAGAGAGAGA	PCTP	intronic	ENSCAFG00000017369.4	.	0	1	-1
30767772	GGAGAGAGAGAGAGAGAGAGAGAGAGAGAGAGAGAGAGA,GGAGAGAGAGAGAGAGAGAGAGAGAGAGAGAGAGAGAGAGA,GGAGAGAGAGAGAGAGAGAGAGAGAGAGAGAGAGA	PCTP	intronic	ENSCAFG00000017369.4	.	1	0	1
30767772	GGAGAGAGAGAGAGAGAGAGAGAGAGAGAGAGAGAGAGA,GGAGAGAGAGAGAGAGAGAGAGAGAGAGAGAGAGAGAGAGA,GGAGAGAGAGAGAGAGAGAGAGAGAGAGAGAGAGAGA	PCTP	intronic	ENSCAFG00000017369.4	.	1	0	1
30767772	GGAGAGAGAGAGAGAGAGAGAGAGAGAGAGAGAGAGAGAGA,GGAGAGAGAGAGAGAGAGAGAGAGAGAGAGAGAGAGA,GGAGAGAGAGAGAGAGAGAGAGAGAGAGAGAGA	PCTP	intronic	ENSCAFG00000017369.4	.	1	0	1
30767774	A	PCTP	intronic	ENSCAFG00000017369.4	.	0	1	-1
30767775	A	PCTP	intronic	ENSCAFG00000017369.4	.	0	2	-2
30767776	A	PCTP	intronic	ENSCAFG00000017369.4	.	0	1	-1
30767779	A	PCTP	intronic	ENSCAFG00000017369.4	.	2	0	2
30767781	A	PCTP	intronic	ENSCAFG00000017369.4	.	2	0	2
30767785	A	PCTP	intronic	ENSCAFG00000017369.4	.	1	7	-6
30767787	A	PCTP	intronic	ENSCAFG00000017369.4	.	0	2	-2
30768121	T	PCTP	intronic	ENSCAFG00000017369.4	.	1	15	-14
30768171	T	PCTP	intronic	ENSCAFG00000017369.4	.	1	17	-16
30768458	C	PCTP	intronic	ENSCAFG00000017369.4	.	15	24	-9
30768782	C	PCTP	intronic	ENSCAFG00000017369.4	.	3	19	-16
30769299	T	PCTP	intronic	ENSCAFG00000017369.4	.	10	1	9
30770205	C	PCTP	intronic	ENSCAFG00000017369.4	.	1	2	-1
30771329	A	PCTP	intronic	ENSCAFG00000017369.4	.	1	0	1
30772363	T	PCTP	intronic	ENSCAFG00000017369.4	.	5	1	4
30772555	G	PCTP	intronic	ENSCAFG00000017369.4	.	3	24	-21
30773152	C	PCTP	intronic	ENSCAFG00000017369.4	.	24	2	22
30773889	C	PCTP	intronic	ENSCAFG00000017369.4	.	24	24	0
30774020	C	PCTP	intronic	ENSCAFG00000017369.4	.	0	3	-3
30774020	CTTTT	PCTP	intronic	ENSCAFG00000017369.4	.	0	11	-11
30774038	GTTGT	PCTP	intronic	ENSCAFG00000017369.4	.	10	0	10
30774038	GTTGTTTGTTTGTTTGTTTGTTT	PCTP	intronic	ENSCAFG00000017369.4	.	14	2	12
30774039	TTGTCTGT	PCTP	intronic	ENSCAFG00000017369.4	.	1	0	1
30774040	TGTTAGTT	PCTP	intronic	ENSCAFG00000017369.4	.	1	0	1
30774043	TTGTGTGT	PCTP	intronic	ENSCAFG00000017369.4	.	1	0	1
30774046	TTTGGTTG	PCTP	intronic	ENSCAFG00000017369.4	.	1	0	1
30774047	TTGTGTGT	PCTP	intronic	ENSCAFG00000017369.4	.	1	0	1
30774048	TGTTCGTT	PCTP	intronic	ENSCAFG00000017369.4	.	1	0	1
30774050	TTTGGTTG	PCTP	intronic	ENSCAFG00000017369.4	.	1	0	1
30774051	TTGTCTGT	PCTP	intronic	ENSCAFG00000017369.4	.	1	0	1
30774052	TGTTGGTT	PCTP	intronic	ENSCAFG00000017369.4	.	1	0	1
30774054	TTTGTT	PCTP	intronic	ENSCAFG00000017369.4	.	1	0	1
30774392	G	PCTP	intronic	ENSCAFG00000017369.4	.	24	2	22
30774397	T	PCTP	intronic	ENSCAFG00000017369.4	.	24	2	22
30774536	A	PCTP	intronic	ENSCAFG00000017369.4	.	24	2	22
30774631	C	PCTP	intronic	ENSCAFG00000017369.4	.	24	2	22
30774983	A	PCTP	intronic	ENSCAFG00000017369.4	.	3	24	-21
30775979	G	PCTP	intronic	ENSCAFG00000017369.4	.	24	2	22
30775981	G	PCTP	intronic	ENSCAFG00000017369.4	.	24	2	22
30777434	T	PCTP	intronic	ENSCAFG00000017369.4	.	24	24	0
30778603	C	PCTP	intronic	ENSCAFG00000017369.4	.	2	2	0
30778665	G	PCTP	intronic	ENSCAFG00000017369.4	.	1	0	1
30778684	G	PCTP	intronic	ENSCAFG00000017369.4	.	1	0	1
30779212	C	PCTP	intronic	ENSCAFG00000017369.4	.	6	10	-4
30779547	A	PCTP	intronic	ENSCAFG00000017369.4	.	24	23	1
30779547	AGGGGG	PCTP	intronic	ENSCAFG00000017369.4	.	0	1	-1
30780185	A	PCTP	intronic	ENSCAFG00000017369.4	.	24	24	0
30780642	TC	PCTP	intronic	ENSCAFG00000017369.4	.	1	2	-1
30780642	TCC	PCTP	intronic	ENSCAFG00000017369.4	.	5	2	3
30780642	TCCCCCCCCCC,TCCCCCCCCCCC,TCCCCCCCCCCCC	PCTP	intronic	ENSCAFG00000017369.4	.	0	1	-1
30780642	TCCCCCCCCCCC,TCCCCCCCCCC,TCCCCCCCCCCCC	PCTP	intronic	ENSCAFG00000017369.4	.	1	0	1
30780642	TCCCCCCCCCCC,TCCCCCCCCCCCC	PCTP	intronic	ENSCAFG00000017369.4	.	1	2	-1
30780642	TCCCCCCCCCCC,TCCCCCCCCCCCC,TCCCCCCCCCC	PCTP	intronic	ENSCAFG00000017369.4	.	1	0	1
30780642	TCCCCCCCCCCC,TGCCCCCTCCCCCCCCCC,TCCCCCCCCCC	PCTP	intronic	ENSCAFG00000017369.4	.	1	0	1
30780642	TCCCCCCCCCCCC,TCCCCCCCCCCC	PCTP	intronic	ENSCAFG00000017369.4	.	0	2	-2
30780651	CCCA	PCTP	intronic	ENSCAFG00000017369.4	.	1	0	1
30780659	T	PCTP	intronic	ENSCAFG00000017369.4	.	23	22	1
30780659	T,A	PCTP	intronic	ENSCAFG00000017369.4	.	0	1	-1
30780659	T,G	PCTP	intronic	ENSCAFG00000017369.4	.	1	0	1
30780771	A	PCTP	intronic	ENSCAFG00000017369.4	.	23	24	-1
30780771	A,G	PCTP	intronic	ENSCAFG00000017369.4	.	1	0	1
30780985	T	PCTP	intronic	ENSCAFG00000017369.4	.	24	24	0
30781102	GCCCCCCC	PCTP	intronic	ENSCAFG00000017369.4	.	23	19	4
30781102	GCCCCCCC,GCCCCCCCC	PCTP	intronic	ENSCAFG00000017369.4	.	1	5	-4
30781210	C	PCTP	intronic	ENSCAFG00000017369.4	.	24	24	0
30781353	A	PCTP	intronic	ENSCAFG00000017369.4	.	24	24	0
30781362	TCC	PCTP	intronic	ENSCAFG00000017369.4	.	24	24	0
30781416	T	PCTP	intronic	ENSCAFG00000017369.4	.	24	24	0
30781537	T	PCTP	intronic	ENSCAFG00000017369.4	.	24	24	0
30781901	C	PCTP	intronic	ENSCAFG00000017369.4	.	24	24	0
30782204	C	PCTP	intronic	ENSCAFG00000017369.4	.	23	24	-1
30782204	C,T	PCTP	intronic	ENSCAFG00000017369.4	.	1	0	1
30782235	CT	PCTP	intronic	ENSCAFG00000017369.4	.	11	3	8
30782739	G	PCTP	intronic	ENSCAFG00000017369.4	.	2	1	1
30782739	G,GA	PCTP	intronic	ENSCAFG00000017369.4	.	0	1	-1
30782740	T	PCTP	intronic	ENSCAFG00000017369.4	.	10	14	-4
30782740	T,TA	PCTP	intronic	ENSCAFG00000017369.4	.	1	1	0
30782740	TAAAAAAAAAAAA	PCTP	intronic	ENSCAFG00000017369.4	.	1	0	1
30782740	TAAAAAAAAAAAA,TAAAAAAAAAA,TAAAAAAAAAAA	PCTP	intronic	ENSCAFG00000017369.4	.	1	0	1
30782740	TAAAAAAAAAAAA,TAAAAAAAAAAA	PCTP	intronic	ENSCAFG00000017369.4	.	6	6	0
30782740	TAAAAAAAAAAAA,TAAAAAAAAAAA,TAAAAAAAAAA	PCTP	intronic	ENSCAFG00000017369.4	.	2	1	1
30782740	TAAAAAAAAAAAA,TAAAAAAAAAAA,TAAAAAAAAAAAAA	PCTP	intronic	ENSCAFG00000017369.4	.	1	1	0
30782740	TAAAAAAAAAAAA,TAAAAAAAAAAA,TAAAAAAAAAAAAAAAA	PCTP	intronic	ENSCAFG00000017369.4	.	1	0	1
30782740	TAAAAAAAAAAAA,TAAAAAAAAAAAAA	PCTP	intronic	ENSCAFG00000017369.4	.	1	0	1
30783727	GT	PCTP	intronic	ENSCAFG00000017369.4	.	24	24	0
30783824	T	PCTP	intronic	ENSCAFG00000017369.4	.	24	24	0
30783968	ATTTTTTT	PCTP	intronic	ENSCAFG00000017369.4	.	24	24	0
30784234	C	PCTP	intronic	ENSCAFG00000017369.4	.	17	15	2
30784235	C	PCTP	intronic	ENSCAFG00000017369.4	.	16	13	3
30784235	C,A	PCTP	intronic	ENSCAFG00000017369.4	.	0	1	-1
30784258	C	PCTP	intronic	ENSCAFG00000017369.4	.	9	12	-3
30784687	G	PCTP	intronic	ENSCAFG00000017369.4	.	19	23	-4
30784687	G,C	PCTP	intronic	ENSCAFG00000017369.4	.	1	0	1
30784760	C	PCTP	intronic	ENSCAFG00000017369.4	.	24	22	2
30784760	C,A	PCTP	intronic	ENSCAFG00000017369.4	.	0	2	-2
30785228	G	PCTP	intronic	ENSCAFG00000017369.4	.	24	24	0
30786041	A	PCTP	intronic	ENSCAFG00000017369.4	.	1	0	1
30786628	G	PCTP	intronic	ENSCAFG00000017369.4	.	12	18	-6
30786662	G	PCTP	intronic	ENSCAFG00000017369.4	.	13	17	-4
30786759	A	PCTP	intronic	ENSCAFG00000017369.4	.	15	22	-7
30786779	C	PCTP	intronic	ENSCAFG00000017369.4	.	16	20	-4
30786818	T	PCTP	intronic	ENSCAFG00000017369.4	.	20	22	-2
30787212	G	PCTP	intronic	ENSCAFG00000017369.4	.	13	19	-6
30787212	G,T	PCTP	intronic	ENSCAFG00000017369.4	.	2	0	2
30787254	TTT	PCTP	intronic	ENSCAFG00000017369.4	.	4	1	3
30787255	TT	PCTP	intronic	ENSCAFG00000017369.4	.	3	5	-2
30787256	T	PCTP	intronic	ENSCAFG00000017369.4	.	0	1	-1
30787257	T	PCTP	intronic	ENSCAFG00000017369.4	.	3	5	-2
30787264	T	PCTP	intronic	ENSCAFG00000017369.4	.	18	19	-1
30787272	A	PCTP	intronic	ENSCAFG00000017369.4	.	17	18	-1
30787272	TTTTA	PCTP	intronic	ENSCAFG00000017369.4	.	1	0	1
30787467	G	PCTP	intronic	ENSCAFG00000017369.4	.	24	23	1
30787707	A	PCTP	intronic	ENSCAFG00000017369.4	.	24	24	0
30787849	C	PCTP	intronic	ENSCAFG00000017369.4	.	24	24	0
30787900	AGT	PCTP	intronic	ENSCAFG00000017369.4	.	1	2	-1
30787903	G	PCTP	intronic	ENSCAFG00000017369.4	.	1	2	-1
30787903	GT	PCTP	intronic	ENSCAFG00000017369.4	.	23	22	1
30788044	CAAAA	PCTP	intronic	ENSCAFG00000017369.4	.	1	0	1
30788047	A	PCTP	intronic	ENSCAFG00000017369.4	.	2	1	1
30788048	A	PCTP	intronic	ENSCAFG00000017369.4	.	24	23	1
30788111	TATCA	PCTP	intronic	ENSCAFG00000017369.4	.	1	0	1
30788111	TATCAAT	PCTP	intronic	ENSCAFG00000017369.4	.	23	23	0
30788112	ATCATT	PCTP	intronic	ENSCAFG00000017369.4	.	1	0	1
30788214	G	PCTP	intronic	ENSCAFG00000017369.4	.	17	22	-5
30788214	G,A	PCTP	intronic	ENSCAFG00000017369.4	.	1	0	1
30788214	G,T	PCTP	intronic	ENSCAFG00000017369.4	.	3	1	2
30788232	TGG	PCTP	intronic	ENSCAFG00000017369.4	.	21	23	-2
30788232	TGG,TGGG	PCTP	intronic	ENSCAFG00000017369.4	.	1	0	1
30788692	CATGA	PCTP	intronic	ENSCAFG00000017369.4	.	5	9	-4
30788770	C	PCTP	intronic	ENSCAFG00000017369.4	.	7	11	-4
30788981	G	PCTP	intronic	ENSCAFG00000017369.4	.	21	23	-2
30788981	G,T	PCTP	intronic	ENSCAFG00000017369.4	.	1	0	1
30791599	A	PCTP	intronic	ENSCAFG00000017369.4	.	24	24	0
30791635	TA	PCTP	intronic	ENSCAFG00000017369.4	.	24	24	0
30791637	A	PCTP	intronic	ENSCAFG00000017369.4	.	24	24	0
30791641	G	PCTP	intronic	ENSCAFG00000017369.4	.	24	24	0
30791747	A	PCTP	intronic	ENSCAFG00000017369.4	.	23	24	-1
30791826	G	PCTP	intronic	ENSCAFG00000017369.4	.	13	15	-2
30791837	A	PCTP	intronic	ENSCAFG00000017369.4	.	9	14	-5
30792076	TG	PCTP	intronic	ENSCAFG00000017369.4	.	1	1	0
30792117	G	PCTP	intronic	ENSCAFG00000017369.4	.	1	1	0
30792157	G	PCTP	intronic	ENSCAFG00000017369.4	.	3	8	-5
30792200	A	PCTP	intronic	ENSCAFG00000017369.4	.	5	12	-7
30792200	ATTT	PCTP	intronic	ENSCAFG00000017369.4	.	7	7	0
30792292	A	PCTP	intronic	ENSCAFG00000017369.4	.	17	23	-6
30792299	G	PCTP	intronic	ENSCAFG00000017369.4	.	18	23	-5
30792523	C	PCTP	intronic	ENSCAFG00000017369.4	.	23	24	-1
30792568	A	PCTP	intronic	ENSCAFG00000017369.4	.	23	23	0
30792621	C	PCTP	intronic	ENSCAFG00000017369.4	.	22	23	-1
30792677	G	PCTP	intronic	ENSCAFG00000017369.4	.	20	23	-3
30792677	G,T	PCTP	intronic	ENSCAFG00000017369.4	.	1	0	1
30792781	T	PCTP	intronic	ENSCAFG00000017369.4	.	15	14	1
30792817	C	PCTP	intronic	ENSCAFG00000017369.4	.	1	0	1
30792818	A	PCTP	intronic	ENSCAFG00000017369.4	.	2	2	0
30792819	T	PCTP	intronic	ENSCAFG00000017369.4	.	2	2	0
30792819	TGAGAGAGAGAGAGAGAGAGAG	PCTP	intronic	ENSCAFG00000017369.4	.	6	6	0
30792819	TGAGAGAGAGAGAGAGAGAGAG,TGAGAGAGAGAGAGAGAGAG	PCTP	intronic	ENSCAFG00000017369.4	.	3	1	2
30792819	TGAGAGAGAGAGAGAGAGAGAG,TGAGAGAGAGAGAGAGAGAG,TGAGAGAGAGAGAGAGAGAGAGAG	PCTP	intronic	ENSCAFG00000017369.4	.	0	1	-1
30792841	A	PCTP	intronic	ENSCAFG00000017369.4	.	2	2	0
30792885	A	PCTP	intronic	ENSCAFG00000017369.4	.	19	18	1
30792999	CATA	PCTP	intronic	ENSCAFG00000017369.4	.	23	22	1
30792999	CATAA		.	.	.	0	1	-1
30793091	G	PCTP	intronic	ENSCAFG00000017369.4	.	24	24	0
30793130	T	PCTP	intronic	ENSCAFG00000017369.4	.	24	24	0
30793134	T	PCTP	intronic	ENSCAFG00000017369.4	.	23	24	-1
30793134	T,C	PCTP	intronic	ENSCAFG00000017369.4	.	1	0	1
30793707	C	PCTP	intronic	ENSCAFG00000017369.4	.	2	24	-22
30793877	T	PCTP	intronic	ENSCAFG00000017369.4	.	2	23	-21
30793974	G	PCTP	intronic	ENSCAFG00000017369.4	.	2	23	-21
30794008	T	PCTP	intronic	ENSCAFG00000017369.4	.	2	24	-22
30794009	C	PCTP	intronic	ENSCAFG00000017369.4	.	2	24	-22
30794301	T	PCTP	intronic	ENSCAFG00000017369.4	.	2	24	-22
30794345	C	PCTP	intronic	ENSCAFG00000017369.4	.	2	24	-22
30794346	A	PCTP	intronic	ENSCAFG00000017369.4	.	2	24	-22
30794387	C	PCTP	intronic	ENSCAFG00000017369.4	.	2	24	-22
30794622	A	PCTP	intronic	ENSCAFG00000017369.4	.	2	22	-20
30794622	A,C	PCTP	intronic	ENSCAFG00000017369.4	.	0	1	-1
30794681	T	PCTP	intronic	ENSCAFG00000017369.4	.	2	20	-18
30794681	T,G	PCTP	intronic	ENSCAFG00000017369.4	.	0	1	-1
30794763	G	PCTP	intronic	ENSCAFG00000017369.4	.	2	9	-7
30794783	AGG	PCTP	intronic	ENSCAFG00000017369.4	.	2	5	-3
30795081	T	PCTP	intronic	ENSCAFG00000017369.4	.	2	19	-17
30795081	T,G	PCTP	intronic	ENSCAFG00000017369.4	.	0	1	-1
30795096	TTG	PCTP	intronic	ENSCAFG00000017369.4	.	1	0	1
30795096	TTGT	PCTP	intronic	ENSCAFG00000017369.4	.	0	1	-1
30795098	GT	PCTP	intronic	ENSCAFG00000017369.4	.	0	5	-5
30795100	ATGTGTGTGTGT	PCTP	intronic	ENSCAFG00000017369.4	.	1	0	1
30795100	G	PCTP	intronic	ENSCAFG00000017369.4	.	1	19	-18
30795180	G	PCTP	intronic	ENSCAFG00000017369.4	.	2	23	-21
30795412	A	PCTP	intronic	ENSCAFG00000017369.4	.	2	24	-22
30795505	C	PCTP	intronic	ENSCAFG00000017369.4	.	2	24	-22
30795528	G	PCTP	intronic	ENSCAFG00000017369.4	.	2	24	-22
30795600	A	PCTP	intronic	ENSCAFG00000017369.4	.	2	24	-22
30795659	G	PCTP	intronic	ENSCAFG00000017369.4	.	2	24	-22
30795705	TTCTC	PCTP	intronic	ENSCAFG00000017369.4	.	0	2	-2
30795705	TTCTCTCT	PCTP	intronic	ENSCAFG00000017369.4	.	2	22	-20
30795737	ATC	PCTP	intronic	ENSCAFG00000017369.4	.	2	23	-21
30795781	G	PCTP	intronic	ENSCAFG00000017369.4	.	2	24	-22
30795844	G	PCTP	intronic	ENSCAFG00000017369.4	.	2	24	-22
30795904	T	PCTP	intronic	ENSCAFG00000017369.4	.	2	24	-22
30795995	A	PCTP	intronic	ENSCAFG00000017369.4	.	2	24	-22
30796076	CAAGAAAGAA	PCTP	intronic	ENSCAFG00000017369.4	.	0	1	-1
30796078	AGAAT	PCTP	intronic	ENSCAFG00000017369.4	.	1	6	-5
30796078	AGAATGAATGAATGAATGAATGAAT	PCTP	intronic	ENSCAFG00000017369.4	.	1	16	-15
30796080	AATGTATG	PCTP	intronic	ENSCAFG00000017369.4	.	0	1	-1
30796086	TGAAAGAA	PCTP	intronic	ENSCAFG00000017369.4	.	0	1	-1
30796087	GAATAAAT	PCTP	intronic	ENSCAFG00000017369.4	.	0	1	-1
30796087	GAATTAAT	PCTP	intronic	ENSCAFG00000017369.4	.	0	2	-2
30796093	ATGATTGA	PCTP	intronic	ENSCAFG00000017369.4	.	1	1	0
30796094	TGAAGGAA	PCTP	intronic	ENSCAFG00000017369.4	.	0	1	-1
30796152	C	PCTP	intronic	ENSCAFG00000017369.4	.	2	20	-18
30796239	C	PCTP	intronic	ENSCAFG00000017369.4	.	2	17	-15
30796351	T	PCTP	intronic	ENSCAFG00000017369.4	.	1	4	-3
30796530	GACACACA,GACACA,GACA	PCTP	intronic	ENSCAFG00000017369.4	.	0	1	-1
30796530	GACACACA,GACACACACA,GACACA	PCTP	intronic	ENSCAFG00000017369.4	.	0	1	-1
30796530	GACACACACA	PCTP	intronic	ENSCAFG00000017369.4	.	0	1	-1
30796530	GACACACACA,GACACACA,GACACA	PCTP	intronic	ENSCAFG00000017369.4	.	0	1	-1
30796530	GACACACACA,GACACACACACA	PCTP	intronic	ENSCAFG00000017369.4	.	1	0	1
30796532	C	PCTP	intronic	ENSCAFG00000017369.4	.	1	4	-3
30796532	TACACACACACACACACACACACACACACAC	PCTP	intronic	ENSCAFG00000017369.4	.	5	1	4
30796532	TACACACACACACACACACACACACACACAC,TACACACACACACACACACACACACACACACAC	PCTP	intronic	ENSCAFG00000017369.4	.	1	0	1
30796547	ACACACCCACAC	PCTP	intronic	ENSCAFG00000017369.4	.	0	1	-1
30796551	ACACACCCACAC	PCTP	intronic	ENSCAFG00000017369.4	.	0	1	-1
30796552	CACACACATACACACA	PCTP	intronic	ENSCAFG00000017369.4	.	1	0	1
30796560	CA	PCTP	intronic	ENSCAFG00000017369.4	.	0	1	-1
30796561	A	PCTP	intronic	ENSCAFG00000017369.4	.	1	3	-2
30796561	CACACACA	PCTP	intronic	ENSCAFG00000017369.4	.	0	1	-1
30796569	T	PCTP	intronic	ENSCAFG00000017369.4	.	1	5	-4
30796597	ATT	PCTP	intronic	ENSCAFG00000017369.4	.	0	1	-1
30796656	C	PCTP	intronic	ENSCAFG00000017369.4	.	2	18	-16
30796656	C,A	PCTP	intronic	ENSCAFG00000017369.4	.	0	1	-1
30796951	T	PCTP	intronic	ENSCAFG00000017369.4	.	0	1	-1
30796999	C	PCTP	intronic	ENSCAFG00000017369.4	.	6	24	-18
30797038	T	PCTP	intronic	ENSCAFG00000017369.4	.	2	23	-21
30797116	G	PCTP	intronic	ENSCAFG00000017369.4	.	0	17	-17
30797143	G	PCTP	intronic	ENSCAFG00000017369.4	.	21	15	6
30797192	A	PCTP	intronic	ENSCAFG00000017369.4	.	21	16	5
30797226	T	PCTP	intronic	ENSCAFG00000017369.4	.	0	3	-3
30797260	T	PCTP	intronic	ENSCAFG00000017369.4	.	0	1	-1
30797565	G	PCTP	intronic	ENSCAFG00000017369.4	.	22	14	8
30797687	G	PCTP	intronic	ENSCAFG00000017369.4	.	20	13	7
30797746	G	PCTP	intronic	ENSCAFG00000017369.4	.	17	13	4
30797793	A	PCTP	intronic	ENSCAFG00000017369.4	.	19	12	7
30797939	C	PCTP	intronic	ENSCAFG00000017369.4	.	3	4	-1
30797987	G	PCTP	intronic	ENSCAFG00000017369.4	.	0	6	-6
30797998	G	PCTP	intronic	ENSCAFG00000017369.4	.	0	4	-4
30798035	C	PCTP	intronic	ENSCAFG00000017369.4	.	2	12	-10
30798057	T	PCTP	intronic	ENSCAFG00000017369.4	.	1	13	-12
30798096	C	PCTP	intronic	ENSCAFG00000017369.4	.	1	9	-8
30798162	T	PCTP	intronic	ENSCAFG00000017369.4	.	1	13	-12
30798183	A	PCTP	intronic	ENSCAFG00000017369.4	.	1	14	-13
30798283	C	PCTP	intronic	ENSCAFG00000017369.4	.	2	24	-22
30798302	T	PCTP	intronic	ENSCAFG00000017369.4	.	2	24	-22
30798319	G	PCTP	intronic	ENSCAFG00000017369.4	.	2	24	-22
30798320	T	PCTP	intronic	ENSCAFG00000017369.4	.	2	24	-22
30798323	CTT	PCTP	intronic	ENSCAFG00000017369.4	.	1	1	0
30798323	CTTTTT	PCTP	intronic	ENSCAFG00000017369.4	.	1	22	-21
30798323	CTTTTT,CTTTT	PCTP	intronic	ENSCAFG00000017369.4	.	0	1	-1
30798407	G	PCTP	intronic	ENSCAFG00000017369.4	.	2	24	-22
30798424	T	PCTP	intronic	ENSCAFG00000017369.4	.	2	24	-22
30798522	C	PCTP	intronic	ENSCAFG00000017369.4	.	2	23	-21
30798609	C	PCTP	intronic	ENSCAFG00000017369.4	.	2	21	-19
30798656	A	PCTP	intronic	ENSCAFG00000017369.4	.	1	8	-7
30798657	TGAA	PCTP	intronic	ENSCAFG00000017369.4	.	0	2	-2
30798658	A	PCTP	intronic	ENSCAFG00000017369.4	.	1	8	-7
30798673	C	PCTP	intronic	ENSCAFG00000017369.4	.	0	2	-2
30798765	A	PCTP	intronic	ENSCAFG00000017369.4	.	1	14	-13
30798841	T	PCTP	intronic	ENSCAFG00000017369.4	.	2	9	-7
30798954	CATTGATTGATTGATTGATTGATT	PCTP	intronic	ENSCAFG00000017369.4	.	1	6	-5
30798954	CATTGATTGATTGATTGATTGATTGATT	PCTP	intronic	ENSCAFG00000017369.4	.	1	0	1
30798975	ATT	PCTP	intronic	ENSCAFG00000017369.4	.	0	1	-1
30798990	C	PCTP	intronic	ENSCAFG00000017369.4	.	0	7	-7
30799019	TAGAGAGAGAGAGA	PCTP	intronic	ENSCAFG00000017369.4	.	0	9	-9
30799019	TAGAGAGAGAGAGA,TAGAGAGAGAGA	PCTP	intronic	ENSCAFG00000017369.4	.	0	1	-1
30799019	TAGAGAGAGAGAGAGAGAGA	PCTP	intronic	ENSCAFG00000017369.4	.	1	0	1
30799092	T	PCTP	intronic	ENSCAFG00000017369.4	.	1	0	1
30799092	TGG	PCTP	intronic	ENSCAFG00000017369.4	.	1	11	-10
30799097	A	PCTP	intronic	ENSCAFG00000017369.4	.	2	11	-9
30799099	T	PCTP	intronic	ENSCAFG00000017369.4	.	2	12	-10
30799196	C	PCTP	intronic	ENSCAFG00000017369.4	.	2	23	-21
30799220	GATCT	PCTP	intronic	ENSCAFG00000017369.4	.	0	2	-2
30799220	GATCTAT	PCTP	intronic	ENSCAFG00000017369.4	.	2	22	-20
30799221	ATCTTT	PCTP	intronic	ENSCAFG00000017369.4	.	0	1	-1
30799222	TCTAA	PCTP	intronic	ENSCAFG00000017369.4	.	0	1	-1
30799295	G	PCTP	intronic	ENSCAFG00000017369.4	.	2	24	-22
30799317	CT	PCTP	intronic	ENSCAFG00000017369.4	.	2	22	-20
30799330	GATAA	PCTP	intronic	ENSCAFG00000017369.4	.	2	19	-17
30799330	GATAAATAA	PCTP	intronic	ENSCAFG00000017369.4	.	0	3	-3
30799351	TG	PCTP	intronic	ENSCAFG00000017369.4	.	2	10	-8
30799351	TGG	PCTP	intronic	ENSCAFG00000017369.4	.	0	14	-14
30799411	T	PCTP	intronic	ENSCAFG00000017369.4	.	2	24	-22
30799430	A	PCTP	intronic	ENSCAFG00000017369.4	.	2	24	-22
30799484	A	PCTP	intronic	ENSCAFG00000017369.4	.	2	24	-22
30799577	G	PCTP	intronic	ENSCAFG00000017369.4	.	2	24	-22
30799632	C	PCTP	intronic	ENSCAFG00000017369.4	.	2	24	-22
30799734	G	PCTP	intronic	ENSCAFG00000017369.4	.	2	24	-22
30799743	C	PCTP	intronic	ENSCAFG00000017369.4	.	2	24	-22
30799825	A	PCTP	intronic	ENSCAFG00000017369.4	.	2	24	-22
30799833	G	PCTP	intronic	ENSCAFG00000017369.4	.	2	24	-22
30799849	A	PCTP	intronic	ENSCAFG00000017369.4	.	2	24	-22
30799860	A	PCTP	intronic	ENSCAFG00000017369.4	.	2	24	-22
30799871	A	PCTP	intronic	ENSCAFG00000017369.4	.	2	24	-22
30800066	C	PCTP	intronic	ENSCAFG00000017369.4	.	2	24	-22
30800068	TAAA	PCTP	intronic	ENSCAFG00000017369.4	.	2	24	-22
30800248	T	PCTP	intronic	ENSCAFG00000017369.4	.	2	24	-22
30800370	G	PCTP	intronic	ENSCAFG00000017369.4	.	2	24	-22
30800387	GTTCATAACATTTTA	PCTP	intronic	ENSCAFG00000017369.4	.	0	3	-3
30800388	C	PCTP	intronic	ENSCAFG00000017369.4	.	0	3	-3
30800388	CTCATAACATTTTA	PCTP	intronic	ENSCAFG00000017369.4	.	3	21	-18
30801144	T	PCTP	intronic	ENSCAFG00000017369.4	.	2	24	-22
30801151	A	PCTP	intronic	ENSCAFG00000017369.4	.	2	24	-22
30801401	G	PCTP	intronic	ENSCAFG00000017369.4	.	2	24	-22
30801530	G	PCTP	intronic	ENSCAFG00000017369.4	.	2	24	-22
30801541	A	PCTP	intronic	ENSCAFG00000017369.4	.	2	24	-22
30801643	CTTTT	PCTP	intronic	ENSCAFG00000017369.4	.	2	24	-22
30801720	T	PCTP	intronic	ENSCAFG00000017369.4	.	2	24	-22
30801790	T	PCTP	intronic	ENSCAFG00000017369.4	.	2	24	-22
30801814	G	PCTP	intronic	ENSCAFG00000017369.4	.	2	22	-20
30801872	G	PCTP	intronic	ENSCAFG00000017369.4	.	0	3	-3
30801874	G	PCTP	intronic	ENSCAFG00000017369.4	.	0	3	-3
30802017	CCTCTCTCTCTCT	PCTP	intronic	ENSCAFG00000017369.4	.	3	0	3
30802124	T	PCTP	intronic	ENSCAFG00000017369.4	.	1	7	-6
30802125	T	PCTP	intronic	ENSCAFG00000017369.4	.	1	7	-6
30802130	G	PCTP	intronic	ENSCAFG00000017369.4	.	2	7	-5
30802266	T	PCTP	intronic	ENSCAFG00000017369.4	.	2	24	-22
30802500	T	PCTP	intronic	ENSCAFG00000017369.4	.	2	23	-21
30802500	T,G	PCTP	intronic	ENSCAFG00000017369.4	.	0	1	-1
30802675	TA	PCTP	intronic	ENSCAFG00000017369.4	.	1	22	-21
30802819	A	PCTP	intronic	ENSCAFG00000017369.4	.	2	24	-22
30803025	T	PCTP	intronic	ENSCAFG00000017369.4	.	2	24	-22
30803192	A	PCTP	intronic	ENSCAFG00000017369.4	.	2	24	-22
30803459	A	PCTP	exonic	ENSCAFG00000017369.4	nonsynonymous_SNV	2	24	-22
30803518	AT	PCTP	intronic	ENSCAFG00000017369.4	.	0	2	-2
30803518	ATTTTTTT	PCTP	intronic	ENSCAFG00000017369.4	.	2	22	-20
30804098	ATT	PCTP	intronic	ENSCAFG00000017369.4	.	2	24	-22
30804546	C	PCTP	intronic	ENSCAFG00000017369.4	.	2	24	-22
30804715	A	PCTP	intronic	ENSCAFG00000017369.4	.	2	24	-22
30804740	T	PCTP	intronic	ENSCAFG00000017369.4	.	2	24	-22
30804806	C	PCTP	intronic	ENSCAFG00000017369.4	.	2	24	-22
30804817	G	PCTP	intronic	ENSCAFG00000017369.4	.	2	24	-22
30805089	T	PCTP	intronic	ENSCAFG00000017369.4	.	2	24	-22
30805106	T	PCTP	intronic	ENSCAFG00000017369.4	.	2	24	-22
30805245	A	PCTP	intronic	ENSCAFG00000017369.4	.	2	24	-22
30805314	C	PCTP	intronic	ENSCAFG00000017369.4	.	2	24	-22
30805432	G	PCTP	intronic	ENSCAFG00000017369.4	.	2	24	-22
30805574	T	PCTP	intronic	ENSCAFG00000017369.4	.	2	24	-22
30805654	A	PCTP	intronic	ENSCAFG00000017369.4	.	3	24	-21
30805725	TAAC	PCTP	intronic	ENSCAFG00000017369.4	.	0	1	-1
30805725	TAACAA	PCTP	intronic	ENSCAFG00000017369.4	.	3	23	-20
30805727	ACAC	PCTP	intronic	ENSCAFG00000017369.4	.	0	1	-1
30805734	G	PCTP	intronic	ENSCAFG00000017369.4	.	3	24	-21
30805754	G	PCTP	intronic	ENSCAFG00000017369.4	.	2	24	-22
30806293	C	PCTP	intronic	ENSCAFG00000017369.4	.	2	24	-22
30806991	C	PCTP	intronic	ENSCAFG00000017369.4	.	2	24	-22
30807285	T	PCTP	intronic	ENSCAFG00000017369.4	.	2	24	-22
30807296	A	PCTP	intronic	ENSCAFG00000017369.4	.	2	24	-22
30807332	GA	PCTP	intronic	ENSCAFG00000017369.4	.	1	0	1
30807332	GAA	PCTP	intronic	ENSCAFG00000017369.4	.	1	24	-23
30807358	C	PCTP	intronic	ENSCAFG00000017369.4	.	2	24	-22
30807490	T	PCTP	intronic	ENSCAFG00000017369.4	.	2	24	-22
30807713	C	PCTP	intronic	ENSCAFG00000017369.4	.	2	24	-22
30807724	A	PCTP	intronic	ENSCAFG00000017369.4	.	2	24	-22
30807968	C	PCTP	intronic	ENSCAFG00000017369.4	.	0	1	-1
30807968	CTTTTTTT	PCTP	intronic	ENSCAFG00000017369.4	.	2	22	-20
30807968	CTTTTTTT,CTTTTTTTT	PCTP	intronic	ENSCAFG00000017369.4	.	0	1	-1
30808173	C	PCTP	intronic	ENSCAFG00000017369.4	.	2	24	-22
30808417	A	PCTP	intronic	ENSCAFG00000017369.4	.	2	22	-20
30808737	G	PCTP	intronic	ENSCAFG00000017369.4	.	2	23	-21
30808737	G,T	PCTP	intronic	ENSCAFG00000017369.4	.	0	1	-1
30808940	GTTTA	PCTP	intronic	ENSCAFG00000017369.4	.	0	2	-2
30808940	GTTTATTTA	PCTP	intronic	ENSCAFG00000017369.4	.	2	22	-20
30808942	TTATGTA	PCTP	intronic	ENSCAFG00000017369.4	.	0	1	-1
30808944	ATTTC	PCTP	intronic	ENSCAFG00000017369.4	.	0	1	-1
30809000	A	PCTP	intronic	ENSCAFG00000017369.4	.	2	24	-22
30809164	T	PCTP	intronic	ENSCAFG00000017369.4	.	1	22	-21
30809211	C	PCTP	intronic	ENSCAFG00000017369.4	.	2	23	-21
30809335	T	PCTP	intronic	ENSCAFG00000017369.4	.	2	23	-21
30809602	A	PCTP	intronic	ENSCAFG00000017369.4	.	2	24	-22
30809613	C	PCTP	intronic	ENSCAFG00000017369.4	.	2	24	-22
30809629	C	PCTP	intronic	ENSCAFG00000017369.4	.	2	24	-22
30810272	C	PCTP	intronic	ENSCAFG00000017369.4	.	2	24	-22
30810572	G	PCTP	intronic	ENSCAFG00000017369.4	.	2	24	-22
30810905	T	PCTP	downstream	ENSCAFG00000017369.4	.	2	24	-22
30811553	T	PCTP	downstream	ENSCAFG00000017369.4	.	2	24	-22
30811777	G	PCTP,RPL37A	intergenic	ENSCAFG00000017369.4,ENSCAFG00000024313.2	.	2	24	-22
30812067	G	PCTP,RPL37A	intergenic	ENSCAFG00000017369.4,ENSCAFG00000024313.2	.	2	24	-22
30812112	T	PCTP,RPL37A	intergenic	ENSCAFG00000017369.4,ENSCAFG00000024313.2	.	2	0	2
30812186	C	PCTP,RPL37A	intergenic	ENSCAFG00000017369.4,ENSCAFG00000024313.2	.	20	13	7
30812187	A	PCTP,RPL37A	intergenic	ENSCAFG00000017369.4,ENSCAFG00000024313.2	.	20	13	7
30812231	T	PCTP,RPL37A	intergenic	ENSCAFG00000017369.4,ENSCAFG00000024313.2	.	19	10	9
30812274	C	PCTP,RPL37A	intergenic	ENSCAFG00000017369.4,ENSCAFG00000024313.2	.	22	13	9
30812295	TGGG	PCTP,RPL37A	intergenic	ENSCAFG00000017369.4,ENSCAFG00000024313.2	.	0	8	-8
30812295	TGGGGGGGGGG	PCTP,RPL37A	intergenic	ENSCAFG00000017369.4,ENSCAFG00000024313.2	.	0	1	-1
30812564	G	PCTP,RPL37A	intergenic	ENSCAFG00000017369.4,ENSCAFG00000024313.2	.	12	6	6
30812571	C	PCTP,RPL37A	intergenic	ENSCAFG00000017369.4,ENSCAFG00000024313.2	.	10	5	5
30812755	C	PCTP,RPL37A	intergenic	ENSCAFG00000017369.4,ENSCAFG00000024313.2	.	1	3	-2
30812756	A	PCTP,RPL37A	intergenic	ENSCAFG00000017369.4,ENSCAFG00000024313.2	.	3	1	2
30812757	G	PCTP,RPL37A	intergenic	ENSCAFG00000017369.4,ENSCAFG00000024313.2	.	4	4	0
30812757	GC	PCTP,RPL37A	intergenic	ENSCAFG00000017369.4,ENSCAFG00000024313.2	.	20	20	0
30812838	CT	PCTP,RPL37A	intergenic	ENSCAFG00000017369.4,ENSCAFG00000024313.2	.	0	1	-1
30812840	C	PCTP,RPL37A	intergenic	ENSCAFG00000017369.4,ENSCAFG00000024313.2	.	0	1	-1
30812840	CTTTTTTTTTT	PCTP,RPL37A	intergenic	ENSCAFG00000017369.4,ENSCAFG00000024313.2	.	1	3	-2
30812840	CTTTTTTTTTT,CTTTTTTTT,CTTTTTTTTT	PCTP,RPL37A	intergenic	ENSCAFG00000017369.4,ENSCAFG00000024313.2	.	0	1	-1
30812840	CTTTTTTTTTT,CTTTTTTTTT	PCTP,RPL37A	intergenic	ENSCAFG00000017369.4,ENSCAFG00000024313.2	.	1	5	-4
30812840	CTTTTTTTTTT,CTTTTTTTTT,CTTTTTTTTTTT	PCTP,RPL37A	intergenic	ENSCAFG00000017369.4,ENSCAFG00000024313.2	.	0	10	-10
30812840	CTTTTTTTTTT,CTTTTTTTTT,CTTTTTTTTTTTT	PCTP,RPL37A	intergenic	ENSCAFG00000017369.4,ENSCAFG00000024313.2	.	0	1	-1
30812840	CTTTTTTTTTT,CTTTTTTTTT,CTTTTTTTTTTTTTTTT	PCTP,RPL37A	intergenic	ENSCAFG00000017369.4,ENSCAFG00000024313.2	.	0	1	-1
30812840	CTTTTTTTTTT,CTTTTTTTTTTT	PCTP,RPL37A	intergenic	ENSCAFG00000017369.4,ENSCAFG00000024313.2	.	0	1	-1
30812982	G	PCTP,RPL37A	intergenic	ENSCAFG00000017369.4,ENSCAFG00000024313.2	.	2	24	-22
30812986	G	PCTP,RPL37A	intergenic	ENSCAFG00000017369.4,ENSCAFG00000024313.2	.	2	24	-22
30813023	C	PCTP,RPL37A	intergenic	ENSCAFG00000017369.4,ENSCAFG00000024313.2	.	2	24	-22
30813029	C	PCTP,RPL37A	intergenic	ENSCAFG00000017369.4,ENSCAFG00000024313.2	.	2	24	-22
30813153	A	PCTP,RPL37A	intergenic	ENSCAFG00000017369.4,ENSCAFG00000024313.2	.	2	24	-22
30813319	C	PCTP,RPL37A	intergenic	ENSCAFG00000017369.4,ENSCAFG00000024313.2	.	2	24	-22
30813524	T	PCTP,RPL37A	intergenic	ENSCAFG00000017369.4,ENSCAFG00000024313.2	.	2	24	-22
30813547	T	PCTP,RPL37A	intergenic	ENSCAFG00000017369.4,ENSCAFG00000024313.2	.	2	24	-22
30813548	G	PCTP,RPL37A	intergenic	ENSCAFG00000017369.4,ENSCAFG00000024313.2	.	2	24	-22
30813618	T	PCTP,RPL37A	intergenic	ENSCAFG00000017369.4,ENSCAFG00000024313.2	.	2	24	-22
30813623	TC	PCTP,RPL37A	intergenic	ENSCAFG00000017369.4,ENSCAFG00000024313.2	.	2	24	-22
30813662	G	PCTP,RPL37A	intergenic	ENSCAFG00000017369.4,ENSCAFG00000024313.2	.	2	24	-22
30813866	T	PCTP,RPL37A	intergenic	ENSCAFG00000017369.4,ENSCAFG00000024313.2	.	2	24	-22
30813911	T	PCTP,RPL37A	intergenic	ENSCAFG00000017369.4,ENSCAFG00000024313.2	.	2	23	-21
30813978	G	PCTP,RPL37A	intergenic	ENSCAFG00000017369.4,ENSCAFG00000024313.2	.	0	2	-2
30813979	A	PCTP,RPL37A	intergenic	ENSCAFG00000017369.4,ENSCAFG00000024313.2	.	6	1	5
30813979	ATTTTTTTTTTT,ATTTTTTTTTTTT,ATTTTTTTTTTTTT	PCTP,RPL37A	intergenic	ENSCAFG00000017369.4,ENSCAFG00000024313.2	.	0	1	-1
30813979	ATTTTTTTTTTTT	PCTP,RPL37A	intergenic	ENSCAFG00000017369.4,ENSCAFG00000024313.2	.	0	1	-1
30813979	ATTTTTTTTTTTT,ATTTTTTTTTTT	PCTP,RPL37A	intergenic	ENSCAFG00000017369.4,ENSCAFG00000024313.2	.	0	1	-1
30813979	ATTTTTTTTTTTT,ATTTTTTTTTTT,ATTTTTTTTTT	PCTP,RPL37A	intergenic	ENSCAFG00000017369.4,ENSCAFG00000024313.2	.	0	1	-1
30813979	ATTTTTTTTTTTT,ATTTTTTTTTTT,ATTTTTTTTTTTTT	PCTP,RPL37A	intergenic	ENSCAFG00000017369.4,ENSCAFG00000024313.2	.	0	8	-8
30813979	ATTTTTTTTTTTT,ATTTTTTTTTTTTT	PCTP,RPL37A	intergenic	ENSCAFG00000017369.4,ENSCAFG00000024313.2	.	0	1	-1
30813979	ATTTTTTTTTTTT,ATTTTTTTTTTTTT,ATTTTTTTTTTT	PCTP,RPL37A	intergenic	ENSCAFG00000017369.4,ENSCAFG00000024313.2	.	0	1	-1
30813979	ATTTTTTTTTTTT,ATTTTTTTTTTTTTT	PCTP,RPL37A	intergenic	ENSCAFG00000017369.4,ENSCAFG00000024313.2	.	0	1	-1
30813995	G	PCTP,RPL37A	intergenic	ENSCAFG00000017369.4,ENSCAFG00000024313.2	.	2	18	-16
30814017	TGGTTTATCATGTCCTTTTATTATTATTATTATTATTTTTTTATTGGTGTTCAATTTACTAACATACAGAATAACCCCCAGTGCCTGTCACCCATTCACTCCCACCCCCCCGC	PCTP,RPL37A	intergenic	ENSCAFG00000017369.4,ENSCAFG00000024313.2	.	0	3	-3
30814073	A	PCTP,RPL37A	intergenic	ENSCAFG00000017369.4,ENSCAFG00000024313.2	.	2	17	-15
30814116	T	PCTP,RPL37A	intergenic	ENSCAFG00000017369.4,ENSCAFG00000024313.2	.	2	17	-15
30814245	T	PCTP,RPL37A	intergenic	ENSCAFG00000017369.4,ENSCAFG00000024313.2	.	2	13	-11
30814245	T,G	PCTP,RPL37A	intergenic	ENSCAFG00000017369.4,ENSCAFG00000024313.2	.	0	2	-2
30814312	T	PCTP,RPL37A	intergenic	ENSCAFG00000017369.4,ENSCAFG00000024313.2	.	2	16	-14
30814352	TG	PCTP,RPL37A	intergenic	ENSCAFG00000017369.4,ENSCAFG00000024313.2	.	2	9	-7
30814367	A	PCTP,RPL37A	intergenic	ENSCAFG00000017369.4,ENSCAFG00000024313.2	.	2	10	-8
30814405	C	PCTP,RPL37A	intergenic	ENSCAFG00000017369.4,ENSCAFG00000024313.2	.	2	17	-15
30814564	A	PCTP,RPL37A	intergenic	ENSCAFG00000017369.4,ENSCAFG00000024313.2	.	1	23	-22
30814618	A	PCTP,RPL37A	intergenic	ENSCAFG00000017369.4,ENSCAFG00000024313.2	.	2	24	-22
30814676	A	PCTP,RPL37A	intergenic	ENSCAFG00000017369.4,ENSCAFG00000024313.2	.	2	24	-22
30814709	A	PCTP,RPL37A	intergenic	ENSCAFG00000017369.4,ENSCAFG00000024313.2	.	2	24	-22
30814768	T	PCTP,RPL37A	intergenic	ENSCAFG00000017369.4,ENSCAFG00000024313.2	.	2	24	-22
30814794	C	PCTP,RPL37A	intergenic	ENSCAFG00000017369.4,ENSCAFG00000024313.2	.	2	24	-22
30814819	C	PCTP,RPL37A	intergenic	ENSCAFG00000017369.4,ENSCAFG00000024313.2	.	2	24	-22
30814820	C	PCTP,RPL37A	intergenic	ENSCAFG00000017369.4,ENSCAFG00000024313.2	.	2	24	-22
30814888	A	PCTP,RPL37A	intergenic	ENSCAFG00000017369.4,ENSCAFG00000024313.2	.	2	24	-22
30814889	C	PCTP,RPL37A	intergenic	ENSCAFG00000017369.4,ENSCAFG00000024313.2	.	2	22	-20
30814889	C,A	PCTP,RPL37A	intergenic	ENSCAFG00000017369.4,ENSCAFG00000024313.2	.	0	2	-2
30814893	G	PCTP,RPL37A	intergenic	ENSCAFG00000017369.4,ENSCAFG00000024313.2	.	2	24	-22
30814932	A	PCTP,RPL37A	intergenic	ENSCAFG00000017369.4,ENSCAFG00000024313.2	.	2	24	-22
30814988	G	PCTP,RPL37A	intergenic	ENSCAFG00000017369.4,ENSCAFG00000024313.2	.	2	24	-22
30815018	T	PCTP,RPL37A	intergenic	ENSCAFG00000017369.4,ENSCAFG00000024313.2	.	2	24	-22
30815042	G	PCTP,RPL37A	intergenic	ENSCAFG00000017369.4,ENSCAFG00000024313.2	.	2	24	-22
30815044	C	PCTP,RPL37A	intergenic	ENSCAFG00000017369.4,ENSCAFG00000024313.2	.	2	24	-22
30815046	T	PCTP,RPL37A	intergenic	ENSCAFG00000017369.4,ENSCAFG00000024313.2	.	2	24	-22
30815068	G	PCTP,RPL37A	intergenic	ENSCAFG00000017369.4,ENSCAFG00000024313.2	.	2	24	-22
30815100	C	PCTP,RPL37A	intergenic	ENSCAFG00000017369.4,ENSCAFG00000024313.2	.	2	24	-22
30815229	A	PCTP,RPL37A	intergenic	ENSCAFG00000017369.4,ENSCAFG00000024313.2	.	2	24	-22
30815286	A	PCTP,RPL37A	intergenic	ENSCAFG00000017369.4,ENSCAFG00000024313.2	.	2	24	-22
30815323	T	PCTP,RPL37A	intergenic	ENSCAFG00000017369.4,ENSCAFG00000024313.2	.	2	24	-22
30815324	T	PCTP,RPL37A	intergenic	ENSCAFG00000017369.4,ENSCAFG00000024313.2	.	2	24	-22
30815359	C	PCTP,RPL37A	intergenic	ENSCAFG00000017369.4,ENSCAFG00000024313.2	.	2	24	-22
30815360	A	PCTP,RPL37A	intergenic	ENSCAFG00000017369.4,ENSCAFG00000024313.2	.	2	24	-22
30815369	A	PCTP,RPL37A	intergenic	ENSCAFG00000017369.4,ENSCAFG00000024313.2	.	2	24	-22
30815388	G	PCTP,RPL37A	intergenic	ENSCAFG00000017369.4,ENSCAFG00000024313.2	.	2	24	-22
30815420	T	PCTP,RPL37A	intergenic	ENSCAFG00000017369.4,ENSCAFG00000024313.2	.	2	24	-22
30815587	A	PCTP,RPL37A	intergenic	ENSCAFG00000017369.4,ENSCAFG00000024313.2	.	2	24	-22
30815601	G	PCTP,RPL37A	intergenic	ENSCAFG00000017369.4,ENSCAFG00000024313.2	.	2	24	-22
30815738	T	PCTP,RPL37A	intergenic	ENSCAFG00000017369.4,ENSCAFG00000024313.2	.	2	24	-22
30815946	T	PCTP,RPL37A	intergenic	ENSCAFG00000017369.4,ENSCAFG00000024313.2	.	2	24	-22
30816000	A	PCTP,RPL37A	intergenic	ENSCAFG00000017369.4,ENSCAFG00000024313.2	.	2	21	-19
30816002	T	PCTP,RPL37A	intergenic	ENSCAFG00000017369.4,ENSCAFG00000024313.2	.	2	21	-19
30816103	A	PCTP,RPL37A	intergenic	ENSCAFG00000017369.4,ENSCAFG00000024313.2	.	0	4	-4
30816106	C	PCTP,RPL37A	intergenic	ENSCAFG00000017369.4,ENSCAFG00000024313.2	.	0	4	-4
30816165	T	PCTP,RPL37A	intergenic	ENSCAFG00000017369.4,ENSCAFG00000024313.2	.	0	6	-6
30816166	G	PCTP,RPL37A	intergenic	ENSCAFG00000017369.4,ENSCAFG00000024313.2	.	0	6	-6
30816167	A	PCTP,RPL37A	intergenic	ENSCAFG00000017369.4,ENSCAFG00000024313.2	.	0	7	-7
30816179	G	PCTP,RPL37A	intergenic	ENSCAFG00000017369.4,ENSCAFG00000024313.2	.	0	7	-7
30816200	T	PCTP,RPL37A	intergenic	ENSCAFG00000017369.4,ENSCAFG00000024313.2	.	0	6	-6
30816200	TGG	PCTP,RPL37A	intergenic	ENSCAFG00000017369.4,ENSCAFG00000024313.2	.	0	4	-4
30816324	T	PCTP,RPL37A	intergenic	ENSCAFG00000017369.4,ENSCAFG00000024313.2	.	2	23	-21
30816489	A	PCTP,RPL37A	intergenic	ENSCAFG00000017369.4,ENSCAFG00000024313.2	.	2	24	-22
30816566	A	PCTP,RPL37A	intergenic	ENSCAFG00000017369.4,ENSCAFG00000024313.2	.	0	10	-10
30816676	C	PCTP,RPL37A	intergenic	ENSCAFG00000017369.4,ENSCAFG00000024313.2	.	13	6	7
30816681	A	PCTP,RPL37A	intergenic	ENSCAFG00000017369.4,ENSCAFG00000024313.2	.	14	6	8
30816848	C	PCTP,RPL37A	intergenic	ENSCAFG00000017369.4,ENSCAFG00000024313.2	.	2	24	-22
30817092	G	PCTP,RPL37A	intergenic	ENSCAFG00000017369.4,ENSCAFG00000024313.2	.	2	24	-22
30817154	A	PCTP,RPL37A	intergenic	ENSCAFG00000017369.4,ENSCAFG00000024313.2	.	2	24	-22
30817364	C	PCTP,RPL37A	intergenic	ENSCAFG00000017369.4,ENSCAFG00000024313.2	.	2	24	-22
30817379	G	PCTP,RPL37A	intergenic	ENSCAFG00000017369.4,ENSCAFG00000024313.2	.	2	24	-22
30817463	A	PCTP,RPL37A	intergenic	ENSCAFG00000017369.4,ENSCAFG00000024313.2	.	2	24	-22
30817486	G	PCTP,RPL37A	intergenic	ENSCAFG00000017369.4,ENSCAFG00000024313.2	.	2	24	-22
30817492	A	PCTP,RPL37A	intergenic	ENSCAFG00000017369.4,ENSCAFG00000024313.2	.	2	24	-22
30817635	C	PCTP,RPL37A	intergenic	ENSCAFG00000017369.4,ENSCAFG00000024313.2	.	2	24	-22
30817965	C	PCTP,RPL37A	intergenic	ENSCAFG00000017369.4,ENSCAFG00000024313.2	.	2	24	-22
30818865	A	PCTP,RPL37A	intergenic	ENSCAFG00000017369.4,ENSCAFG00000024313.2	.	0	2	-2
30818867	C	PCTP,RPL37A	intergenic	ENSCAFG00000017369.4,ENSCAFG00000024313.2	.	0	2	-2
30818867	CT	PCTP,RPL37A	intergenic	ENSCAFG00000017369.4,ENSCAFG00000024313.2	.	2	22	-20
30819123	T	PCTP,RPL37A	intergenic	ENSCAFG00000017369.4,ENSCAFG00000024313.2	.	2	24	-22
30820629	G	PCTP,RPL37A	intergenic	ENSCAFG00000017369.4,ENSCAFG00000024313.2	.	2	24	-22
30820711	G	PCTP,RPL37A	intergenic	ENSCAFG00000017369.4,ENSCAFG00000024313.2	.	2	24	-22
30822198	T	PCTP,RPL37A	intergenic	ENSCAFG00000017369.4,ENSCAFG00000024313.2	.	3	3	0
30822659	A	PCTP,RPL37A	intergenic	ENSCAFG00000017369.4,ENSCAFG00000024313.2	.	24	24	0
30824389	A	PCTP,RPL37A	intergenic	ENSCAFG00000017369.4,ENSCAFG00000024313.2	.	23	2	21
30824389	A,C	PCTP,RPL37A	intergenic	ENSCAFG00000017369.4,ENSCAFG00000024313.2	.	1	0	1
30824431	C	PCTP,RPL37A	intergenic	ENSCAFG00000017369.4,ENSCAFG00000024313.2	.	2	22	-20
30824431	C,T	PCTP,RPL37A	intergenic	ENSCAFG00000017369.4,ENSCAFG00000024313.2	.	0	2	-2
30824720	C	PCTP,RPL37A	intergenic	ENSCAFG00000017369.4,ENSCAFG00000024313.2	.	0	12	-12
30824728	C	PCTP,RPL37A	intergenic	ENSCAFG00000017369.4,ENSCAFG00000024313.2	.	0	13	-13
30824779	C	PCTP,RPL37A	intergenic	ENSCAFG00000017369.4,ENSCAFG00000024313.2	.	0	12	-12
30824909	G	PCTP,RPL37A	intergenic	ENSCAFG00000017369.4,ENSCAFG00000024313.2	.	0	11	-11
30824980	T	PCTP,RPL37A	intergenic	ENSCAFG00000017369.4,ENSCAFG00000024313.2	.	0	13	-13
30825193	T	PCTP,RPL37A	intergenic	ENSCAFG00000017369.4,ENSCAFG00000024313.2	.	0	14	-14
30825318	G	PCTP,RPL37A	intergenic	ENSCAFG00000017369.4,ENSCAFG00000024313.2	.	0	14	-14
30826653	C	PCTP,RPL37A	intergenic	ENSCAFG00000017369.4,ENSCAFG00000024313.2	.	0	14	-14
30827455	G	PCTP,RPL37A	intergenic	ENSCAFG00000017369.4,ENSCAFG00000024313.2	.	0	14	-14
30827500	G	PCTP,RPL37A	intergenic	ENSCAFG00000017369.4,ENSCAFG00000024313.2	.	0	14	-14
30827599	G	PCTP,RPL37A	intergenic	ENSCAFG00000017369.4,ENSCAFG00000024313.2	.	0	14	-14
30827858	C	PCTP,RPL37A	intergenic	ENSCAFG00000017369.4,ENSCAFG00000024313.2	.	0	14	-14
30828150	C	PCTP,RPL37A	intergenic	ENSCAFG00000017369.4,ENSCAFG00000024313.2	.	0	14	-14
30828283	TAAAAAAAAAA	PCTP,RPL37A	intergenic	ENSCAFG00000017369.4,ENSCAFG00000024313.2	.	0	14	-14
30828684	C	PCTP,RPL37A	intergenic	ENSCAFG00000017369.4,ENSCAFG00000024313.2	.	24	2	22
30828935	G	PCTP,RPL37A	intergenic	ENSCAFG00000017369.4,ENSCAFG00000024313.2	.	0	6	-6
30829261	T	PCTP,RPL37A	intergenic	ENSCAFG00000017369.4,ENSCAFG00000024313.2	.	0	10	-10
30829429	T	PCTP,RPL37A	intergenic	ENSCAFG00000017369.4,ENSCAFG00000024313.2	.	0	11	-11
30829435	G	PCTP,RPL37A	intergenic	ENSCAFG00000017369.4,ENSCAFG00000024313.2	.	0	11	-11
30829449	T	PCTP,RPL37A	intergenic	ENSCAFG00000017369.4,ENSCAFG00000024313.2	.	0	11	-11
30829468	T	PCTP,RPL37A	intergenic	ENSCAFG00000017369.4,ENSCAFG00000024313.2	.	0	11	-11
30829526	A	PCTP,RPL37A	intergenic	ENSCAFG00000017369.4,ENSCAFG00000024313.2	.	0	14	-14
30829546	G	PCTP,RPL37A	intergenic	ENSCAFG00000017369.4,ENSCAFG00000024313.2	.	0	14	-14
30829715	T	PCTP,RPL37A	intergenic	ENSCAFG00000017369.4,ENSCAFG00000024313.2	.	0	14	-14
30830233	G	PCTP,RPL37A	intergenic	ENSCAFG00000017369.4,ENSCAFG00000024313.2	.	0	14	-14
30830491	T	PCTP,RPL37A	intergenic	ENSCAFG00000017369.4,ENSCAFG00000024313.2	.	0	14	-14
30830685	C	PCTP,RPL37A	intergenic	ENSCAFG00000017369.4,ENSCAFG00000024313.2	.	0	14	-14
30830732	CT	PCTP,RPL37A	intergenic	ENSCAFG00000017369.4,ENSCAFG00000024313.2	.	0	14	-14
30831096	TGAGAGAGAGAGAGAGAGAGAGAGAG	PCTP,RPL37A	intergenic	ENSCAFG00000017369.4,ENSCAFG00000024313.2	.	0	2	-2
30831096	TGAGAGAGAGAGAGAGAGAGAGAGAGAG	PCTP,RPL37A	intergenic	ENSCAFG00000017369.4,ENSCAFG00000024313.2	.	0	1	-1
30831096	TGAGAGAGAGAGAGAGAGAGAGAGAGAGAG	PCTP,RPL37A	intergenic	ENSCAFG00000017369.4,ENSCAFG00000024313.2	.	0	2	-2
30831096	TGAGAGAGAGAGAGAGAGAGAGAGAGAGAG,TGAGAGAGAGAGAGAGAGAGAGAGAG,TGAGAGAGAGAGAGAGAGAGAGAGAGAG	PCTP,RPL37A	intergenic	ENSCAFG00000017369.4,ENSCAFG00000024313.2	.	0	1	-1
30831098	AGAGAGAGAGAGAGAGCGAGAGAGAGAG	PCTP,RPL37A	intergenic	ENSCAFG00000017369.4,ENSCAFG00000024313.2	.	0	1	-1
30831098	AGAGAGAGAGAGAGCGAGAGAGAGAG	PCTP,RPL37A	intergenic	ENSCAFG00000017369.4,ENSCAFG00000024313.2	.	0	1	-1
30831102	AGAGAGAGAGAGAGAGGGAGAGAG	PCTP,RPL37A	intergenic	ENSCAFG00000017369.4,ENSCAFG00000024313.2	.	0	1	-1
30831106	AGAGAGAGAGAGAGAGGGAG	PCTP,RPL37A	intergenic	ENSCAFG00000017369.4,ENSCAFG00000024313.2	.	0	1	-1
30831175	C	PCTP,RPL37A	intergenic	ENSCAFG00000017369.4,ENSCAFG00000024313.2	.	0	10	-10
30831314	G	PCTP,RPL37A	intergenic	ENSCAFG00000017369.4,ENSCAFG00000024313.2	.	0	14	-14
30831677	T	PCTP,RPL37A	intergenic	ENSCAFG00000017369.4,ENSCAFG00000024313.2	.	0	12	-12
30832358	G	PCTP,RPL37A	intergenic	ENSCAFG00000017369.4,ENSCAFG00000024313.2	.	0	7	-7
30832472	C	PCTP,RPL37A	intergenic	ENSCAFG00000017369.4,ENSCAFG00000024313.2	.	0	2	-2
30832472	CCTCTCTCTCTCTCTCT	PCTP,RPL37A	intergenic	ENSCAFG00000017369.4,ENSCAFG00000024313.2	.	1	1	0
30832472	CCTCTCTCTCTCTCTCTCT	PCTP,RPL37A	intergenic	ENSCAFG00000017369.4,ENSCAFG00000024313.2	.	4	3	1
30832472	CCTCTCTCTCTCTCTCTCTCTCT	PCTP,RPL37A	intergenic	ENSCAFG00000017369.4,ENSCAFG00000024313.2	.	1	0	1
30832489	CT	PCTP,RPL37A	intergenic	ENSCAFG00000017369.4,ENSCAFG00000024313.2	.	0	2	-2
30832491	C	PCTP,RPL37A	intergenic	ENSCAFG00000017369.4,ENSCAFG00000024313.2	.	0	1	-1
30832491	CTGTGTGTGT	PCTP,RPL37A	intergenic	ENSCAFG00000017369.4,ENSCAFG00000024313.2	.	0	7	-7
30832493	C	PCTP,RPL37A	intergenic	ENSCAFG00000017369.4,ENSCAFG00000024313.2	.	1	0	1
30832495	G	PCTP,RPL37A	intergenic	ENSCAFG00000017369.4,ENSCAFG00000024313.2	.	1	0	1
30832495	GTGTGTGT	PCTP,RPL37A	intergenic	ENSCAFG00000017369.4,ENSCAFG00000024313.2	.	1	0	1
30832497	GTGTGT	PCTP,RPL37A	intergenic	ENSCAFG00000017369.4,ENSCAFG00000024313.2	.	1	0	1
30832507	C	PCTP,RPL37A	intergenic	ENSCAFG00000017369.4,ENSCAFG00000024313.2	.	3	0	3
30832509	C	PCTP,RPL37A	intergenic	ENSCAFG00000017369.4,ENSCAFG00000024313.2	.	3	0	3
30832563	G	PCTP,RPL37A	intergenic	ENSCAFG00000017369.4,ENSCAFG00000024313.2	.	23	10	13
30832565	C	PCTP,RPL37A	intergenic	ENSCAFG00000017369.4,ENSCAFG00000024313.2	.	1	2	-1
30832565	CTAT	PCTP,RPL37A	intergenic	ENSCAFG00000017369.4,ENSCAFG00000024313.2	.	23	8	15
30832565	CTATAT	PCTP,RPL37A	intergenic	ENSCAFG00000017369.4,ENSCAFG00000024313.2	.	0	1	-1
30832803	A	PCTP,RPL37A	intergenic	ENSCAFG00000017369.4,ENSCAFG00000024313.2	.	0	14	-14
30832897	C	PCTP,RPL37A	intergenic	ENSCAFG00000017369.4,ENSCAFG00000024313.2	.	24	15	9
30832972	T	PCTP,RPL37A	intergenic	ENSCAFG00000017369.4,ENSCAFG00000024313.2	.	23	10	13
30833006	A	PCTP,RPL37A	intergenic	ENSCAFG00000017369.4,ENSCAFG00000024313.2	.	23	1	22
30833071	G	PCTP,RPL37A	intergenic	ENSCAFG00000017369.4,ENSCAFG00000024313.2	.	0	3	-3
30833074	T	PCTP,RPL37A	intergenic	ENSCAFG00000017369.4,ENSCAFG00000024313.2	.	0	3	-3
30833086	A	PCTP,RPL37A	intergenic	ENSCAFG00000017369.4,ENSCAFG00000024313.2	.	0	3	-3
30833087	T	PCTP,RPL37A	intergenic	ENSCAFG00000017369.4,ENSCAFG00000024313.2	.	0	3	-3
30833144	A	PCTP,RPL37A	intergenic	ENSCAFG00000017369.4,ENSCAFG00000024313.2	.	2	14	-12
30833189	T	PCTP,RPL37A	intergenic	ENSCAFG00000017369.4,ENSCAFG00000024313.2	.	0	14	-14
30833200	A	PCTP,RPL37A	intergenic	ENSCAFG00000017369.4,ENSCAFG00000024313.2	.	0	14	-14
30833201	T	PCTP,RPL37A	intergenic	ENSCAFG00000017369.4,ENSCAFG00000024313.2	.	0	14	-14
30833360	A	PCTP,RPL37A	intergenic	ENSCAFG00000017369.4,ENSCAFG00000024313.2	.	0	14	-14
30833482	T	PCTP,RPL37A	intergenic	ENSCAFG00000017369.4,ENSCAFG00000024313.2	.	0	14	-14
30833796	T	PCTP,RPL37A	intergenic	ENSCAFG00000017369.4,ENSCAFG00000024313.2	.	0	9	-9
30833796	TAAAAAAAA	PCTP,RPL37A	intergenic	ENSCAFG00000017369.4,ENSCAFG00000024313.2	.	0	2	-2
30833988	G	PCTP,RPL37A	intergenic	ENSCAFG00000017369.4,ENSCAFG00000024313.2	.	0	14	-14
30834014	A	PCTP,RPL37A	intergenic	ENSCAFG00000017369.4,ENSCAFG00000024313.2	.	0	14	-14
30834230	C	PCTP,RPL37A	intergenic	ENSCAFG00000017369.4,ENSCAFG00000024313.2	.	0	14	-14
30834690	GTGCCTGCC	PCTP,RPL37A	intergenic	ENSCAFG00000017369.4,ENSCAFG00000024313.2	.	0	1	-1
30834764	T	PCTP,RPL37A	intergenic	ENSCAFG00000017369.4,ENSCAFG00000024313.2	.	0	14	-14
30834981	T	PCTP,RPL37A	intergenic	ENSCAFG00000017369.4,ENSCAFG00000024313.2	.	0	14	-14
30834998	A	PCTP,RPL37A	intergenic	ENSCAFG00000017369.4,ENSCAFG00000024313.2	.	0	14	-14
30835227	A	PCTP,RPL37A	intergenic	ENSCAFG00000017369.4,ENSCAFG00000024313.2	.	0	14	-14
30835231	T	PCTP,RPL37A	intergenic	ENSCAFG00000017369.4,ENSCAFG00000024313.2	.	0	14	-14
30835269	G	PCTP,RPL37A	intergenic	ENSCAFG00000017369.4,ENSCAFG00000024313.2	.	0	14	-14
30835293	A	PCTP,RPL37A	intergenic	ENSCAFG00000017369.4,ENSCAFG00000024313.2	.	0	14	-14
30835294	CTTT	PCTP,RPL37A	intergenic	ENSCAFG00000017369.4,ENSCAFG00000024313.2	.	0	14	-14
30835510	G	PCTP,RPL37A	intergenic	ENSCAFG00000017369.4,ENSCAFG00000024313.2	.	0	14	-14
30835548	T	PCTP,RPL37A	intergenic	ENSCAFG00000017369.4,ENSCAFG00000024313.2	.	0	14	-14
30835608	A	PCTP,RPL37A	intergenic	ENSCAFG00000017369.4,ENSCAFG00000024313.2	.	0	14	-14
30835677	A	PCTP,RPL37A	intergenic	ENSCAFG00000017369.4,ENSCAFG00000024313.2	.	0	14	-14
30835933	C	PCTP,RPL37A	intergenic	ENSCAFG00000017369.4,ENSCAFG00000024313.2	.	0	14	-14
30836053	T	PCTP,RPL37A	intergenic	ENSCAFG00000017369.4,ENSCAFG00000024313.2	.	0	14	-14
30836057	G	PCTP,RPL37A	intergenic	ENSCAFG00000017369.4,ENSCAFG00000024313.2	.	0	14	-14
30836253	A	PCTP,RPL37A	intergenic	ENSCAFG00000017369.4,ENSCAFG00000024313.2	.	0	14	-14
30836261	T	PCTP,RPL37A	intergenic	ENSCAFG00000017369.4,ENSCAFG00000024313.2	.	0	14	-14
30836471	T	PCTP,RPL37A	intergenic	ENSCAFG00000017369.4,ENSCAFG00000024313.2	.	0	7	-7
30836537	TAA	PCTP,RPL37A	intergenic	ENSCAFG00000017369.4,ENSCAFG00000024313.2	.	0	3	-3
30836561	CGAGAGAGAGAGAGAGAGAGAGAGAGAG	PCTP,RPL37A	intergenic	ENSCAFG00000017369.4,ENSCAFG00000024313.2	.	0	1	-1
30836598	C	PCTP,RPL37A	intergenic	ENSCAFG00000017369.4,ENSCAFG00000024313.2	.	0	4	-4
30836652	C	PCTP,RPL37A	intergenic	ENSCAFG00000017369.4,ENSCAFG00000024313.2	.	0	4	-4
30836748	AT	PCTP,RPL37A	intergenic	ENSCAFG00000017369.4,ENSCAFG00000024313.2	.	0	1	-1
30836759	G	PCTP,RPL37A	intergenic	ENSCAFG00000017369.4,ENSCAFG00000024313.2	.	0	5	-5
30836996	T	PCTP,RPL37A	intergenic	ENSCAFG00000017369.4,ENSCAFG00000024313.2	.	0	4	-4
30837010	T	PCTP,RPL37A	intergenic	ENSCAFG00000017369.4,ENSCAFG00000024313.2	.	0	7	-7
30837502	A	PCTP,RPL37A	intergenic	ENSCAFG00000017369.4,ENSCAFG00000024313.2	.	0	14	-14
30837660	T	PCTP,RPL37A	intergenic	ENSCAFG00000017369.4,ENSCAFG00000024313.2	.	0	14	-14
30837890	C	PCTP,RPL37A	intergenic	ENSCAFG00000017369.4,ENSCAFG00000024313.2	.	0	14	-14
30838633	C	PCTP,RPL37A	intergenic	ENSCAFG00000017369.4,ENSCAFG00000024313.2	.	0	14	-14
30838693	T	PCTP,RPL37A	intergenic	ENSCAFG00000017369.4,ENSCAFG00000024313.2	.	0	14	-14
30838812	A	PCTP,RPL37A	intergenic	ENSCAFG00000017369.4,ENSCAFG00000024313.2	.	0	14	-14
30838904	A	PCTP,RPL37A	intergenic	ENSCAFG00000017369.4,ENSCAFG00000024313.2	.	0	14	-14
30838905	A	PCTP,RPL37A	intergenic	ENSCAFG00000017369.4,ENSCAFG00000024313.2	.	0	14	-14
30840031	T	PCTP,RPL37A	intergenic	ENSCAFG00000017369.4,ENSCAFG00000024313.2	.	0	4	-4
30840430	T	PCTP,RPL37A	intergenic	ENSCAFG00000017369.4,ENSCAFG00000024313.2	.	0	13	-13
30840778	T	PCTP,RPL37A	intergenic	ENSCAFG00000017369.4,ENSCAFG00000024313.2	.	0	9	-9
30840918	T	PCTP,RPL37A	intergenic	ENSCAFG00000017369.4,ENSCAFG00000024313.2	.	0	14	-14
30841403	T	PCTP,RPL37A	intergenic	ENSCAFG00000017369.4,ENSCAFG00000024313.2	.	0	14	-14
30841971	TAGTGTGAGTGTG	PCTP,RPL37A	intergenic	ENSCAFG00000017369.4,ENSCAFG00000024313.2	.	0	1	-1
30841972	A	PCTP,RPL37A	intergenic	ENSCAFG00000017369.4,ENSCAFG00000024313.2	.	1	0	1
30841972	AGTGTGTGTGTGTGTGTGTGTGTGTGTGTGTGTGT,AGTGTGTGTGTGTGTGTGTGTGTGTGTGTGTGTGTGT,AGTGTGTGTGTGTGTGTGTGTGTGTGT	PCTP,RPL37A	intergenic	ENSCAFG00000017369.4,ENSCAFG00000024313.2	.	1	0	1
30841972	AGTGTGTGTGTGTGTGTGTGTGTGTGTGTGTGTGT,AGTGTGTGTGTGTGTGTGTGTGTGTGTGTGTGTGTGTGT,AGTGTGTGTGTGTGTGTGTGTGTGTGTGTGT	PCTP,RPL37A	intergenic	ENSCAFG00000017369.4,ENSCAFG00000024313.2	.	1	0	1
30841972	AGTGTGTGTGTGTGTGTGTGTGTGTGTGTGTGTGT,AGTGTGTGTGTGTGTGTGTGTGTGTGTGTGTGTGTGTGT,AGTGTGTGTGTGTGTGTGTGTGTGTGTGTGTGTGTGT	PCTP,RPL37A	intergenic	ENSCAFG00000017369.4,ENSCAFG00000024313.2	.	1	0	1
30841972	AGTGTGTGTGTGTGTGTGTGTGTGTGTGTGTGTGTGT	PCTP,RPL37A	intergenic	ENSCAFG00000017369.4,ENSCAFG00000024313.2	.	2	0	2
30841972	AGTGTGTGTGTGTGTGTGTGTGTGTGTGTGTGTGTGT,AGTGTGTGTGTGTGTGTGTGTGTGTGT,AGTGTGTGTGTGTGTGTGTGTGTGTGTGTGTGTGTGTGT	PCTP,RPL37A	intergenic	ENSCAFG00000017369.4,ENSCAFG00000024313.2	.	1	0	1
30841972	AGTGTGTGTGTGTGTGTGTGTGTGTGTGTGTGTGTGT,AGTGTGTGTGTGTGTGTGTGTGTGTGTGTGTGTGT	PCTP,RPL37A	intergenic	ENSCAFG00000017369.4,ENSCAFG00000024313.2	.	1	0	1
30841972	AGTGTGTGTGTGTGTGTGTGTGTGTGTGTGTGTGTGT,AGTGTGTGTGTGTGTGTGTGTGTGTGTGTGTGTGT,AGTGTGTGTGTGTGTGTGTGTGTGTGTGTGTGT	PCTP,RPL37A	intergenic	ENSCAFG00000017369.4,ENSCAFG00000024313.2	.	1	0	1
30841972	AGTGTGTGTGTGTGTGTGTGTGTGTGTGTGTGTGTGT,AGTGTGTGTGTGTGTGTGTGTGTGTGTGTGTGTGTGTGT,AGTGTGTGTGTGTGTGTGTGTGT	PCTP,RPL37A	intergenic	ENSCAFG00000017369.4,ENSCAFG00000024313.2	.	1	0	1
30841972	AGTGTGTGTGTGTGTGTGTGTGTGTGTGTGTGTGTGT,AGTGTGTGTGTGTGTGTGTGTGTGTGTGTGTGTGTGTGT,AGTGTGTGTGTGTGTGTGTGTGTGTGTGTGT	PCTP,RPL37A	intergenic	ENSCAFG00000017369.4,ENSCAFG00000024313.2	.	1	0	1
30841972	AGTGTGTGTGTGTGTGTGTGTGTGTGTGTGTGTGTGT,AGTGTGTGTGTGTGTGTGTGTGTGTGTGTGTGTGTGTGT,AGTGTGTGTGTGTGTGTGTGTGTGTGTGTGTGT	PCTP,RPL37A	intergenic	ENSCAFG00000017369.4,ENSCAFG00000024313.2	.	1	0	1
30841972	AGTGTGTGTGTGTGTGTGTGTGTGTGTGTGTGTGTGT,AGTGTGTGTGTGTGTGTGTGTGTGTGTGTGTGTGTGTGT,AGTGTGTGTGTGTGTGTGTGTGTGTGTGTGTGTGT	PCTP,RPL37A	intergenic	ENSCAFG00000017369.4,ENSCAFG00000024313.2	.	3	0	3
30841972	AGTGTGTGTGTGTGTGTGTGTGTGTGTGTGTGTGTGT,AGTGTGTGTGTGTGTGTGTGTGTGTGTGTGTGTGTGTGTGTGTGT,AGTGTGTGTGTGTGTGTGTGTGTGTGTGTGTGTGTGTGT	PCTP,RPL37A	intergenic	ENSCAFG00000017369.4,ENSCAFG00000024313.2	.	1	0	1
30841972	AGTGTGTGTGTGTGTGTGTGTGTGTGTGTGTGTGTGT,AGTGTGTGTGTGTGTGTGTGTGTGTGTGTGTGTGTGTGTGTGTGT,AGTGTGTGTGTGTGTGTGTGTGTGTGTGTGTGTGTGTGTGTGT	PCTP,RPL37A	intergenic	ENSCAFG00000017369.4,ENSCAFG00000024313.2	.	1	0	1
30841972	AGTGTGTGTGTGTGTGTGTGTGTGTGTGTGTGTGTGT,AGTGTGTGTGTGTGTGTGTGTGTGTGTGTGTGTGTGTGTGTGTGT,AGTGTGTGTGTGTGTGTGTGTGTGTGTGTGTGTGTGTGTGTGTGTGTGT	PCTP,RPL37A	intergenic	ENSCAFG00000017369.4,ENSCAFG00000024313.2	.	0	1	-1
30841972	AGTGTGTGTGTGTGTGTGTGTGTGTGTGTGTGTGTGTGT,AGTGTGTGTGTGTGTGTGTGTGTGTGTGTGTGT,AGTGTGTGTGTGTGTGTGTGTGTGTGTGTGTGTGT	PCTP,RPL37A	intergenic	ENSCAFG00000017369.4,ENSCAFG00000024313.2	.	1	0	1
30841972	AGTGTGTGTGTGTGTGTGTGTGTGTGTGTGTGTGTGTGT,AGTGTGTGTGTGTGTGTGTGTGTGTGTGTGTGTGT,AGTGTGTGTGTGTGTGTGTGTGTGTGTGTGTGTGTGT	PCTP,RPL37A	intergenic	ENSCAFG00000017369.4,ENSCAFG00000024313.2	.	1	0	1
30841972	AGTGTGTGTGTGTGTGTGTGTGTGTGTGTGTGTGTGTGT,AGTGTGTGTGTGTGTGTGTGTGTGTGTGTGTGTGTGT	PCTP,RPL37A	intergenic	ENSCAFG00000017369.4,ENSCAFG00000024313.2	.	2	0	2
30841972	AGTGTGTGTGTGTGTGTGTGTGTGTGTGTGTGTGTGTGTGTGT	PCTP,RPL37A	intergenic	ENSCAFG00000017369.4,ENSCAFG00000024313.2	.	0	2	-2
30841972	AGTGTGTGTGTGTGTGTGTGTGTGTGTGTGTGTGTGTGTGTGT,AGTGTGTGTGTGTGTGTGTGTGTGTGTGTGTGTGTGT	PCTP,RPL37A	intergenic	ENSCAFG00000017369.4,ENSCAFG00000024313.2	.	0	1	-1
30841972	AGTGTGTGTGTGTGTGTGTGTGTGTGTGTGTGTGTGTGTGTGT,AGTGTGTGTGTGTGTGTGTGTGTGTGTGTGTGTGTGT,AGTGTGTGTGTGTGTGTGTGTGTGTGTGTGTGTGTGTGT	PCTP,RPL37A	intergenic	ENSCAFG00000017369.4,ENSCAFG00000024313.2	.	0	2	-2
30841972	AGTGTGTGTGTGTGTGTGTGTGTGTGTGTGTGTGTGTGTGTGT,AGTGTGTGTGTGTGTGTGTGTGTGTGTGTGTGTGTGTGTGTGTGT,AGTGTGTGTGTGTGTGTGTGTGTGTGTGTGTGTGTGTGTGTGTGTGT	PCTP,RPL37A	intergenic	ENSCAFG00000017369.4,ENSCAFG00000024313.2	.	0	1	-1
30841972	AGTGTGTGTGTGTGTGTGTGTGTGTGTGTGTGTGTGTGTGTGT,AGTGTGTGTGTGTGTGTGTGTGTGTGTGTGTGTGTGTGTGTGTGTGT,AGTGTGTGTGTGTGTGTGTGTGTGTGTGTGTGTGTGTGTGTGTGT	PCTP,RPL37A	intergenic	ENSCAFG00000017369.4,ENSCAFG00000024313.2	.	0	1	-1
30841972	AGTGTGTGTGTGTGTGTGTGTGTGTGTGTGTGTGTGTGTGTGT,AGTGTGTGTGTGTGTGTGTGTGTGTGTGTGTGTGTGTGTGTGTGTGT,AGTGTGTGTGTGTGTGTGTGTGTGTGTGTGTGTGTGTGTGTGTGTGTGT	PCTP,RPL37A	intergenic	ENSCAFG00000017369.4,ENSCAFG00000024313.2	.	0	1	-1
30841972	AGTGTGTGTGTGTGTGTGTGTGTGTGTGTGTGTGTGTGTGTGTGT,AGTGTGTGTGTGTGTGTGTGTGTGTGTGTGTGTGTGTGTGTGT	PCTP,RPL37A	intergenic	ENSCAFG00000017369.4,ENSCAFG00000024313.2	.	0	2	-2
30841972	AGTGTGTGTGTGTGTGTGTGTGTGTGTGTGTGTGTGTGTGTGTGT,AGTGTGTGTGTGTGTGTGTGTGTGTGTGTGTGTGTGTGTGTGTGTGT	PCTP,RPL37A	intergenic	ENSCAFG00000017369.4,ENSCAFG00000024313.2	.	0	1	-1
30841972	AGTGTGTGTGTGTGTGTGTGTGTGTGTGTGTGTGTGTGTGTGTGTGT,AGTGTGTGTGTGTGTGTGTGTGTGTGTGTGTGTGT,AGTGTGTGTGTGTGTGTGTGTGTGTGTGTGTGTGTGTGTGTGTGTGTGT	PCTP,RPL37A	intergenic	ENSCAFG00000017369.4,ENSCAFG00000024313.2	.	0	1	-1
30841972	AGTGTGTGTGTGTGTGTGTGTGTGTGTGTGTGTGTGTGTGTGTGTGT,AGTGTGTGTGTGTGTGTGTGTGTGTGTGTGTGTGTGT,AGTGTGTGTGTGTGTGTGTGTGTGTGTGTGTGTGTGTGTGTGTGTGTGT	PCTP,RPL37A	intergenic	ENSCAFG00000017369.4,ENSCAFG00000024313.2	.	0	1	-1
30841972	AGTGTGTGTGTGTGTGTGTGTGTGTGTGTGTGTGTGTGTGTGTGTGTGT,AGTGTGTGTGTGTGTGTGTGTGTGTGTGTGTGTGTGTGTGTGTGTGT,AGTGTGTGTGTGTGTGTGTGTGTGTGTGTGTGTGTGTGTGTGT	PCTP,RPL37A	intergenic	ENSCAFG00000017369.4,ENSCAFG00000024313.2	.	0	1	-1
30841976	TGTGGGCGTG	PCTP,RPL37A	intergenic	ENSCAFG00000017369.4,ENSCAFG00000024313.2	.	0	1	-1
30841987	G	PCTP,RPL37A	intergenic	ENSCAFG00000017369.4,ENSCAFG00000024313.2	.	1	0	1
30841992	TGTGTGCGTGTG	PCTP,RPL37A	intergenic	ENSCAFG00000017369.4,ENSCAFG00000024313.2	.	0	1	-1
30842002	TGTGGGTG	PCTP,RPL37A	intergenic	ENSCAFG00000017369.4,ENSCAFG00000024313.2	.	0	1	-1
30842009	GT	PCTP,RPL37A	intergenic	ENSCAFG00000017369.4,ENSCAFG00000024313.2	.	1	0	1
30842011	GTGTGTTT	PCTP,RPL37A	intergenic	ENSCAFG00000017369.4,ENSCAFG00000024313.2	.	0	2	-2
30842078	T	PCTP,RPL37A	intergenic	ENSCAFG00000017369.4,ENSCAFG00000024313.2	.	0	14	-14
30842139	G	PCTP,RPL37A	intergenic	ENSCAFG00000017369.4,ENSCAFG00000024313.2	.	0	12	-12
30842139	G,T	PCTP,RPL37A	intergenic	ENSCAFG00000017369.4,ENSCAFG00000024313.2	.	0	1	-1
30842340	T	PCTP,RPL37A	intergenic	ENSCAFG00000017369.4,ENSCAFG00000024313.2	.	2	21	-19
30842368	G	PCTP,RPL37A	intergenic	ENSCAFG00000017369.4,ENSCAFG00000024313.2	.	0	14	-14
30842371	T	PCTP,RPL37A	intergenic	ENSCAFG00000017369.4,ENSCAFG00000024313.2	.	0	14	-14
30842372	G	PCTP,RPL37A	intergenic	ENSCAFG00000017369.4,ENSCAFG00000024313.2	.	0	14	-14
30842385	T	PCTP,RPL37A	intergenic	ENSCAFG00000017369.4,ENSCAFG00000024313.2	.	0	14	-14
30842397	C	PCTP,RPL37A	intergenic	ENSCAFG00000017369.4,ENSCAFG00000024313.2	.	0	14	-14
30842404	C	PCTP,RPL37A	intergenic	ENSCAFG00000017369.4,ENSCAFG00000024313.2	.	0	14	-14
30842629	C	PCTP,RPL37A	intergenic	ENSCAFG00000017369.4,ENSCAFG00000024313.2	.	0	14	-14
30842685	T	PCTP,RPL37A	intergenic	ENSCAFG00000017369.4,ENSCAFG00000024313.2	.	0	14	-14
30842776	A	PCTP,RPL37A	intergenic	ENSCAFG00000017369.4,ENSCAFG00000024313.2	.	0	14	-14
30843046	C	PCTP,RPL37A	intergenic	ENSCAFG00000017369.4,ENSCAFG00000024313.2	.	0	14	-14
30843136	C	PCTP,RPL37A	intergenic	ENSCAFG00000017369.4,ENSCAFG00000024313.2	.	0	14	-14
30843137	A	PCTP,RPL37A	intergenic	ENSCAFG00000017369.4,ENSCAFG00000024313.2	.	0	14	-14
30843264	T	PCTP,RPL37A	intergenic	ENSCAFG00000017369.4,ENSCAFG00000024313.2	.	0	14	-14
30843358	G	PCTP,RPL37A	intergenic	ENSCAFG00000017369.4,ENSCAFG00000024313.2	.	0	14	-14
30844012	A	PCTP,RPL37A	intergenic	ENSCAFG00000017369.4,ENSCAFG00000024313.2	.	0	13	-13
30844194	A	PCTP,RPL37A	intergenic	ENSCAFG00000017369.4,ENSCAFG00000024313.2	.	0	12	-12
30844263	C	PCTP,RPL37A	intergenic	ENSCAFG00000017369.4,ENSCAFG00000024313.2	.	0	10	-10
30844269	T	PCTP,RPL37A	intergenic	ENSCAFG00000017369.4,ENSCAFG00000024313.2	.	0	11	-11
30844363	T	PCTP,RPL37A	intergenic	ENSCAFG00000017369.4,ENSCAFG00000024313.2	.	0	1	-1
30844506	CCTCTCTCTCTCTCTCTCT	PCTP,RPL37A	intergenic	ENSCAFG00000017369.4,ENSCAFG00000024313.2	.	2	0	2
30844506	CCTCTCTCTCTCTCTCTCTCT	PCTP,RPL37A	intergenic	ENSCAFG00000017369.4,ENSCAFG00000024313.2	.	4	0	4
30844506	CCTCTCTCTCTCTCTCTCTCT,CCTCTCTCTCTCTCTCTCTCTCTCT	PCTP,RPL37A	intergenic	ENSCAFG00000017369.4,ENSCAFG00000024313.2	.	0	1	-1
30844506	CCTCTCTCTCTCTCTCTCTCTCTCT	PCTP,RPL37A	intergenic	ENSCAFG00000017369.4,ENSCAFG00000024313.2	.	0	6	-6
30844506	CCTCTCTCTCTCTCTCTCTCTCTCT,CCCCTCTCTCTCTCTCTCTCTCTCTCT		.	.	.	0	1	-1
30844506	CCTCTCTCTCTCTCTCTCTCTCTCT,CCTCTCTCTCTCTCTCTCTCTCTCTCT	PCTP,RPL37A	intergenic	ENSCAFG00000017369.4,ENSCAFG00000024313.2	.	0	2	-2
30844506	CCTCTCTCTCTCTCTCTCTCTCTCTCT,CCTCTCTCTCTCTCTCTCTCT	PCTP,RPL37A	intergenic	ENSCAFG00000017369.4,ENSCAFG00000024313.2	.	0	1	-1
30844506	CCTCTCTCTCTCTCTCTCTCTCTCTCT,CCTCTCTCTCTCTCTCTCTCTCTCT	PCTP,RPL37A	intergenic	ENSCAFG00000017369.4,ENSCAFG00000024313.2	.	0	4	-4
30844506	CCTCTCTCTCTCTCTCTCTCTCTCTCT,CCTCTCTCTCTCTCTCTCTCTCTCTCTCT,CCTCTCTCTCTCTCTCTCTCTCTCT	PCTP,RPL37A	intergenic	ENSCAFG00000017369.4,ENSCAFG00000024313.2	.	0	1	-1
30844562	TAA	PCTP,RPL37A	intergenic	ENSCAFG00000017369.4,ENSCAFG00000024313.2	.	0	1	-1
30844562	TAAAAAAAAAAAA,TAAAAAAAAAAAAA,TAAAAAAAAAAA	PCTP,RPL37A	intergenic	ENSCAFG00000017369.4,ENSCAFG00000024313.2	.	0	1	-1
30844703	A	PCTP,RPL37A	intergenic	ENSCAFG00000017369.4,ENSCAFG00000024313.2	.	0	13	-13
30845983	G	PCTP,RPL37A	intergenic	ENSCAFG00000017369.4,ENSCAFG00000024313.2	.	0	14	-14
30846539	T	PCTP,RPL37A	intergenic	ENSCAFG00000017369.4,ENSCAFG00000024313.2	.	1	0	1
30847081	C	PCTP,RPL37A	intergenic	ENSCAFG00000017369.4,ENSCAFG00000024313.2	.	2	20	-18
30847133	A	PCTP,RPL37A	intergenic	ENSCAFG00000017369.4,ENSCAFG00000024313.2	.	2	2	0
30847133	AGGGGG	PCTP,RPL37A	intergenic	ENSCAFG00000017369.4,ENSCAFG00000024313.2	.	0	22	-22
30847215	T	PCTP,RPL37A	intergenic	ENSCAFG00000017369.4,ENSCAFG00000024313.2	.	0	14	-14
30847376	C	PCTP,RPL37A	intergenic	ENSCAFG00000017369.4,ENSCAFG00000024313.2	.	0	14	-14
30848481	G	PCTP,RPL37A	intergenic	ENSCAFG00000017369.4,ENSCAFG00000024313.2	.	2	3	-1
30849904	T	PCTP,RPL37A	intergenic	ENSCAFG00000017369.4,ENSCAFG00000024313.2	.	0	13	-13
30850489	CGGGATCCCTGGGTGGCGCAGCGGTTTGGCGCCTGCCTTTGGCCCAGGGCGCGATCCTGGAGACCCGGGA	PCTP,RPL37A	intergenic	ENSCAFG00000017369.4,ENSCAFG00000024313.2	.	0	1	-1
30851982	A	PCTP,RPL37A	intergenic	ENSCAFG00000017369.4,ENSCAFG00000024313.2	.	0	1	-1
30852302	C	PCTP,RPL37A	intergenic	ENSCAFG00000017369.4,ENSCAFG00000024313.2	.	24	24	0
30852464	G	PCTP,RPL37A	intergenic	ENSCAFG00000017369.4,ENSCAFG00000024313.2	.	2	18	-16
30852603	C	PCTP,RPL37A	intergenic	ENSCAFG00000017369.4,ENSCAFG00000024313.2	.	24	24	0
30852642	T	PCTP,RPL37A	intergenic	ENSCAFG00000017369.4,ENSCAFG00000024313.2	.	24	24	0
30852691	G	PCTP,RPL37A	intergenic	ENSCAFG00000017369.4,ENSCAFG00000024313.2	.	24	24	0
30852709	C	PCTP,RPL37A	intergenic	ENSCAFG00000017369.4,ENSCAFG00000024313.2	.	24	24	0
30852720	A	PCTP,RPL37A	intergenic	ENSCAFG00000017369.4,ENSCAFG00000024313.2	.	24	24	0
30852769	CCA	PCTP,RPL37A	intergenic	ENSCAFG00000017369.4,ENSCAFG00000024313.2	.	24	24	0
30852868	G	PCTP,RPL37A	intergenic	ENSCAFG00000017369.4,ENSCAFG00000024313.2	.	24	24	0
30852910	C	PCTP,RPL37A	intergenic	ENSCAFG00000017369.4,ENSCAFG00000024313.2	.	24	24	0
30854792	C	PCTP,RPL37A	intergenic	ENSCAFG00000017369.4,ENSCAFG00000024313.2	.	0	14	-14
30854794	C	PCTP,RPL37A	intergenic	ENSCAFG00000017369.4,ENSCAFG00000024313.2	.	0	14	-14
30855928	C	PCTP,RPL37A	intergenic	ENSCAFG00000017369.4,ENSCAFG00000024313.2	.	0	1	-1
30856430	A	PCTP,RPL37A	intergenic	ENSCAFG00000017369.4,ENSCAFG00000024313.2	.	4	2	2
30857197	G	PCTP,RPL37A	intergenic	ENSCAFG00000017369.4,ENSCAFG00000024313.2	.	2	21	-19
30857735	TAG	PCTP,RPL37A	intergenic	ENSCAFG00000017369.4,ENSCAFG00000024313.2	.	3	2	1
30857763	G	PCTP,RPL37A	intergenic	ENSCAFG00000017369.4,ENSCAFG00000024313.2	.	5	4	1
30857953	A	PCTP,RPL37A	intergenic	ENSCAFG00000017369.4,ENSCAFG00000024313.2	.	24	24	0
30858230	TG	PCTP,RPL37A	intergenic	ENSCAFG00000017369.4,ENSCAFG00000024313.2	.	24	22	2
30858491	C	PCTP,RPL37A	intergenic	ENSCAFG00000017369.4,ENSCAFG00000024313.2	.	16	15	1
30859647	ATGTGTGTGTGTGTGTGTGT	PCTP,RPL37A	intergenic	ENSCAFG00000017369.4,ENSCAFG00000024313.2	.	6	4	2
30861898	T	PCTP,RPL37A	intergenic	ENSCAFG00000017369.4,ENSCAFG00000024313.2	.	2	21	-19
30862144	C	PCTP,RPL37A	intergenic	ENSCAFG00000017369.4,ENSCAFG00000024313.2	.	2	21	-19
30862305	G	PCTP,RPL37A	intergenic	ENSCAFG00000017369.4,ENSCAFG00000024313.2	.	2	21	-19
30862882	C	PCTP,RPL37A	intergenic	ENSCAFG00000017369.4,ENSCAFG00000024313.2	.	2	21	-19
30863381	T	PCTP,RPL37A	intergenic	ENSCAFG00000017369.4,ENSCAFG00000024313.2	.	1	14	-13
30863432	C	PCTP,RPL37A	intergenic	ENSCAFG00000017369.4,ENSCAFG00000024313.2	.	1	0	1
30863432	CCTCTCTCTCTCT	PCTP,RPL37A	intergenic	ENSCAFG00000017369.4,ENSCAFG00000024313.2	.	1	0	1
30863432	CCTCTCTCTCTCTCT	PCTP,RPL37A	intergenic	ENSCAFG00000017369.4,ENSCAFG00000024313.2	.	2	1	1
30863432	CCTCTCTCTCTCTCTCTCT	PCTP,RPL37A	intergenic	ENSCAFG00000017369.4,ENSCAFG00000024313.2	.	2	11	-9
30863432	CCTCTCTCTCTCTCTCTCT,CCTCTCTCTCTCT,CCTCTCTCTCTCTCT	PCTP,RPL37A	intergenic	ENSCAFG00000017369.4,ENSCAFG00000024313.2	.	0	1	-1
30863432	CCTCTCTCTCTCTCTCTCT,CCTCTCTCTCTCTCT	PCTP,RPL37A	intergenic	ENSCAFG00000017369.4,ENSCAFG00000024313.2	.	0	1	-1
30863432	CCTCTCTCTCTCTCTCTCT,CCTCTCTCTCTCTCTCTCTCTCTCT	PCTP,RPL37A	intergenic	ENSCAFG00000017369.4,ENSCAFG00000024313.2	.	0	1	-1
30864700	G	PCTP,RPL37A	intergenic	ENSCAFG00000017369.4,ENSCAFG00000024313.2	.	2	20	-18
30865576	A	PCTP,RPL37A	intergenic	ENSCAFG00000017369.4,ENSCAFG00000024313.2	.	2	21	-19
30865788	T	PCTP,RPL37A	intergenic	ENSCAFG00000017369.4,ENSCAFG00000024313.2	.	2	21	-19
30867165	A	PCTP,RPL37A	intergenic	ENSCAFG00000017369.4,ENSCAFG00000024313.2	.	24	24	0
30867484	ATGTATGTGTGTGTGTGTGTGT	PCTP,RPL37A	intergenic	ENSCAFG00000017369.4,ENSCAFG00000024313.2	.	0	1	-1
30867488	G	PCTP,RPL37A	intergenic	ENSCAFG00000017369.4,ENSCAFG00000024313.2	.	0	5	-5
30867488	GTGTGTGT	PCTP,RPL37A	intergenic	ENSCAFG00000017369.4,ENSCAFG00000024313.2	.	0	6	-6
30867490	G	PCTP,RPL37A	intergenic	ENSCAFG00000017369.4,ENSCAFG00000024313.2	.	0	5	-5
30867490	GTGTGT	PCTP,RPL37A	intergenic	ENSCAFG00000017369.4,ENSCAFG00000024313.2	.	2	12	-10
30867496	ATGTGTGTGTGTGTGT	PCTP,RPL37A	intergenic	ENSCAFG00000017369.4,ENSCAFG00000024313.2	.	3	1	2
30867907	C	PCTP,RPL37A	intergenic	ENSCAFG00000017369.4,ENSCAFG00000024313.2	.	2	21	-19
30868171	G	PCTP,RPL37A	intergenic	ENSCAFG00000017369.4,ENSCAFG00000024313.2	.	2	21	-19
30869740	G	PCTP,RPL37A	intergenic	ENSCAFG00000017369.4,ENSCAFG00000024313.2	.	2	24	-22
30870150	A	PCTP,RPL37A	intergenic	ENSCAFG00000017369.4,ENSCAFG00000024313.2	.	2	24	-22
30870555	A	PCTP,RPL37A	intergenic	ENSCAFG00000017369.4,ENSCAFG00000024313.2	.	0	1	-1
30870606	TCTC	PCTP,RPL37A	intergenic	ENSCAFG00000017369.4,ENSCAFG00000024313.2	.	0	1	-1
30870610	GCTCTCTCTCTCTCT	PCTP,RPL37A	intergenic	ENSCAFG00000017369.4,ENSCAFG00000024313.2	.	2	0	2
30870610	GCTCTCTCTCTCTCTCT	PCTP,RPL37A	intergenic	ENSCAFG00000017369.4,ENSCAFG00000024313.2	.	5	1	4
30870610	T	PCTP,RPL37A	intergenic	ENSCAFG00000017369.4,ENSCAFG00000024313.2	.	0	1	-1
30870655	CT	PCTP,RPL37A	intergenic	ENSCAFG00000017369.4,ENSCAFG00000024313.2	.	2	0	2
30870655	CTTTTTTTTTTTT,CTTTTTTTTTTT	PCTP,RPL37A	intergenic	ENSCAFG00000017369.4,ENSCAFG00000024313.2	.	0	1	-1
30870777	AC	PCTP,RPL37A	intergenic	ENSCAFG00000017369.4,ENSCAFG00000024313.2	.	0	12	-12
30871104	T	PCTP,RPL37A	intergenic	ENSCAFG00000017369.4,ENSCAFG00000024313.2	.	0	14	-14
30871643	A	PCTP,RPL37A	intergenic	ENSCAFG00000017369.4,ENSCAFG00000024313.2	.	0	14	-14
30872049	A	PCTP,RPL37A	intergenic	ENSCAFG00000017369.4,ENSCAFG00000024313.2	.	24	20	4
30873436	T	PCTP,RPL37A	intergenic	ENSCAFG00000017369.4,ENSCAFG00000024313.2	.	24	24	0
30874128	TTTTATTTATTTATTTATTT	PCTP,RPL37A	intergenic	ENSCAFG00000017369.4,ENSCAFG00000024313.2	.	19	21	-2
30874128	TTTTATTTATTTATTTATTT,TTTTATTTATTTATTT	PCTP,RPL37A	intergenic	ENSCAFG00000017369.4,ENSCAFG00000024313.2	.	2	0	2
30874148	G	PCTP,RPL37A	intergenic	ENSCAFG00000017369.4,ENSCAFG00000024313.2	.	1	0	1
30874173	T	PCTP,RPL37A	intergenic	ENSCAFG00000017369.4,ENSCAFG00000024313.2	.	19	20	-1
30874506	C	PCTP,RPL37A	intergenic	ENSCAFG00000017369.4,ENSCAFG00000024313.2	.	16	15	1
30875040	ATTTTTTTT	PCTP,RPL37A	intergenic	ENSCAFG00000017369.4,ENSCAFG00000024313.2	.	1	2	-1
30883383	ATCTCTCTCTCTCTCTCTC	PCTP,RPL37A	intergenic	ENSCAFG00000017369.4,ENSCAFG00000024313.2	.	1	0	1
30884828	CTTT	PCTP,RPL37A	intergenic	ENSCAFG00000017369.4,ENSCAFG00000024313.2	.	9	9	0
30885275	GT	PCTP,RPL37A	intergenic	ENSCAFG00000017369.4,ENSCAFG00000024313.2	.	1	0	1
30885277	G	PCTP,RPL37A	intergenic	ENSCAFG00000017369.4,ENSCAFG00000024313.2	.	1	0	1
30885277	GTTTTTTTTTTT,GTTTTTTTTTT	PCTP,RPL37A	intergenic	ENSCAFG00000017369.4,ENSCAFG00000024313.2	.	1	0	1
30885277	GTTTTTTTTTTT,GTTTTTTTTTT,GTTTTTTTTTTTT	PCTP,RPL37A	intergenic	ENSCAFG00000017369.4,ENSCAFG00000024313.2	.	1	1	0
30885277	GTTTTTTTTTTT,GTTTTTTTTTT,GTTTTTTTTTTTTT	PCTP,RPL37A	intergenic	ENSCAFG00000017369.4,ENSCAFG00000024313.2	.	1	0	1
30885277	GTTTTTTTTTTT,GTTTTTTTTTTTT	PCTP,RPL37A	intergenic	ENSCAFG00000017369.4,ENSCAFG00000024313.2	.	2	2	0
30885629	A	PCTP,RPL37A	intergenic	ENSCAFG00000017369.4,ENSCAFG00000024313.2	.	0	3	-3
30885830	T	PCTP,RPL37A	intergenic	ENSCAFG00000017369.4,ENSCAFG00000024313.2	.	21	21	0
30885830	T,G	PCTP,RPL37A	intergenic	ENSCAFG00000017369.4,ENSCAFG00000024313.2	.	0	1	-1
30885887	C	PCTP,RPL37A	intergenic	ENSCAFG00000017369.4,ENSCAFG00000024313.2	.	23	22	1
30885887	C,A	PCTP,RPL37A	intergenic	ENSCAFG00000017369.4,ENSCAFG00000024313.2	.	0	1	-1
30886017	A	PCTP,RPL37A	intergenic	ENSCAFG00000017369.4,ENSCAFG00000024313.2	.	24	23	1
30886161	A	PCTP,RPL37A	intergenic	ENSCAFG00000017369.4,ENSCAFG00000024313.2	.	24	19	5
30886161	A,G	PCTP,RPL37A	intergenic	ENSCAFG00000017369.4,ENSCAFG00000024313.2	.	0	1	-1
30886212	TTAA	PCTP,RPL37A	intergenic	ENSCAFG00000017369.4,ENSCAFG00000024313.2	.	2	1	1
30886212	TTAATAAT	PCTP,RPL37A	intergenic	ENSCAFG00000017369.4,ENSCAFG00000024313.2	.	22	22	0
30886213	TAAAAA	PCTP,RPL37A	intergenic	ENSCAFG00000017369.4,ENSCAFG00000024313.2	.	1	0	1
30886214	AATCAT	PCTP,RPL37A	intergenic	ENSCAFG00000017369.4,ENSCAFG00000024313.2	.	0	2	-2
30886215	ATACT	PCTP,RPL37A	intergenic	ENSCAFG00000017369.4,ENSCAFG00000024313.2	.	1	0	1
30886313	G	PCTP,RPL37A	intergenic	ENSCAFG00000017369.4,ENSCAFG00000024313.2	.	24	24	0
30886326	A	PCTP,RPL37A	intergenic	ENSCAFG00000017369.4,ENSCAFG00000024313.2	.	0	13	-13
30886335	A	PCTP,RPL37A	intergenic	ENSCAFG00000017369.4,ENSCAFG00000024313.2	.	0	13	-13
30886361	ACCT	PCTP,RPL37A	intergenic	ENSCAFG00000017369.4,ENSCAFG00000024313.2	.	0	12	-12
30886362	T	PCTP,RPL37A	intergenic	ENSCAFG00000017369.4,ENSCAFG00000024313.2	.	0	12	-12
30886605	T	PCTP,RPL37A	intergenic	ENSCAFG00000017369.4,ENSCAFG00000024313.2	.	0	14	-14
30886723	A	PCTP,RPL37A	intergenic	ENSCAFG00000017369.4,ENSCAFG00000024313.2	.	0	14	-14
30886793	A	PCTP,RPL37A	intergenic	ENSCAFG00000017369.4,ENSCAFG00000024313.2	.	0	13	-13
30886847	G	PCTP,RPL37A	intergenic	ENSCAFG00000017369.4,ENSCAFG00000024313.2	.	24	22	2
30886847	G,T	PCTP,RPL37A	intergenic	ENSCAFG00000017369.4,ENSCAFG00000024313.2	.	0	2	-2
30887103	AA	PCTP,RPL37A	intergenic	ENSCAFG00000017369.4,ENSCAFG00000024313.2	.	0	14	-14
30887274	G	PCTP,RPL37A	intergenic	ENSCAFG00000017369.4,ENSCAFG00000024313.2	.	20	21	-1
30887274	G,C	PCTP,RPL37A	intergenic	ENSCAFG00000017369.4,ENSCAFG00000024313.2	.	1	0	1
30887368	A	PCTP,RPL37A	intergenic	ENSCAFG00000017369.4,ENSCAFG00000024313.2	.	0	4	-4
30887368	A,C	PCTP,RPL37A	intergenic	ENSCAFG00000017369.4,ENSCAFG00000024313.2	.	0	1	-1
30888757	A	PCTP,RPL37A	intergenic	ENSCAFG00000017369.4,ENSCAFG00000024313.2	.	0	14	-14
30888988	C	PCTP,RPL37A	intergenic	ENSCAFG00000017369.4,ENSCAFG00000024313.2	.	0	1	-1
30888989	A	PCTP,RPL37A	intergenic	ENSCAFG00000017369.4,ENSCAFG00000024313.2	.	1	0	1
30888989	A,ATT	PCTP,RPL37A	intergenic	ENSCAFG00000017369.4,ENSCAFG00000024313.2	.	1	0	1
30888990	C	PCTP,RPL37A	intergenic	ENSCAFG00000017369.4,ENSCAFG00000024313.2	.	1	2	-1
30888990	CTTTTTTTTTTTTTT,CTTTTTTTTTTTTTTTTT,CTTTTTTTTTTTTTTT	PCTP,RPL37A	intergenic	ENSCAFG00000017369.4,ENSCAFG00000024313.2	.	0	1	-1
30888990	CTTTTTTTTTTTTTTT,CTTTTTTTTTTTTTTTTT,CTTTTTTTTTTTTTTTT	PCTP,RPL37A	intergenic	ENSCAFG00000017369.4,ENSCAFG00000024313.2	.	0	1	-1
30888990	CTTTTTTTTTTTTTTT,CTTTTTTTTTTTTTTTTT,CTTTTTTTTTTTTTTTTTT	PCTP,RPL37A	intergenic	ENSCAFG00000017369.4,ENSCAFG00000024313.2	.	0	1	-1
30888990	CTTTTTTTTTTTTTTTT,CTTTTTTTTTTTTTT,CTTTTTTTTTTTTTTTTT	PCTP,RPL37A	intergenic	ENSCAFG00000017369.4,ENSCAFG00000024313.2	.	0	1	-1
30888990	CTTTTTTTTTTTTTTTTT,CTTTTTTTTTTTTTT,CTTTTTTTTTTTTTTTT	PCTP,RPL37A	intergenic	ENSCAFG00000017369.4,ENSCAFG00000024313.2	.	1	0	1
30889006	T	PCTP,RPL37A	intergenic	ENSCAFG00000017369.4,ENSCAFG00000024313.2	.	0	1	-1
30889007	T	PCTP,RPL37A	intergenic	ENSCAFG00000017369.4,ENSCAFG00000024313.2	.	1	0	1
30889823	T	PCTP,RPL37A	intergenic	ENSCAFG00000017369.4,ENSCAFG00000024313.2	.	0	7	-7
30889823	T,A	PCTP,RPL37A	intergenic	ENSCAFG00000017369.4,ENSCAFG00000024313.2	.	0	2	-2
30890780	AATTTTATTTTATTTT	PCTP,RPL37A	intergenic	ENSCAFG00000017369.4,ENSCAFG00000024313.2	.	0	10	-10
30890920	T	PCTP,RPL37A	intergenic	ENSCAFG00000017369.4,ENSCAFG00000024313.2	.	6	12	-6
30891163	TTTTATTTATTTATTTATTT	PCTP,RPL37A	intergenic	ENSCAFG00000017369.4,ENSCAFG00000024313.2	.	0	6	-6
30891167	ATTTCTTT	PCTP,RPL37A	intergenic	ENSCAFG00000017369.4,ENSCAFG00000024313.2	.	0	1	-1
30891178	TA	PCTP,RPL37A	intergenic	ENSCAFG00000017369.4,ENSCAFG00000024313.2	.	0	3	-3
30891179	A	PCTP,RPL37A	intergenic	ENSCAFG00000017369.4,ENSCAFG00000024313.2	.	5	10	-5
30892647	G	PCTP,RPL37A	intergenic	ENSCAFG00000017369.4,ENSCAFG00000024313.2	.	24	21	3
30893631	GCCCTCCAGTTCCTTTCTA	PCTP,RPL37A	intergenic	ENSCAFG00000017369.4,ENSCAFG00000024313.2	.	1	1	0
30893633	TAG	PCTP,RPL37A	intergenic	ENSCAFG00000017369.4,ENSCAFG00000024313.2	.	0	1	-1
30893779	G	PCTP,RPL37A	intergenic	ENSCAFG00000017369.4,ENSCAFG00000024313.2	.	0	14	-14
30893812	GT	PCTP,RPL37A	intergenic	ENSCAFG00000017369.4,ENSCAFG00000024313.2	.	24	24	0
30893820	CA	PCTP,RPL37A	intergenic	ENSCAFG00000017369.4,ENSCAFG00000024313.2	.	24	23	1
30893951	T	PCTP,RPL37A	intergenic	ENSCAFG00000017369.4,ENSCAFG00000024313.2	.	0	13	-13
30894209	GT	PCTP,RPL37A	intergenic	ENSCAFG00000017369.4,ENSCAFG00000024313.2	.	0	4	-4
30894209	GTTTTTTTTT	PCTP,RPL37A	intergenic	ENSCAFG00000017369.4,ENSCAFG00000024313.2	.	10	2	8
30894209	GTTTTTTTTT,GTTTTTTTTTT	PCTP,RPL37A	intergenic	ENSCAFG00000017369.4,ENSCAFG00000024313.2	.	4	0	4
30894265	T	PCTP,RPL37A	intergenic	ENSCAFG00000017369.4,ENSCAFG00000024313.2	.	24	20	4
30894308	G	PCTP,RPL37A	intergenic	ENSCAFG00000017369.4,ENSCAFG00000024313.2	.	24	21	3
30894359	T	PCTP,RPL37A	intergenic	ENSCAFG00000017369.4,ENSCAFG00000024313.2	.	24	21	3
30894675	G	PCTP,RPL37A	intergenic	ENSCAFG00000017369.4,ENSCAFG00000024313.2	.	0	14	-14
30894689	T	PCTP,RPL37A	intergenic	ENSCAFG00000017369.4,ENSCAFG00000024313.2	.	0	14	-14
30894978	G	PCTP,RPL37A	intergenic	ENSCAFG00000017369.4,ENSCAFG00000024313.2	.	0	14	-14
30895158	CT	PCTP,RPL37A	intergenic	ENSCAFG00000017369.4,ENSCAFG00000024313.2	.	0	2	-2
30895158	CTTTT	PCTP,RPL37A	intergenic	ENSCAFG00000017369.4,ENSCAFG00000024313.2	.	0	9	-9
30895158	CTTTT,CTTTTT	PCTP,RPL37A	intergenic	ENSCAFG00000017369.4,ENSCAFG00000024313.2	.	0	2	-2
30895158	CTTTT,CTTTTTT,CTTTTT	PCTP,RPL37A	intergenic	ENSCAFG00000017369.4,ENSCAFG00000024313.2	.	0	1	-1
30895162	T	PCTP,RPL37A	intergenic	ENSCAFG00000017369.4,ENSCAFG00000024313.2	.	0	14	-14
30895413	G	PCTP,RPL37A	intergenic	ENSCAFG00000017369.4,ENSCAFG00000024313.2	.	0	14	-14
30895566	T	PCTP,RPL37A	intergenic	ENSCAFG00000017369.4,ENSCAFG00000024313.2	.	0	14	-14
30895620	T	PCTP,RPL37A	intergenic	ENSCAFG00000017369.4,ENSCAFG00000024313.2	.	0	14	-14
30895654	G	PCTP,RPL37A	intergenic	ENSCAFG00000017369.4,ENSCAFG00000024313.2	.	0	14	-14
30895743	G	PCTP,RPL37A	intergenic	ENSCAFG00000017369.4,ENSCAFG00000024313.2	.	0	14	-14
30895752	GC	PCTP,RPL37A	intergenic	ENSCAFG00000017369.4,ENSCAFG00000024313.2	.	0	14	-14
30895844	C	PCTP,RPL37A	intergenic	ENSCAFG00000017369.4,ENSCAFG00000024313.2	.	0	14	-14
30896419	A	PCTP,RPL37A	intergenic	ENSCAFG00000017369.4,ENSCAFG00000024313.2	.	0	12	-12
30896424	G	PCTP,RPL37A	intergenic	ENSCAFG00000017369.4,ENSCAFG00000024313.2	.	0	10	-10
30896472	ATGTGTGTGTGTGTGTGT	PCTP,RPL37A	intergenic	ENSCAFG00000017369.4,ENSCAFG00000024313.2	.	0	13	-13
30896529	C	PCTP,RPL37A	intergenic	ENSCAFG00000017369.4,ENSCAFG00000024313.2	.	0	14	-14
30896574	G	PCTP,RPL37A	intergenic	ENSCAFG00000017369.4,ENSCAFG00000024313.2	.	0	14	-14
30896836	G	PCTP,RPL37A	intergenic	ENSCAFG00000017369.4,ENSCAFG00000024313.2	.	0	14	-14
30896929	A	PCTP,RPL37A	intergenic	ENSCAFG00000017369.4,ENSCAFG00000024313.2	.	0	13	-13
30897171	CT	PCTP,RPL37A	intergenic	ENSCAFG00000017369.4,ENSCAFG00000024313.2	.	0	5	-5
30897171	CTTTTTTTT	PCTP,RPL37A	intergenic	ENSCAFG00000017369.4,ENSCAFG00000024313.2	.	0	2	-2
30897259	A	PCTP,RPL37A	intergenic	ENSCAFG00000017369.4,ENSCAFG00000024313.2	.	0	11	-11
30897277	A	PCTP,RPL37A	intergenic	ENSCAFG00000017369.4,ENSCAFG00000024313.2	.	0	11	-11
30897346	A	PCTP,RPL37A	intergenic	ENSCAFG00000017369.4,ENSCAFG00000024313.2	.	0	12	-12
30897619	T	PCTP,RPL37A	intergenic	ENSCAFG00000017369.4,ENSCAFG00000024313.2	.	0	13	-13
30897839	C	PCTP,RPL37A	intergenic	ENSCAFG00000017369.4,ENSCAFG00000024313.2	.	0	14	-14
30897849	A	PCTP,RPL37A	intergenic	ENSCAFG00000017369.4,ENSCAFG00000024313.2	.	0	1	-1
30897851	CC	PCTP,RPL37A	intergenic	ENSCAFG00000017369.4,ENSCAFG00000024313.2	.	0	14	-14
30897960	A	PCTP,RPL37A	intergenic	ENSCAFG00000017369.4,ENSCAFG00000024313.2	.	0	14	-14
30897993	A	PCTP,RPL37A	intergenic	ENSCAFG00000017369.4,ENSCAFG00000024313.2	.	0	13	-13
30898165	A	PCTP,RPL37A	intergenic	ENSCAFG00000017369.4,ENSCAFG00000024313.2	.	0	14	-14
30898253	A	PCTP,RPL37A	intergenic	ENSCAFG00000017369.4,ENSCAFG00000024313.2	.	0	14	-14
30898435	T	PCTP,RPL37A	intergenic	ENSCAFG00000017369.4,ENSCAFG00000024313.2	.	0	14	-14
30898465	TA	PCTP,RPL37A	intergenic	ENSCAFG00000017369.4,ENSCAFG00000024313.2	.	0	1	-1
30898465	TAAAA	PCTP,RPL37A	intergenic	ENSCAFG00000017369.4,ENSCAFG00000024313.2	.	0	12	-12
30898589	C	PCTP,RPL37A	intergenic	ENSCAFG00000017369.4,ENSCAFG00000024313.2	.	0	12	-12
30898743	T	PCTP,RPL37A	intergenic	ENSCAFG00000017369.4,ENSCAFG00000024313.2	.	0	14	-14
30898884	T	PCTP,RPL37A	intergenic	ENSCAFG00000017369.4,ENSCAFG00000024313.2	.	0	14	-14
30898887	G	PCTP,RPL37A	intergenic	ENSCAFG00000017369.4,ENSCAFG00000024313.2	.	0	14	-14
30898947	TTGTCCTGT	PCTP,RPL37A	intergenic	ENSCAFG00000017369.4,ENSCAFG00000024313.2	.	0	14	-14
30899171	C	PCTP,RPL37A	intergenic	ENSCAFG00000017369.4,ENSCAFG00000024313.2	.	0	14	-14
30899217	T	PCTP,RPL37A	intergenic	ENSCAFG00000017369.4,ENSCAFG00000024313.2	.	0	14	-14
30899275	C	PCTP,RPL37A	intergenic	ENSCAFG00000017369.4,ENSCAFG00000024313.2	.	24	24	0
30899345	G	PCTP,RPL37A	intergenic	ENSCAFG00000017369.4,ENSCAFG00000024313.2	.	0	14	-14
30899610	T	PCTP,RPL37A	intergenic	ENSCAFG00000017369.4,ENSCAFG00000024313.2	.	0	14	-14
30899742	G	PCTP,RPL37A	intergenic	ENSCAFG00000017369.4,ENSCAFG00000024313.2	.	24	23	1
30899742	G,T	PCTP,RPL37A	intergenic	ENSCAFG00000017369.4,ENSCAFG00000024313.2	.	0	1	-1
30900156	A	PCTP,RPL37A	intergenic	ENSCAFG00000017369.4,ENSCAFG00000024313.2	.	0	14	-14
30900187	G	PCTP,RPL37A	intergenic	ENSCAFG00000017369.4,ENSCAFG00000024313.2	.	0	14	-14
30900815	C	PCTP,RPL37A	intergenic	ENSCAFG00000017369.4,ENSCAFG00000024313.2	.	24	22	2
30901108	T	PCTP,RPL37A	intergenic	ENSCAFG00000017369.4,ENSCAFG00000024313.2	.	4	7	-3
30902124	G	PCTP,RPL37A	intergenic	ENSCAFG00000017369.4,ENSCAFG00000024313.2	.	0	1	-1
30902281	GAAAAAAAAAA,GAAAAAAAAA	PCTP,RPL37A	intergenic	ENSCAFG00000017369.4,ENSCAFG00000024313.2	.	1	0	1
30902281	GAAAAAAAAAA,GAAAAAAAAAAA,GAAAAAAAAA	PCTP,RPL37A	intergenic	ENSCAFG00000017369.4,ENSCAFG00000024313.2	.	0	1	-1
30902604	A	PCTP,RPL37A	intergenic	ENSCAFG00000017369.4,ENSCAFG00000024313.2	.	0	3	-3
30902764	TACACACACACACAAACACACACACACACACA	PCTP,RPL37A	intergenic	ENSCAFG00000017369.4,ENSCAFG00000024313.2	.	1	1	0
30902780	A	PCTP,RPL37A	intergenic	ENSCAFG00000017369.4,ENSCAFG00000024313.2	.	1	0	1
30902780	AACACACACACACACA	PCTP,RPL37A	intergenic	ENSCAFG00000017369.4,ENSCAFG00000024313.2	.	1	0	1
30902937	T	PCTP,RPL37A	intergenic	ENSCAFG00000017369.4,ENSCAFG00000024313.2	.	0	14	-14
30903447	CAG	PCTP,RPL37A	intergenic	ENSCAFG00000017369.4,ENSCAFG00000024313.2	.	24	24	0
30903696	A	PCTP,RPL37A	intergenic	ENSCAFG00000017369.4,ENSCAFG00000024313.2	.	0	12	-12
30903762	G	PCTP,RPL37A	intergenic	ENSCAFG00000017369.4,ENSCAFG00000024313.2	.	24	21	3
30903767	G	PCTP,RPL37A	intergenic	ENSCAFG00000017369.4,ENSCAFG00000024313.2	.	24	24	0
30903955	C	PCTP,RPL37A	intergenic	ENSCAFG00000017369.4,ENSCAFG00000024313.2	.	24	21	3
30903996	AAATA	PCTP,RPL37A	intergenic	ENSCAFG00000017369.4,ENSCAFG00000024313.2	.	24	21	3
30904103	T	PCTP,RPL37A	intergenic	ENSCAFG00000017369.4,ENSCAFG00000024313.2	.	24	21	3
30904105	G	PCTP,RPL37A	intergenic	ENSCAFG00000017369.4,ENSCAFG00000024313.2	.	24	21	3
30904172	A	PCTP,RPL37A	intergenic	ENSCAFG00000017369.4,ENSCAFG00000024313.2	.	24	21	3
30904215	G	PCTP,RPL37A	intergenic	ENSCAFG00000017369.4,ENSCAFG00000024313.2	.	0	14	-14
30904351	T	PCTP,RPL37A	intergenic	ENSCAFG00000017369.4,ENSCAFG00000024313.2	.	24	21	3
30904436	T	PCTP,RPL37A	intergenic	ENSCAFG00000017369.4,ENSCAFG00000024313.2	.	0	14	-14
30904614	T	PCTP,RPL37A	intergenic	ENSCAFG00000017369.4,ENSCAFG00000024313.2	.	23	24	-1
30904614	T,G	PCTP,RPL37A	intergenic	ENSCAFG00000017369.4,ENSCAFG00000024313.2	.	1	0	1
30904795	G	PCTP,RPL37A	intergenic	ENSCAFG00000017369.4,ENSCAFG00000024313.2	.	24	20	4
30904799	T	PCTP,RPL37A	intergenic	ENSCAFG00000017369.4,ENSCAFG00000024313.2	.	24	24	0
30904844	C	PCTP,RPL37A	intergenic	ENSCAFG00000017369.4,ENSCAFG00000024313.2	.	0	14	-14
30904869	C	PCTP,RPL37A	intergenic	ENSCAFG00000017369.4,ENSCAFG00000024313.2	.	0	14	-14
30904929	A	PCTP,RPL37A	intergenic	ENSCAFG00000017369.4,ENSCAFG00000024313.2	.	0	14	-14
30905556	T	PCTP,RPL37A	intergenic	ENSCAFG00000017369.4,ENSCAFG00000024313.2	.	0	14	-14
30905725	C	PCTP,RPL37A	intergenic	ENSCAFG00000017369.4,ENSCAFG00000024313.2	.	0	14	-14
30905789	G	PCTP,RPL37A	intergenic	ENSCAFG00000017369.4,ENSCAFG00000024313.2	.	0	14	-14
30905915	C	PCTP,RPL37A	intergenic	ENSCAFG00000017369.4,ENSCAFG00000024313.2	.	0	14	-14
30906157	G	PCTP,RPL37A	intergenic	ENSCAFG00000017369.4,ENSCAFG00000024313.2	.	0	13	-13
30906282	CTTTTTTTTTTTTTT,CTTTTTTTTTTTTTTT,CTTTTTTTTTTTTT	PCTP,RPL37A	intergenic	ENSCAFG00000017369.4,ENSCAFG00000024313.2	.	1	1	0
30906282	CTTTTTTTTTTTTTT,CTTTTTTTTTTTTTTT,CTTTTTTTTTTTTTTTT	PCTP,RPL37A	intergenic	ENSCAFG00000017369.4,ENSCAFG00000024313.2	.	1	0	1
30906326	CAGAGAGAGAGAGAG	PCTP,RPL37A	intergenic	ENSCAFG00000017369.4,ENSCAFG00000024313.2	.	0	3	-3
30906326	CAGAGAGAGAGAGAG,CAGAGAGAGAGAG	PCTP,RPL37A	intergenic	ENSCAFG00000017369.4,ENSCAFG00000024313.2	.	0	4	-4
30906326	CAGAGAGAGAGAGAG,CAGAGAGAGAGAGAGAGAG	PCTP,RPL37A	intergenic	ENSCAFG00000017369.4,ENSCAFG00000024313.2	.	0	1	-1
30906907	T	PCTP,RPL37A	intergenic	ENSCAFG00000017369.4,ENSCAFG00000024313.2	.	0	14	-14
30907909	A	PCTP,RPL37A	intergenic	ENSCAFG00000017369.4,ENSCAFG00000024313.2	.	0	2	-2
30907910	C	PCTP,RPL37A	intergenic	ENSCAFG00000017369.4,ENSCAFG00000024313.2	.	0	4	-4
30907910	CCA	PCTP,RPL37A	intergenic	ENSCAFG00000017369.4,ENSCAFG00000024313.2	.	1	1	0
30907910	CCACA	PCTP,RPL37A	intergenic	ENSCAFG00000017369.4,ENSCAFG00000024313.2	.	3	2	1
30907910	CCACACACACACACACACACACACACACAC	PCTP,RPL37A	intergenic	ENSCAFG00000017369.4,ENSCAFG00000024313.2	.	0	1	-1
30907910	CCACACACACACACACACACACACACACAC,CCACACACACACACACACACACACAC,CCACACACACACACACACACACAC	PCTP,RPL37A	intergenic	ENSCAFG00000017369.4,ENSCAFG00000024313.2	.	0	1	-1
30907910	CCACACACACACACACACACACACACACAC,CCACACACACACACACACACACACACAC	PCTP,RPL37A	intergenic	ENSCAFG00000017369.4,ENSCAFG00000024313.2	.	0	2	-2
30907910	CCACACACACACACACACACACACACACAC,CCACACACACACACACACACACACACAC,CCACACACACACACACACACACACACACACACACACACACAC	PCTP,RPL37A	intergenic	ENSCAFG00000017369.4,ENSCAFG00000024313.2	.	0	1	-1
30907910	CCACACACACACACACACACACACACACAC,CCACACACACACACACACACACACACACACACACACACACAC	PCTP,RPL37A	intergenic	ENSCAFG00000017369.4,ENSCAFG00000024313.2	.	0	1	-1
30907910	CCACACACACACACACACACACACACACAC,CCACACACACACACACACACACACACACACACACACACACAC,CCACACACACACACACACACACAC	PCTP,RPL37A	intergenic	ENSCAFG00000017369.4,ENSCAFG00000024313.2	.	0	1	-1
30907910	CCACACACACACACACACACACACACACAC,CCACACACACACACACACACACACACACACACACACACACAC,CCACACACACACACACACACACACACACACAC	PCTP,RPL37A	intergenic	ENSCAFG00000017369.4,ENSCAFG00000024313.2	.	0	1	-1
30907910	CCACACACACACACACACACACACACACACACACACACAC,CCACACACACACACACACACACACACACACACACACACACAC	PCTP,RPL37A	intergenic	ENSCAFG00000017369.4,ENSCAFG00000024313.2	.	1	0	1
30907910	CCACACACACACACACACACACACACACACACACACACACAC	PCTP,RPL37A	intergenic	ENSCAFG00000017369.4,ENSCAFG00000024313.2	.	2	0	2
30907910	CCACACACACACACACACACACACACACACACACACACACAC,CCACACACACACACACACACACACACACAC,CCACACACACACACACACACACACACACACACACACACAC	PCTP,RPL37A	intergenic	ENSCAFG00000017369.4,ENSCAFG00000024313.2	.	1	0	1
30907910	CCACACACACACACACACACACACACACACACACACACACAC,CCACACACACACACACACACACACACACACACACACACAC	PCTP,RPL37A	intergenic	ENSCAFG00000017369.4,ENSCAFG00000024313.2	.	6	2	4
30907910	CCACACACACACACACACACACACACACACACACACACACAC,CCACACACACACACACACACACACACACACACACACACACACAC	PCTP,RPL37A	intergenic	ENSCAFG00000017369.4,ENSCAFG00000024313.2	.	0	1	-1
30907910	CCACACACACACACACACACACACACACACACACACACACAC,CCACACACACACACACACACACACACACACACACACACACACAC,CCACACACACACACACACACACACACACACACACACACAC	PCTP,RPL37A	intergenic	ENSCAFG00000017369.4,ENSCAFG00000024313.2	.	1	1	0
30907910	CCACACACACACACACACACACACACACACACACACACACAC,CCACACACACACACACACACACACACACACACACACACACACACAC	PCTP,RPL37A	intergenic	ENSCAFG00000017369.4,ENSCAFG00000024313.2	.	0	1	-1
30907910	CCACACACACACACACACACACACACACACACACACACACACAC,CCACACACACACACACACACACACACACACACACACACACAC,CCACACACACACACACACACACACACACACACACACACAC	PCTP,RPL37A	intergenic	ENSCAFG00000017369.4,ENSCAFG00000024313.2	.	0	1	-1
30907912	ACACCCAC	PCTP,RPL37A	intergenic	ENSCAFG00000017369.4,ENSCAFG00000024313.2	.	0	1	-1
30907917	CACAAACA	PCTP,RPL37A	intergenic	ENSCAFG00000017369.4,ENSCAFG00000024313.2	.	1	0	1
30907918	ACACACCCACAC	PCTP,RPL37A	intergenic	ENSCAFG00000017369.4,ENSCAFG00000024313.2	.	1	0	1
30907920	ACACCCAC	PCTP,RPL37A	intergenic	ENSCAFG00000017369.4,ENSCAFG00000024313.2	.	2	0	2
30907921	C	PCTP,RPL37A	intergenic	ENSCAFG00000017369.4,ENSCAFG00000024313.2	.	0	1	-1
30907925	C	PCTP,RPL37A	intergenic	ENSCAFG00000017369.4,ENSCAFG00000024313.2	.	0	1	-1
30907928	ACACCCAC	PCTP,RPL37A	intergenic	ENSCAFG00000017369.4,ENSCAFG00000024313.2	.	1	0	1
30907929	CACATACA	PCTP,RPL37A	intergenic	ENSCAFG00000017369.4,ENSCAFG00000024313.2	.	0	1	-1
30907934	ACACCCAC	PCTP,RPL37A	intergenic	ENSCAFG00000017369.4,ENSCAFG00000024313.2	.	1	0	1
30907935	CACACAAACACA	PCTP,RPL37A	intergenic	ENSCAFG00000017369.4,ENSCAFG00000024313.2	.	1	0	1
30907936	A	PCTP,RPL37A	intergenic	ENSCAFG00000017369.4,ENSCAFG00000024313.2	.	0	1	-1
30907937	CACAAACA	PCTP,RPL37A	intergenic	ENSCAFG00000017369.4,ENSCAFG00000024313.2	.	1	1	0
30907938	ACACCCAC	PCTP,RPL37A	intergenic	ENSCAFG00000017369.4,ENSCAFG00000024313.2	.	1	0	1
30907942	ACACCCAC	PCTP,RPL37A	intergenic	ENSCAFG00000017369.4,ENSCAFG00000024313.2	.	0	1	-1
30907943	CACAAACA	PCTP,RPL37A	intergenic	ENSCAFG00000017369.4,ENSCAFG00000024313.2	.	1	0	1
30907945	CACAAAC	PCTP,RPL37A	intergenic	ENSCAFG00000017369.4,ENSCAFG00000024313.2	.	1	0	1
30907946	ACACCC	PCTP,RPL37A	intergenic	ENSCAFG00000017369.4,ENSCAFG00000024313.2	.	1	1	0
30908097	T	PCTP,RPL37A	intergenic	ENSCAFG00000017369.4,ENSCAFG00000024313.2	.	0	11	-11
30908356	C	PCTP,RPL37A	intergenic	ENSCAFG00000017369.4,ENSCAFG00000024313.2	.	0	2	-2
30908436	C	PCTP,RPL37A	intergenic	ENSCAFG00000017369.4,ENSCAFG00000024313.2	.	0	1	-1
30908734	TA	PCTP,RPL37A	intergenic	ENSCAFG00000017369.4,ENSCAFG00000024313.2	.	0	10	-10
30908734	TAAAAAAAA	PCTP,RPL37A	intergenic	ENSCAFG00000017369.4,ENSCAFG00000024313.2	.	0	3	-3
30908896	C	PCTP,RPL37A	intergenic	ENSCAFG00000017369.4,ENSCAFG00000024313.2	.	0	14	-14
30909060	A	PCTP,RPL37A	intergenic	ENSCAFG00000017369.4,ENSCAFG00000024313.2	.	0	14	-14
30909121	G	PCTP,RPL37A	intergenic	ENSCAFG00000017369.4,ENSCAFG00000024313.2	.	0	14	-14
30909134	A	PCTP,RPL37A	intergenic	ENSCAFG00000017369.4,ENSCAFG00000024313.2	.	0	14	-14
30909655	C	PCTP,RPL37A	intergenic	ENSCAFG00000017369.4,ENSCAFG00000024313.2	.	0	14	-14
[truncated: 28,198 more rows]
