# Supplementary material for: Novel protective and risk loci in hip dysplasia in German Shepherds
Source: PLOS journal article supplement (doi:10.1371/journal.pgen.1008197), 2019-07-19
Supplement: S19 (10.1371/journal.pgen.1008197.s019) [file journal.pgen.1008197.s019]

| Name        | Sequence                                                                                                                                                                                                                                                                                                                                                                                                                                                                                                                                                                                                                            |
|-------------|-------------------------------------------------------------------------------------------------------------------------------------------------------------------------------------------------------------------------------------------------------------------------------------------------------------------------------------------------------------------------------------------------------------------------------------------------------------------------------------------------------------------------------------------------------------------------------------------------------------------------------------|
| Construct A | CTCAGGAAGTTCGTTTACACCGAGGGCCTGGAAAGCTTGGAGAGC<br>ACAGACCCGAGCAGTCCAGGCCCCCGCAGCGCGCGCACGCACAC<br>ACTATGACACGGACACGCGAGCAGAAGCGGAGCTGGGCCGGGCG<br>GACCGCAGGCGAACCCACCTCGCGGGGCGCCCCCGCCAGCGCCA<br>GGTGCAGGACTCGCCGGGCGCCAGCAGAGGGCGCGCCGCCCCAG<br>GGAGCCGAGCAGCGGCGGCGCGGAACCCGGCCGGCTAGGGGAGC<br>CGCAGGCGAGCCGGACGCGCCCCTGCAGCTCGGCCACTCAGGGTG<br>CAGGACCCGGCCAAGGAGGAGGAGGAGGAGGAGGAGGAGGAGG<br>AGGAGGAGGAGGGCGAGGAGCGGACCCCCCTCGTGGGCCCGAGT<br>AACAGACGGGCAGGAGTGCTTCTAGGAATTACATCACGCTGCGCA<br>ACGCTGCGGCTCTCGGAGTCCTGCTCAAAGTGTGTGTGTGTGT<br>GTGTGTGTGTGTGTGTGTGTGTGTGTGTGTGTGTGTGTGTGTGT<br>GACTCAGAGCCAGCTCCGGAGAGAGGAAGGCCGA |
| Construct B | CTCAGGAAGTTCGTTTACACCGAGGGCCTGGAAAGCTTGGAGAGC<br>ACAGACCCGAGCAGTCCAGGCCCCCGCAGCGCGCGCACGCACAC<br>ACTATGACACGGACACGCGAGCAGAAGCGGAGCTGGGCCGGGCG<br>GACCGCAGGCGAACCCACCTCGCGGGGCGCCCCCGCCAGCGCCA<br>GGTGCAGGACTCGCCGGGCGCCAGCAGAGGGCGCGCCGCCCCAG<br>GGAGCCGAGCAGCGGCGGCGCGGAACCCGGCCGGCTAGGGGAGC<br>CGCAGGCGAGCCGGACGCGCCCCTGCAGCTCGGCCACTCAGGGTG<br>CAGGACCCGGCCAAGGAGGAGGAGGAGGAGGGCGAGGAGCGGA<br>CCCCCCTCGTGGGCCCGAGTAACAGACGGGCAGGAGTGCTTCTA<br>GGAATTACATCACGCTGCGCAACGCTGCGGCTCTCGGAGTCCTGCT<br>CAAAGTGTGTGTGTGTGTGTGTGTGTGTGTGTGTGTGTGTGTGT<br>TGTACGCGCTGGGGGGAGGGGACTCAGAGCCAGCTCCGGAGAGA<br>GGAAGGCCGA                       |
| Construct C | CTCAGGAAGTTCGTTTACACCGAGGGCCTGGAAAGCTTGGAGAGC<br>ACAGACCCGAGCAGTCCAGGCCCCCGCAGCGCGCGCACGCACAC<br>ACTATGACACGGACACGCGAGCAGAAGCGGAGCTGGGCCGGGCG<br>GACCGCAGGCGAACCCACCTCGCGGGGCGCCCCCGCCAGCGCCA<br>GGTGCAGGACTCGCCGGGCGCCAGCAGAGGGCGCGCCGCCCCAG<br>GGAGCCGAGCAGCGGCGGCGCGGAACCCGGCCGGCTAGGGGAGC<br>CGCAGGCGAGCCGGACGCGCCCCTGCAGCTCGGCCACTCAGGGTG<br>CAGGACCCGGCCAAGGAGGAGGAGGAGGAGGAGGAGGGCGAGGAGC<br>GGACCCCCCTCGTGGGCCCGAGTAACAGACGGGCAGGAGTGCTTC<br>CTAGGAATTACATCACGCTGCGCAACGCTGCGGCTCTCGGAGTCCT<br>GCTCAAAGTGTGTGTGTGTGTGTGTGTGTGTGTGTGTGTGTGTGT<br>GTGTGTACGCGCTGGGGGGAGGGGACTCAGAGCCAGCTCCGGAG<br>AGAGGAAGGCCGA               |

Construct sequences A to C for Dual luciferase reporter assay design.
