# Supplementary material for: Novel protective and risk loci in hip dysplasia in German Shepherds
Source: PLOS journal article supplement (doi:10.1371/journal.pgen.1008197), 2019-07-19
Supplement: S21 (10.1371/journal.pgen.1008197.s021) [file journal.pgen.1008197.s021]

TOP hits for transcription factor with predicted binding sites in the dog genomic sequence in S9 Fig.

| <b>adjusted P (minimum)</b> | <b>ID</b> | <b>name</b>   | <b>family</b>                                |
|-----------------------------|-----------|---------------|----------------------------------------------|
| 0.00211691856384277         | MA0131.2  | HINFP         | Factors with multiple dispersed zinc fingers |
| 0.00358247756958008         | MA0471.1  | E2F6          | E2F-related factors                          |
| 0.00879335403442383         | MA0470.1  | E2F4          | E2F-related factors                          |
| 0.0169353485107422          | MA0814.1  | TFAP2C(var.2) | AP-2                                         |
| 0.0192151069641113          | MA0812.1  | TFAP2B(var.2) | AP-2                                         |
| 0.0276827812194824          | MA0003.3  | TFAP2A        | AP-2                                         |

For each matrix ID the minimum of the Bonferroni corrected (N=1316) p values is presented. For the detailed descriptions of predicted binding sites for each matrix ID, see S8 Table.
